# Supplementary material for: Community-based rehabilitation training after stroke: results of a pilot randomised controlled trial (ReTrain) investigating acceptability and feasibility
Source: PubMed Central journal article supplement (PMC5829775; doi:10.1136/bmjopen-2017-018409), 2018-02-15
Supplement: bmjopen-2017-018409.draft_revisions.pdf [file bmjopen-2017-018409.draft_revisions.pdf]

# BMJ Open

BMJ Open is committed to open peer review. As part of this commitment we make the peer review history of every article we publish publicly available.

When an article is published we post the peer reviewers' comments and the authors' responses online. We also post the versions of the paper that were used during peer review. These are the versions that the peer review comments apply to.

The versions of the paper that follow are the versions that were submitted during the peer review process. They are not the versions of record or the final published versions. They should not be cited or distributed as the published version of this manuscript.

BMJ Open is an open access journal and the full, final, typeset and author-corrected version of record of the manuscript is available on our site with no access controls, subscription charges or pay-per-view fees (<http://bmjopen.bmj.com>).

If you have any questions on BMJ Open's open peer review process please email [editorial.bmjopen@bmj.com](mailto:editorial.bmjopen@bmj.com)

# BMJ Open

## Community-based Rehabilitation Training after stroke: Results of a pilot randomised controlled trial (ReTrain)

|                                 |                                                                                                                                                                                                                                                                                                                                                                                                                                                                                                                                                                                                                                                                                                                                                                                                                                 |
|---------------------------------|---------------------------------------------------------------------------------------------------------------------------------------------------------------------------------------------------------------------------------------------------------------------------------------------------------------------------------------------------------------------------------------------------------------------------------------------------------------------------------------------------------------------------------------------------------------------------------------------------------------------------------------------------------------------------------------------------------------------------------------------------------------------------------------------------------------------------------|
| Journal:                        | <i>BMJ Open</i>                                                                                                                                                                                                                                                                                                                                                                                                                                                                                                                                                                                                                                                                                                                                                                                                                 |
| Manuscript ID                   | bmjopen-2017-018409                                                                                                                                                                                                                                                                                                                                                                                                                                                                                                                                                                                                                                                                                                                                                                                                             |
| Article Type:                   | Research                                                                                                                                                                                                                                                                                                                                                                                                                                                                                                                                                                                                                                                                                                                                                                                                                        |
| Date Submitted by the Author:   | 28-Jun-2017                                                                                                                                                                                                                                                                                                                                                                                                                                                                                                                                                                                                                                                                                                                                                                                                                     |
| Complete List of Authors:       | Dean, Sarah; PenCLAHRC University of Exeter Medical School, Poltawski, Leon; University of Exeter Medical School<br>Forster, Anne; University of Leeds, Academic Unit of Elderly Care and Rehabilitation<br>Taylor, Rod; University of Exeter, Peninsula Medical School<br>Spencer, Anne<br>James, Martin; South West NHS Trust<br>Allison, Rhoda; Torbay and Southern Devon Health and Care NHS Trust<br>Stevens, Shirley; University of Exeter Medical School<br>Norris, Meriel; Brunel University London<br>Shepherd, Anthony; University of Portsmouth, Sport and Exercise Science<br>Lando, Paola; University of Exeter Medical School<br>Pulsford, Richard; University of Exeter, Sports and Health Science<br>Hollands, Laura; University of Exeter Medical School<br>Calitri, Raff; University of Exeter Medical School |
| <b>Primary Subject Heading</b>: | Rehabilitation medicine                                                                                                                                                                                                                                                                                                                                                                                                                                                                                                                                                                                                                                                                                                                                                                                                         |
| Secondary Subject Heading:      | Cardiovascular medicine, Health services research                                                                                                                                                                                                                                                                                                                                                                                                                                                                                                                                                                                                                                                                                                                                                                               |
| Keywords:                       | STROKE MEDICINE, REHABILITATION MEDICINE, Clinical trials < THERAPEUTICS                                                                                                                                                                                                                                                                                                                                                                                                                                                                                                                                                                                                                                                                                                                                                        |
|                                 |                                                                                                                                                                                                                                                                                                                                                                                                                                                                                                                                                                                                                                                                                                                                                                                                                                 |

SCHOLARONE™  
Manuscripts

**Title** Community-based Rehabilitation Training after stroke: Results of a pilot randomised controlled trial (ReTrain)

Sarah G Dean<sup>1</sup>, Leon Poltawski<sup>1</sup>, Anne Forster<sup>2</sup>, Rod S Taylor<sup>1</sup>, Anne Spencer<sup>1</sup>, Martin James<sup>1,3</sup>, Rhoda Allison<sup>4</sup>, Shirley Stevens<sup>1</sup>, Meriel Norris<sup>5</sup>, Anthony I Shepherd<sup>6</sup>, Paolo Landa<sup>1</sup>, Richard M Pulsford<sup>7</sup>, Laura Hollands<sup>1</sup>, Raff Calitri<sup>1</sup>.

<sup>1</sup>University of Exeter Medical School, Exeter, EX1 2LU, UK.

<sup>2</sup>Academic Unit of Elderly Care and Rehabilitation, University of Leeds, Bradford, BD9 6RJ, UK.

<sup>3</sup>Royal Devon & Exeter Hospital, Exeter, EX2 5DW, UK.

<sup>4</sup>Torbay and South Devon NHS Foundation Trust, Torquay, TQ2 7TD, UK.

<sup>5</sup>Department of Clinical Sciences, Brunel University London, Middlesex UB8 3PH, UK.

<sup>6</sup> Department of Sport and Exercise Science, University of Portsmouth, Portsmouth, PO1 2ER.

<sup>7</sup>Sports & Health Sciences, University of Exeter, Exeter, EX1 2LU, UK.

**Corresponding author**

Associate Professor Sarah Dean,

Psychology Applied to Rehabilitation and Health,

University of Exeter Medical School,

College House

St Luke's Campus,

Exeter,

EX1 2LU,

Email: [s.dean@exeter.ac.uk](mailto:s.dean@exeter.ac.uk)

01392 722984

**Word count 4267**

1  
2  
3  
4  
5  
6  
7  
8 **Key words:** Stroke, Rehabilitation Medicine, Clinical Trials.

9  
10 **Abstract**

11  
12 **Objectives:** To assess acceptability and feasibility of trial processes and the ReTrain  
13 intervention including an assessment of intervention fidelity. **Design:** A two-group, assessor-  
14 blinded, randomised controlled trial with parallel mixed methods process and economic  
15 evaluations. **Setting:** Community settings across two sites in Devon. **Participants:** Eligible  
16 participants were: 18 years old or over with self-reported mobility issues, no  
17 contraindications to physical activity, discharged from NHS or any other formal  
18 rehabilitation programme at least 1 month prior to entry into the trial, willing to be  
19 randomised to either control or ReTrain and to attend the training venue, possessing  
20 cognitive capacity and communication ability sufficient to participate in the study.  
21 Participants were individually randomised (1:1) via a computer generated randomisation  
22 sequence minimised for time since stroke and level of functional disability. Only outcome  
23 assessors independent of the research team were blinded to group allocation.  
24 **Interventions:** ReTrain comprised (1) an introductory one-to-one session; (2) ten, twice  
25 weekly group classes with up to two trainers and eight clients; (3) a closing one-to-one  
26 session, followed by three drop-in sessions over the subsequent three months. Participants  
27 received a bespoke home-based training programme. All participants received treatment as  
28 usual. The control group received an exercise after stroke advice booklet. **Outcome**  
29 **measures:** Candidate primary outcomes included functional mobility and physical activity.  
30 **Results:** Forty-five participants were randomised (ReTrain=23; Control=22); data were  
31 available from 40 participants at six months follow-up (ReTrain=21; Control=19) and 41 at  
32 nine months follow-up (ReTrain=21; Control=20). We demonstrated ability to recruit and  
33 retain participants. Participants were not burdened by the requirements of the study. We  
34 were able to calculate sample estimates for candidate primary outcomes and test  
35 procedures for process and health economic evaluations. **Conclusions:** All objectives were  
36 fulfilled and indicated that a definitive trial of ReTrain is feasible and acceptable.

37  
38  
39  
40  
41  
42  
43  
44  
45  
46 **Registration:** ClinicalTrials.gov: trial number NCT02429180.

47  
48 **Funding:** The Stroke Association TSA 2014-13

**Strengths and limitations of this study**

- A community-based exercise intervention after stroke developed with service users
- A pilot randomised trial developed following MRC guidelines on complex interventions
- Mixed-method approach for answering feasibility and acceptability objectives
- Objective physical activity capture via accelerometry but subjective self-report outcomes for functional mobility and psycho-social measurements

For peer review only

## Introduction

Five years after initial stroke, one in three individuals have residual physical impairment<sup>1</sup>. This equates to over 300,000 individuals in the UK living with disability from stroke<sup>2</sup>. Provision of stroke rehabilitation is typically front loaded, with resources focussed on in-patient care and early supported discharge. Support tapers off after a few months<sup>3</sup> with many individuals reporting unmet long-term needs<sup>4</sup>.

The National Clinical Guideline for Stroke advise for secondary prevention that stroke survivors engage in 150 minutes of physical activity a week, in bouts of 10 minutes or more, starting light and developing across time to moderate levels of intensity<sup>5</sup>. However, many stroke survivors do not meet these recommendations<sup>6 7</sup> due to combinations of personal (e.g., physical or psychological impairments) and environmental factors (e.g., lack of programmes and facilities). To address this problem, community-based programmes are promoted<sup>8-10</sup>. These tend to focus on cardiovascular fitness with less emphasis on functional improvements or on promoting on-going exercise self-management. National stroke guidelines<sup>5</sup> identify the importance of interventions for functional improvement<sup>11</sup> and self-management<sup>12</sup> but evidence is lacking regarding these types of intervention<sup>13</sup>.

Action for Rehabilitation following Neurological Injury (ARNI) is an approach aimed at improving function and facilitating self-management<sup>14</sup> and has a detailed self-help book. The ARNI approach embodies a set of principles (e.g. instilling a commitment to regular exercise) and techniques tailored to individual need. The ARNI Institute trains registered exercise professionals to deliver key ARNI techniques. Clinical Commissioning Groups (CCGs), charitable, and local authorities have started to provide community-based ARNI training for stroke survivors, which has been positively received by participants, carers and practitioners<sup>15</sup>, however there is currently no randomised controlled trial (RCT) evidence for evaluating its impact on stroke outcomes or its cost-effectiveness.

## Background and objectives

Using the Medical Research Council's framework for the development and evaluation of complex interventions<sup>16</sup> and considerable Patient and Public Involvement we have designed a testable programme called Rehabilitation Training (ReTrain)<sup>17-20</sup>. ReTrain is a community-based, manualised group programme combining ARNI principles and key techniques with best practice guidelines for stroke<sup>9 17</sup>. The overall aim of our pilot RCT was to inform the design and delivery of a definitive RCT. Our objectives were to: 1) assess feasibility and acceptability of recruitment, randomisation, allocation concealment and outcome assessment blinding; 2) determine retention rates; 3) check ReTrain's acceptability and feasibility for participants, and refine the Trainer Manual; 4) test candidate outcome measures, assess their burden, levels of completion, and estimate outcome variance (to inform definitive trial sample size); 5) perform process evaluation including intervention

1  
2  
3 fidelity assessment; 6) calculate ReTrain costs and assess feasibility of collecting health and  
4 social service resource use.  
5

## 6 **Methods**

7  
8  
9 A brief methods overview is provided in accordance with guidance for reporting pilot  
10 trials<sup>21</sup>; further details are available in the published protocol<sup>22</sup>.  
11

### 12 **Trial design**

13  
14 ReTrain was a two-group, assessor-blinded, randomised controlled external pilot trial with  
15 parallel mixed methods process and economic evaluations. Eligible participants were  
16 individually randomised 1:1 to intervention (ReTrain) or control (exercise advice booklet<sup>23</sup>).  
17  
18

### 19 **Participants**

20  
21 Inclusion criteria were: i) diagnosis of stroke; ii) at least 1 month since discharge from NHS  
22 physical rehabilitation services; iii) able to walk independently indoors with or without  
23 mobility aids, but with self-reported difficulty with stairs, slopes or uneven surfaces; iv)  
24 willingness to be randomised and to attend the training venue; v) cognitive capacity and  
25 communication ability sufficient to participate.  
26  
27

28  
29 Exclusion criteria were: less than 18 years old, currently (or within one month of) receiving  
30 ARNI training or have contraindications to moderate to vigorous physical activity (adapted  
31 from American College of Sports Medicine guidelines<sup>24</sup>). Participants were recruited from  
32 two CCGs. Participants were identified by: (1) clinicians in NHS primary care, hospital and  
33 community stroke services; (2) contacts in the local Clinical Research Network and Clinical  
34 Research Facility; (3) promotion via local stroke support networks (e.g. Stroke Association);  
35 (4) word of mouth, study flyers and adverts.  
36  
37  
38

### 39 **Intervention**

40  
41 ReTrain aims to: (1) enhance function through task-related practice, teaching compensatory  
42 techniques, and providing targeted strength training (cardiovascular fitness gains also occur  
43 through these activities); (2) develop self-management skills for on-going rehabilitation; (3)  
44 deliver personalised training using negotiated goals and (4) instil a commitment to regular  
45 exercise for health improvement and longer-term maintenance. ReTrain facilitates safe and  
46 efficient practice of walking in varied terrains, kerbs, cambers and in crowds, turning and  
47 moving quickly, climbing steps and stairs without rails, getting to and from the floor without  
48 furniture or other aids, and moving without mobility aids or while carrying loads. Training is  
49 based on a manual and led by personal trainers on the UK Register of Exercise Professionals  
50 (level 3 or above) who are ARNI-trained and accredited and have had additional training in  
51 the delivery of ReTrain. There was a maximum ratio of one trainer to four stroke survivors.  
52 ReTrain was delivered in a community setting (one gym, two church halls, one community  
53 centre) with twice weekly two hour sessions over three months, comprising: an introductory  
54  
55  
56  
57  
58  
59  
60

one-to-one session (home visit); ten, twice-weekly group classes with up to two trainers and eight clients (training venue); a closing one-to-one session (home visit); followed by three (one per month) drop-in sessions. Participants completed bespoke home-based training (homework) throughout.

### Control

All participants received treatment as usual. The control group also received an advice booklet about exercise after stroke<sup>23</sup>.

### Outcomes

**Feasibility, acceptability and process outcomes:** numbers and details of those approached; recruitment and retention figures. **Acceptability of randomisation, outcome measurement burden, and the intervention:** completion of questionnaires and objective assessments; interviews with ten intervention and ten control group members, and the trainers. **Safety:** Adverse events<sup>25</sup> identified via trainer and ReTrain participants (during the programme) and participant reports (all participants during 6 and 9-month assessments). **Intervention fidelity:** attendance registers, accelerometry, exercise 'homework' diaries, trainer completed session checklists and video analysis of (early, middle and late programme) training sessions.

We tested a range of candidate primary and secondary outcome measures. **Primary Outcomes:** Rivermead Mobility Index<sup>26,27</sup>; Timed Up and Go Test<sup>28</sup>; modified Patient-Specific Functional Scale<sup>29</sup>; 7-day objective physical activity levels using wrist-worn accelerometry (GENEActiv, Activinsights, Kimbolton, Cambridge UK) and a physical activity diary. **Secondary Outcomes:** Stroke Self-efficacy Questionnaire<sup>30</sup>; Fatigue Assessment Scale<sup>31, 32</sup>, exercise beliefs and exercise self-efficacy questionnaires<sup>33</sup>, SF12<sup>34</sup>, EQ-5D-5L<sup>35</sup>, Stroke Quality of Life (QoL) questionnaires<sup>36</sup>, Carer Burden Index<sup>37</sup> and Health and Social Service use through a Service Receipt Inventory<sup>38</sup>.

Physical outcome baseline assessments (completed by research team) and follow-up assessments (at 6 and 9-months, completed by blinded assessor) were conducted in the participant's home. Researchers visited participants to fit the accelerometer, drop off questionnaires and diary one week prior to blind assessor visits. Assessors administered primary outcome physical measures and collected accelerometers, questionnaires and diaries.

### Sample size

We required 48 participants (24 per group) as (a) 30 complete data sets are recommended for pilot studies to estimate outcome variance<sup>39</sup> and (b) we wanted to investigate variations in context by running the intervention three times (*i.e.* 3 x 8 patients). This number also



1  
2  
3 allowed estimation of a predicted attrition rate of 20% with a precision of  $\pm 5\%$  with 95%  
4 certainty.  
5

### 6 7 **Randomisation and blinding**

8  
9 The random sequence was computer generated with minimisation for time since stroke ( $\leq 3$   
10 months versus  $> 3$  months) and level of functional disability (modified Rankin Scale (mRS)<sup>40</sup>  
11 score  $\leq 2$  versus  $> 2$ ). Allocation concealment was ensured by using a password protected  
12 validated web-based remote randomisation service. The Trial Manager requested  
13 randomisation only after a cohort of participants had been consented.  
14

15  
16 Participants, trainers providing the intervention, and researchers conducting the process  
17 and economic evaluations could not be blinded to allocation. However, outcomes were  
18 assessed by independent researchers (not based at research centre) who were blinded to  
19 group allocation. Participants were reminded not to reveal their allocation to assessors but  
20 any un-blinding was recorded; after assessments assessors were asked to guess participant  
21 allocation.  
22  
23

### 24 25 **Data Analysis**

26  
27 Analysis was primarily descriptive with participant flow summarised and estimates of  
28 screening, recruitment and attrition reported. Means and standard deviations for all  
29 outcomes are reported at baseline, 6 and 9-months follow-up for each group.  
30

31  
32 Intervention fidelity was assessed using mixed methods: qualitative video analysis  
33 comparing the Trainer Manual standard versus observed technique (two researchers  
34 independently assessed videos) combined with interview data and summary scores from  
35 trainer completed session checklists. Qualitative data were analysed descriptively and with  
36 content analysis; additional thematic analysis was used for interview data.  
37  
38

39  
40 We used a micro-costing approach to calculate costs associated with ReTrain: staff time  
41 (trainers, administrator, facilitators), venue hire, training equipment (annualised over time),  
42 course materials, consumables, travel costs (participants, trainers and facilitators). We  
43 analysed the relative benefits of calculating health related QoL using SF-6D (developed from  
44 the SF-12) over the QALY calculated (using EQ-5D 5L) from the baseline measures.  
45  
46

47  
48 Sample size estimates for a definitive trial were calculated for candidate primary outcomes  
49 using the standard deviation observed in this pilot population and published minimal clinical  
50 important difference (MCID) at 90% power and 5% alpha, and assuming 20% attrition.  
51 Where no published MCID could be sourced, we assumed a small to moderate effect size of  
52 0.4 of a standard deviation<sup>41</sup>. The trial statistician undertook calculations using the 'samspi'  
53 command in STATA v14.2  
54  
55

### 56 57 **Results**

Recruitment took place from June 2015 to January 2016. The intervention ran in four cohorts, participant flows are shown for each (Figure 1a) and for the trial overall (Figure 1b). Initial recruitment was slow so to prevent late running of the trial we split the first cohort. Six-month follow-up outcome assessments took place January to July 2016 and 9-month follow-up April to October 2016.

**Objective 1:** *Assess the feasibility and acceptability of recruitment, randomisation, allocation concealment and processes for outcome assessment and blinding*

We screened 115 individuals to recruit 50 participants (Figure 1a) in 8 months (2 months ahead of schedule). Of these, 45 (90%) were randomised (Figure 1a and 1b). Five individuals withdrew prior to randomisation due to ill health or the time lag between agreeing to take part and a cohort being ready to randomise. Table 1 shows baseline characteristics of those randomised, indicating a balance of characteristics across trial arms.

Blinding of outcome assessors was considered successful as only 2/41 (5%) participants revealed their allocations after completion of outcome measures, both were intervention participants. Different assessors were used for subsequent assessments therefore risk of bias was minimised.

**Table 1** Baseline participant demographics

|                                                                      | <b>ReTrain<br/>(N= 23)</b> | <b>Control<br/>(N=22)</b> |
|----------------------------------------------------------------------|----------------------------|---------------------------|
| <b>Gender, n</b>                                                     |                            |                           |
| Male (%)                                                             | 16 (70%)                   | 14 (67)                   |
| <b>Age (years): mean</b>                                             | 70                         | 71                        |
| <b>Age Category (N=45): n (%)</b>                                    |                            |                           |
| <45                                                                  | 1 (4%)                     | 0 (%)                     |
| 46-50                                                                | 0 (0%)                     | 1 (5%)                    |
| 51-60                                                                | 3 (13%)                    | 2 (9%)                    |
| 61-70                                                                | 10 (43%)                   | 6 (27%)                   |
| 71-80                                                                | 5 (22 %)                   | 8 (36%)                   |
| 81-90                                                                | 2 (9%)                     | 5 (23%)                   |
| 90+                                                                  | 2 (9%)                     | 0 (0%)                    |
| <b>Time Since Stroke (no. months):</b>                               |                            |                           |
| < 12                                                                 | 3 (13%)                    | 3 (14%)                   |
| 12-24                                                                | 4 (17%)                    | 4 (18%)                   |
| 25-48                                                                | 5 (22%)                    | 5 (23%)                   |
| 49-72                                                                | 2 (9%)                     | 5 (23%)                   |
| 73-96                                                                | 4 (17%)                    | 2 (9%)                    |
| 97+                                                                  | 5 (22%)                    | 3 (14%)                   |
| <b>Time Since Stroke Minimisation<br/>Categories (months):n, (%)</b> |                            |                           |
| <=3 months                                                           | 1 (4%)                     | 0 (0%)                    |
| >3 months                                                            | 22 (96%)                   | 22 (100%)                 |

|                                                                                            |          |          |
|--------------------------------------------------------------------------------------------|----------|----------|
| <b>Type of Stroke, n (%)</b>                                                               |          |          |
| Haemorrhagic                                                                               | 3 (13%)  | 1 (5%)   |
| Ischaemic                                                                                  | 15 (65%) | 15 (68%) |
| Both                                                                                       | 0 (0%)   | 1 (5%)   |
| Missing                                                                                    | 5 (22%)  | 5 (23%)  |
| <b>Stroke Rehabilitation (weeks):</b>                                                      |          |          |
| n,                                                                                         | 21,      | 21,      |
| Average no. weeks                                                                          | 7        | 14       |
| Median no. weeks                                                                           | 6        | 12       |
| Range                                                                                      | 0-32     | 0-88     |
| Unknown length rehab: n                                                                    | 2        | 1        |
| <b>Functional Disability<br/>(Simplified Modified Rankin Scale<br/>score- sMRS): n (%)</b> |          |          |
| 0                                                                                          | 1 (4%)   | 0 (0%)   |
| 1                                                                                          | 2 (9%)   | 1 (5%)   |
| 2                                                                                          | 4 (17%)  | 9 (41%)  |
| 3                                                                                          | 16 (70%) | 12 (55%) |
| <b>sMRS minimisation categories:<br/>n(%)</b>                                              |          |          |
| <=2                                                                                        | 7 (30%)  | 10 (45%) |
| >2                                                                                         | 16 (70%) | 12 (55%) |
| <b>Co-morbidities<sup>^</sup>, n (%)</b>                                                   |          |          |
| Hypertension                                                                               | 18 (78%) | 18 (82%) |
| Type 2 Diabetes Mellitus                                                                   | 4 (17%)  | 4 (18%)  |
| Depression                                                                                 | 8 (35%)  | 5 (23%)  |
| Chronic Kidney Disease                                                                     | 2 (9%)   | 1 (4%)   |
| Asthma / COPD                                                                              | 4 (17%)  | 3 (14%)  |
| Other                                                                                      | 5 (22%)  | 3 (14%)  |
| <b>Medications<sup>^</sup>, n (%)</b>                                                      |          |          |
| Diuretics                                                                                  | 3 (13%)  | 1 (5%)   |
| Anticoagulants                                                                             | 8 (35%)  | 10 (45%) |
| Antiplatelet                                                                               | 15 (65%) | 12 (55%) |
| Antihypertensives                                                                          |          |          |
| Calcium Channel Blockers                                                                   | 6 (26%)  | 14 (64%) |
| ACE inhibitors                                                                             | 13 (57%) | 8 (36%)  |
| Other                                                                                      | 9 (39%)  | 7 (32%)  |
| Statins                                                                                    | 18 (78%) | 19 (86%) |
| Anti-depressants                                                                           | 8 (35%)  | 5 (23%)  |
| Diabetes medication                                                                        | 4 (17%)  | 4 (18%)  |
| Chronic pain medication                                                                    | 12 (52%) | 8 (36%)  |
| Other                                                                                      | 5 (22%)  | 3 (14%)  |
| <b>Employment Status, n (%)</b>                                                            |          |          |
| Employed (and working)                                                                     | 2 (9%)   | 1 (5%)   |
| Retired                                                                                    | 18 (78%) | 15 (68%) |
| Semi-retired                                                                               | 1 (4%)   | 0 (0%)   |
| Unemployed                                                                                 | 2 (9%)   | 5 (27%)  |
| <b>Pre-stroke Exercise History, n</b>                                                      |          |          |
| Exerciser (%)                                                                              | 10 (43%) | 8 (36%)  |
| <b>Mini Mental State Exam:</b>                                                             |          |          |

|           |             |             |
|-----------|-------------|-------------|
| n,        | 22*,        | 22,         |
| Mean (SD) | 27.5 (2.54) | 27.9 (3.01) |
| Median    | 28          | 29          |
| Range     | 19– 30**    | 19-30**     |

^ Participants may have more than one co-morbidity / medication.

\*1 participant with severe aphasia had difficulties completing the MMSE. The participant could understand and follow instructions and was considered cognitively able to participate in the trial.

\*\*Higher scores indicate better cognitive function. Participants range from no to moderate degree of cognitive impairment.

### **Objective 2: Acquire retention rates and outcome variance**

Forty out of 45 (88%, 95% CI: 76% to 96%) completed 6-month and 9-month follow-ups. Despite fewer people being randomised than expected, high retention preserved the number of datasets needed to perform our sample size estimates (Table 2).

**Table 2 Sample estimates for potential candidate primary outcomes from ReTrain pilot RCT**

| Primary Outcome Measure                    | Sample Size Required |
|--------------------------------------------|----------------------|
| Rivermead Mobility Index                   | 36 – 44*             |
| Timed Up and Go                            | 108 – 1962*          |
| Modified Patient Specific Functional Scale | 16 – 200*            |
| Physical Activity (Accelerometer)          | 430*                 |

\*Sample size for 1:1 allocation at 90% power and 5% alpha and assuming 20% attrition given range of observed SDs observed in this trial and MCIDs

### **Objective 3: Acceptability and feasibility for participants and complete the Trainer manual**

Eleven themes from 20 qualitative interviews summarise participants' views, Table 3 provides illustrative quotes.

#### *a) Study Information*

Participants considered information received as adequate. Five noted that information was limited, but most were unconcerned. Two added that too much information may have been detrimental to recruitment. Four others were satisfied with the information they received.

#### *b) Outcome Measure Burden*

Participants found the assessment process acceptable. Fifteen indicated no burden. Three participants indicated that the questionnaires placed burden on their carer.

Table 3 Participant quotes from qualitative interviews

**Acceptability**

"It is ten weeks, you do it twice a week. Personally for the first say three or four weeks, I'd think well this is getting me nowhere, but then you think that you notice things, things are improving and at the end of ten weeks you want to go for twenty weeks (4:119-125)

"I'd tell them [another stroke survivor] to go ahead and do it and to take it step by step and not to worry about it. Because you are treated with great respect, it was wonderful and they were. I'll never be able to speak highly enough of them." (25:388-390)

**Intervention approach**

"It opened my eyes to what can be done you know. How can I put it? It wasn't as if I believed that I couldn't do something it was being pointed in the right direction...heh I can do it...Great you've done it, you did it and you do it again. Yeah it was great" (4:358-361). "It wasn't easy at first, but I used to manage it" (5:246)

"It was the way they addressed how you do your exercises. What it is doing to you and all the rest of it. Now to me that was absolutely important, because it made sense of why you are doing all this pumping up and down, and if you can't do that, do this." (22:252-255)

"It was you felt as if you were a human being with them. You know and you were treated with respect...and although you couldn't do things and you felt a bit of an idiot, they never let you feel like that" (25:567-572).

"It's a bit like playing scales...it's not creative but as I gradually realise it, it could potentially be creative...doing something that I had been doing without thinking before and now couldn't. ...Now and again I walk without my stick without realising it, that's creative I think." (6:354-392)

**Impact of programme - psychologically**

"I suppose it is attitude of mind as much as anything. I mean I felt I'd gone through that stage of training and that I was going to get better. It built my spirit up...I felt as if it, well it was worth the three months you know and at the end of the day I hope I'm going to get back to something like normal" (16:358-365)

"It really helped me mentally, you know I thought right I can do this because before I was going into my shell, thinking I can't do this and I can't do that. Oh I am not going out. Then I went on that [ReTrain] and it gave me an element of confidence." (43:562-565).

**Impact of programme – physically**

"you started to notice they are actually starting to fall into place. I don't remember doing that last time. But I am doing it now great get on with it I am doing it faster now" (4:189-190)

"I know if I went down which I did one day in the hall in the early stages of coming back home and I did manage to get up and walk upstairs...but I wouldn't have been able to do that had I not had that [training]" (16:475-477)

**Homework adherence**

"trainers were always on about doings exercises at home...I could never pin him down to how long that should be for though" (6; line 624).

**Programme technique adherence**

"I think that was the big thing you saw the benefits after the second, well the first or second session we had. 'Oh we can do that!'...even if you were chastised, 'come on get down, you have got to get up; you can do it!' you know 'try this'. There was a little trick which was another little thing of getting up from the ground which was, didn't need any strength whatsoever and that was one of the big major things, especially for this other guy...doing it in a simple way of you know just sliding around and getting up using your own motion of getting up...that momentum is fantastic, lots of little things like that and you could see it worked." (22:479-499).

1  
2  
3 *c) Venue*

4 Half of the ReTrain participants were very positive about the training venues. Important  
5 features were: space, provision of fluids (water, tea), easy availability of parking. For some  
6 the travelling distance was a concern; two noted their venue (a gym) was very noisy,  
7 insufficiently heated and the session time was too early. Some noted the small amount of  
8 equipment as an advantage (it aided transfer of exercises to their home) whereas others felt  
9 the equipment was not sufficiently specialist.  
10  
11

12  
13 *d) Adherence to ReTrain (see also Objective 5)*

14 All ten ReTrain interviewees reported training in the five core (ARNI) techniques. Homework  
15 was discussed by all but lacked specificity, only two had clear homework examples that  
16 were effectively incorporated into their training. Although goal setting was a core element,  
17 only four specifically identified how their goals were linked into their overall programme.  
18 Three participants reported not attending drop-in sessions due to lack of information. Of  
19 three who attended two suggested the drop-ins repeated previous sessions.  
20  
21

22  
23 *e) Group dynamics*

24 Group working was positively regarded and seen as integral to programme effectiveness.  
25 There were exceptions, one participant did not find 'performing' in public a positive  
26 experience. Likewise some suggested that groups reduced training intensity relative to one-  
27 to-one training.  
28  
29

30  
31 *f) Co-morbidities*

32 Participants identified several co-morbidities e.g.: knee replacements, cancer, angina,  
33 diabetes, amputation and depression. These had potential to impact on both the training  
34 and research participation but for most any concerns were accommodated by trainers.  
35 However, in one case some uncomfortable discussions occurred before an appropriate  
36 balance of perceived capability and training challenges was reached. Three participants with  
37 visual deficits, dyslexia and dysgraphia mentioned difficulties completing the research  
38 documents.  
39  
40

41  
42 *g) Carer Health*

43 Two ReTrain participants commented on how commitment to the programme impacted on  
44 their partner's health: one stopped attending sessions because the time away resulted in  
45 excessive strain on his wife; another expressed similar concern but did not stop attending.  
46  
47

48  
49 *h) Trainer Manual*

50 We refined the Trainer Manual throughout the study. Issues raised during interviews guided  
51 revisions including greater emphasis and clarification about use of goal setting, drop-ins,  
52 homework diaries, and managing participants with co-morbidities.  
53  
54

55 **Objective 4:** *Assess outcome completion and burden*  
56  
57  
58  
59  
60

1  
2  
3 We collected baseline (n=41), 6-month (n=40) and 9-month (n=41) follow-up data on the  
4 majority of participants (Figure 1b). Accelerometry wear time (24 hours for 7 days) was high,  
5 most having 6 or more valid days ( $\geq 16$ hrs per day, including  $\geq 1$  weekend day). Only two  
6 participants at baseline, one at 6-months and three at 9-months did not achieve 4 valid days  
7 of wear time. There was very little missing data. For three primary outcome measures there  
8 was only one participant with missing data at any given assessment time-point. For  
9 secondary outcomes there was either no missing data or only one to two participants with  
10 missing data at each time-point, apart from the exercise diary (between two and four  
11 participants with missing data at each time-point) and the Service Receipt Inventory  
12 (between three and seven participants with missing data). There were eight participants  
13 without accelerometer data at 9-month assessment owing to hardware (device) and  
14 software (data extraction method) malfunctions.  
15  
16  
17  
18

19 **Objective 5:** *Perform process evaluation with an assessment of intervention fidelity*

20  
21 We implemented a comprehensive video recording schedule (over 200 recordings) to  
22 capture participant and trainer adherence to key ARNI techniques. Both trainers and  
23 participants demonstrated high adherence. Modifications to techniques (to accommodate  
24 participant co-morbidities) were captured and informed Trainer Manual development.  
25  
26

27 We combined metrics from attendance registers and homework records to generate a  
28 'dose'/adherence score, categorising individuals into low (< 50%), medium (50% - 75%) and  
29 high (>75%) adherence categories. Of 23 ReTrain participants two did not receive the  
30 intervention (one returned to work; one withdrew from study), five had low adherence, five  
31 medium adherence, and eleven high adherence. These latter 16 (70%) were considered to  
32 have received sufficient 'dose' of ReTrain.  
33  
34  
35

36 Trainers varied in their completion of session checklists: pre-exercise and end-of-session  
37 components were less consistently reported compared to ARNI techniques but overall there  
38 was good adherence to programme delivery.  
39  
40

41 **Objective 6:** *Calculate the cost of intervention delivery and feasibility of collecting health and  
42 social service resource use.*

43  
44 ReTrain costs were generated for each cohort, accounting for different programme sizes  
45 (four or eight participants) and venues. Costs per participant ranged from £615 to £972. The  
46 total per participant cost for ReTrain (assuming 24 participants) was £777. We conducted  
47 medical notes review on 35/41 participants and compared this 'gold standard' with self-  
48 reported health resource use. Participants reported using fewer resources compared to case  
49 notes review. Data from medical notes informed the cost-utility and effectiveness  
50 frameworks for use in a definitive trial.  
51  
52  
53

54 **Descriptive analysis of participant outcomes**

55  
56 Primary and secondary outcome data are summarised in Table 4a and 4b respectively.  
57  
58  
59  
60

**Table 4a: Means and standard deviations as a function of trial arm and measurement time point for candidate primary outcome measures in the ReTrain pilot trial**

|                                                                            | Data collection time point |                        |                        |                        |                        |                        |
|----------------------------------------------------------------------------|----------------------------|------------------------|------------------------|------------------------|------------------------|------------------------|
|                                                                            | Baseline                   |                        | 6 month <sup>^</sup>   |                        | 9 month <sup>^</sup>   |                        |
| Measures: n, Mean (SD)                                                     | ReTrain<br>(N=23)          | Control<br>(N=22)      | ReTrain<br>(N=21)      | Control<br>(N=20)      | ReTrain<br>(N=21)      | Control<br>(N=20)      |
| Rivermead Mobility Index                                                   | 23,<br>11.41 (3.05)        | 22,<br>11.68 (2.23)    | 21,<br>12.14 (2.73)    | 19,<br>12.47 (1.87)    | 21,<br>12.24 (3.27)    | 20,<br>12.65 (1.81)    |
| Modified Patient Specific Functional Scale                                 | 22,<br>2.95 (1.85)         | 22,<br>2.55 (1.23)     | 21,<br>3.47 (2.12)     | 19,<br>3.56 (1.69)     | 21,<br>3.25 (2.03)     | 20,<br>3.74 (1.86)     |
| Timed Up and Go (secs)                                                     | 23,<br>27.57 (27.57)       | 21,<br>21.24 (11.18)   | 21,<br>20.76 (19.64)   | 19,<br>16.37 (9.69)    | 21,<br>20.76 (19.25)   | 20,<br>15.95 (12.00)   |
| Physical Activity: <b>Diary*</b>                                           | 21,<br>6.67 (19.20)        | 20,<br>10.69 (17.39)   | 21,<br>17.39 (24.28)   | 19,<br>25.60 (34.98)   | 19,<br>13.92 (22.25)   | 20,<br>35.11 (49.70)   |
| Physical Activity ( <b>Accelerometer</b> ):<br><b>Total PA minutes*</b>    | 21,<br>145.10 (118.27)     | 20,<br>165.56 (139.09) | 19,<br>134.88 (129.77) | 18,<br>178.15 (155.07) | 16,<br>152.08 (118.52) | 17,<br>197.42 (144.31) |
| Physical Activity ( <b>Accelerometer</b> ):<br><b>Light PA minutes*</b>    | 21,<br>92.78 (93.15)       | 20,<br>110.18 (115.65) | 19,<br>95.67 (105.50)  | 18,<br>121.80 (122.46) | 16,<br>99.33 (99.54)   | 17,<br>134.54 (126.36) |
| Physical Activity ( <b>Accelerometer</b> ):<br><b>MVPA PA minutes*</b>     | 21,<br>52.32 (68.94)       | 20,<br>55.38 (39.66)   | 19,<br>39.21 (39.33)   | 18,<br>56.35 (51.26)   | 16,<br>52.75 (60.03)   | 17,<br>62.88 (41.73)   |
| Physical Activity ( <b>Accelerometer</b> ):<br><b>Moderate PA minutes*</b> | 21,<br>50.53 (66.77)       | 20,<br>53.38 (37.04)   | 19,<br>37.73 (37.40)   | 18,<br>53.07 (43.99)   | 16,<br>51.11 (58.54)   | 17,<br>60.93 (40.84)   |
| Physical Activity ( <b>Accelerometer</b> ):<br><b>Vigorous PA minutes*</b> | 21,<br>1.79 (3.85)         | 20,<br>2.00 (3.96)     | 19,<br>1.48 (2.39)     | 18,<br>3.28 (8.14)     | 16,<br>1.64 (2.38)     | 17,<br>1.94 (2.33)     |

Note: <sup>^</sup> post randomisation; \*Average minutes of physical activity per day



**Table 4b: Means and standard deviations as a function of trial arm and measurement time point for candidate secondary outcome measures in the ReTrain pilot trial**

| Measures: n, Mean (SD)         | Data collection time point |                      |                      |                     |                      |                      |
|--------------------------------|----------------------------|----------------------|----------------------|---------------------|----------------------|----------------------|
|                                | Baseline                   |                      | 6 month <sup>^</sup> |                     | 9 month <sup>^</sup> |                      |
|                                | ReTrain<br>(N=23)          | Control<br>(N=22)    | ReTrain<br>(N=21)    | Control<br>(N=20)   | ReTrain<br>(N=21)    | Control<br>(N=20)    |
| Fatigue Assessment Scale       | 23,<br>27.17 (7.14)        | 22,<br>25.49 (7.44)  | 21,<br>24.05 (6.26)  | 19,<br>24.05 (8.86) | 20,<br>27.45 (5.95)  | 20,<br>25.83 (9.14)  |
| Stroke Self-efficacy           | 22,<br>72.41 (22.00)       | 22,<br>73.46 (17.87) |                      |                     | 20,<br>73.73 (19.63) | 20,<br>74.40 (16.94) |
| Exercise Beliefs               | 23,<br>3.66 (0.70)         | 22,<br>3.78 (0.52)   |                      |                     | 19,<br>4.03 (0.59)   | 19,<br>3.73 (0.52)   |
| Exercise Self-efficacy         | 23,<br>3.26 (0.92)         | 22,<br>3.32 (0.89)   |                      |                     | 19,<br>3.32 (0.89)   | 18,<br>3.22 (1.06)   |
| Stroke Quality of Life (Total) | 22,<br>3.31 (0.68)         | 22,<br>3.45 (0.69)   |                      |                     | 20,<br>3.38 (0.70)   | 20,<br>3.63 (0.82)   |
| EQ-5D-5L                       | 22,<br>0.51 (0.25)         | 20,<br>0.55 (0.24)   |                      |                     | 19,<br>0.52 (0.24)   | 20,<br>0.62 (0.25)   |
| SF-12: Physical Component      | 21,<br>33.12 (7.22)        | 20,<br>31.83 (6.69)  |                      |                     | 19,<br>33.74 (6.44)  | 19,<br>33.25 (6.91)  |
| SF-12: Mental Component        | 21,<br>50.10 (7.11)        | 20,<br>50.68 (7.98)  |                      |                     | 19,<br>50.47 (6.51)  | 19,<br>48.05 (8.45)  |
| Carer Burden Index             | 8,<br>11.39 (8.03)         | 10,<br>7.40 (7.83)   |                      |                     | 9,<br>9.89 (7.22)    | 6,<br>9.50 (8.92)    |

Note: <sup>^</sup> post randomisation; grey cells indicate measurement not taken at this time point

## Safety

During assessment periods there was one serious but unrelated event in the intervention group (none in the control group) and slightly less overall adverse events in the intervention group (Table 5a). For ReTrain only there were three adverse events at the training venue and a further three during the overall intervention period: four were unrelated, one possibly related, and one probably related; none were definitely related to the intervention (Table 5b).

**Table 5a: Adverse Events (AE) and Serious Adverse Events (SAE) reported during 6 and 9-month outcome assessment periods for both ReTrain and Control group**

|                | Event Type | Total Events | Attribution |                  |                  |           | N People Reporting Event |
|----------------|------------|--------------|-------------|------------------|------------------|-----------|--------------------------|
|                |            |              | Related     | Probably Related | Possible Related | Unrelated |                          |
| ReTrain (N=21) |            |              |             |                  |                  |           |                          |
|                | <b>AE</b>  | 125          | 6           | 5                | 73               | 41        | 19                       |
|                | <b>SAE</b> | 1            | 0           | 0                | 0                | 1         | 1                        |
| Control (N=20) | Event Type | Total Events | Related     | Probably Related | Possible Related | Unrelated | N People Reporting Event |
|                | <b>AE</b>  | 150          | 0           | 0                | 0                | 150       | 19                       |
|                | <b>SAE</b> | 0            | 0           | 0                | 0                | 0         | 0                        |

**Table 5b: Adverse Events (AE) and Serious Adverse Events (SAE) reported during ReTrain programme**

|                | Event Type | Total Events | Attribution |                  |                  |           | N People Reporting Event |
|----------------|------------|--------------|-------------|------------------|------------------|-----------|--------------------------|
|                |            |              | Related     | Probably Related | Possible Related | Unrelated |                          |
| ReTrain (N=21) |            |              |             |                  |                  |           |                          |
|                | <b>AE</b>  | 22           | 7           | 0                | 12               | 3         | 11                       |
|                | <b>SAE</b> | 6            | 0           | 1                | 1                | 4         | 5                        |

## Discussion

The ReTrain pilot trial met all its pre-stated feasibility objectives: the intervention, trial design and research processes were acceptable to participants as well as feasible and safe to deliver; we demonstrated feasibility of recruitment and retention; participants were not unduly burdened by study requirements and there were high completion rates for most outcome measures. We also successfully rehearsed procedures for process and health economic evaluations as well as trial governance processes (trial management and independent trial steering meetings) and maintained our strong Patient and Public Involvement. Participant interviews, outcome measurement results and fidelity assessments highlighted refinements that we have already, or can, put in place for a future definitive RCT of ReTrain. Our trial compares favourably with another feasibility RCT assessing the delivery of the Bridges stroke self-management programme<sup>42</sup> which had relatively low recruitment, questions regarding programme delivery in addition to usual rehabilitation, and recommendations for further assessment of intervention fidelity. Some of their findings were similar to ReTrain: participants were broadly positive about their programme; health professionals found it acceptable to use and researchers noted the lack of outcome measure sensitivity for detecting change<sup>42</sup>.

### Limitations and lessons for planning design of a future trial

We have not identified a clear candidate primary outcome for a definitive RCT from this pilot work. Identifying robust outcome measures in rehabilitation trials is a common problem<sup>43</sup> compounded by variability in stroke related disability and participants' comorbidities. This pilot trial was not designed (statistically powered) to test for differences between treatment arms, so no inferential analyses were performed. Any perceived trend (or absence of a trend) should not be interpreted as an indication of an effect (or its absence) and outcomes should not be selected based upon any assumed trend. Acceptability outcomes coupled with a pragmatic and efficient (cost-effective) trial design better inform choice of outcome. From our sample the Timed Up and Go task would be unsuitable due to potentially large sample size requirements (~2000 participants) and the baseline high levels of mobility meant the Rivermead Mobility Index demonstrated a ceiling effect, so could only be used if we altered inclusion criteria. Physical activity was measured robustly via accelerometry and may be the best candidate. We had some software and hardware malfunctions but important lessons have been learned to mitigate these problems in future. Capture of frequency and intensity of activity would allow comparison with stroke guidelines. Although there is a cost implication, accelerometry provides a more objective measurement of daily activity and may also be an adequate proxy of functional mobility.

Further limitations relate to the lack of validation of our adherence measure and the local demographics: our sample did not have a wide age range or ethnic diversity. Whilst we did demonstrate delivery in different locations in the South West our plans for a larger definitive trial would include a wider demographic from more centres across the UK.

1  
2  
3 For a future trial we plan to implement more readable, higher quality written (and pictorial)  
4 information and questionnaires although the amount of information provided was  
5 appropriate. We will mitigate recruitment loss prior to randomisation by establishing  
6 expression of interest and eligibility to take part but delaying taking consent until we are  
7 confident of sufficient numbers to create a cohort for randomisation; this has resource  
8 implications that will need to be built into future funding. We will run ReTrain in community  
9 centres or halls as these were more acceptable and much cheaper than gyms; we will  
10 provide a more detailed ReTrain induction to ensure trainers understand and communicate  
11 all components of the programme. Revisions to the Trainer Manual have already been  
12 made. For the QALY comparisons recent policy changes mean the conversion from SF-12 to  
13 SF-6D has been phased out, and so less justification for using the SF-12 in a future study.  
14 Instead we will consider using the Stroke Impact Scale (SIS) as this is a valid health-related  
15 QoL measure. This may also be a better candidate self-report primary outcome measure for  
16 a definitive trial as it has shown sensitivity in long-term stroke survivors who have mild to  
17 moderate stroke<sup>44</sup>. The SIS assesses multiple facets of physical and emotional issues and so  
18 would align with perceived physical and psychological benefits participants attribute to  
19 ReTrain. Our sample size estimates for candidate primary outcomes (Table 2) indicate we  
20 will need a moderately sized trial (n=430) for physical activity assessed by accelerometry or  
21 a smaller trial (n=96) if we use the physical component domain of the SIS (based on 80%  
22 power, 5% alpha and assuming 20% attrition<sup>45</sup>). We have established appropriate process  
23 evaluation methods to capture multiple facets of intervention fidelity. Moreover we have  
24 some new insights into how to enhance delivery by trainers and engagement by participants  
25 (e.g. more focus on individually tailored goal setting; goal and homework reviews; better  
26 explanation and promotion of the drop-in sessions).

### 36 **Generalisability**

37  
38 This pilot study was not designed to demonstrate generalisability however our participant  
39 population represent the sub-set of community-dwelling stroke survivors who have some  
40 independent mobility but remain with stroke-related disability that affects their QoL. Our  
41 participants also represent the growing proportion of people who have more than one long-  
42 term condition. ReTrain techniques target the effects of stroke but can accommodate other  
43 conditions which trainers take into account when preparing the participant's individually  
44 tailored programme. Some of the key ReTrain (ARNI based) techniques are designed for  
45 people with unilateral impairment, such as hemiparesis; however one of our participant's  
46 main unilateral impairment was due to diabetes related lower limb amputation, illustrating  
47 how ReTrain can accommodate people with multiple co-morbidities.

### 53 **Conclusion**

54  
55 Our pilot trial has demonstrated that ReTrain is feasible, acceptable, and safe. We met our  
56 recruitment and retention targets and demonstrated our ability to run our intervention in  
57 different locations. Participants were not unduly burdened by study requirements and most  
58  
59  
60

1  
2  
3 outcome measures had high levels of completion. We successfully tested procedures for  
4 process and health economic evaluations. Participant interviews, outcome measurement  
5 results and fidelity assessments highlighted some issues needing refinement prior to a  
6 future definitive RCT of ReTrain. Many of these have already been addressed and we intend  
7 to seek funding for a definitive trial.  
8  
9

### 10 **Other information**

11  
12 **Protocol** Version: 5 Date: 20/04/2016. Published version available here:  
13 <http://bmjopen.bmj.com/content/6/10/e012375.full>  
14  
15

### 16 **Acknowledgements**

17  
18 We thank our funders, the Stroke Association and the Peninsula Patient Involvement Group  
19 with the ReTrain Stroke Service User Group for their help. The National Institute for Health  
20 Research (NIHR) Collaboration for Leadership in Applied Health Research and Care South  
21 West Peninsula at the Royal Devon and Exeter NHS Foundation Trust also supported this  
22 work but views expressed are those of the author(s) and not necessarily those of the NHS,  
23 the NIHR or the Department of Health. We also thank our Trial Steering Committee: Ailie  
24 Turton (University of the West of England) Siobhan Creanor (Plymouth University), Debbie  
25 Neal (Bournemouth University), Justin Smallwood (Patient and Public representative), and  
26 Gail Seymour (University of Exeter - Sponsor).  
27  
28  
29  
30

31 Ethical review by NRES Committee South West – Cornwall & Plymouth (REC ref: 15/SW/04).  
32  
33

### 34 **Author's Contributions**

35  
36  
37 SGD led the team and drafted this article, RC prepared protocol, ethical submission and  
38 amendments, managed the project, contributed to analysis; LP drafted protocol prior to  
39 funding application, conducted interviews, contributed to analysis, AF, MJ, RA, MN, SGD &  
40 LP provided stroke rehabilitation expertise; RST provided statistical and trial methodological  
41 expertise, led analysis; MN provided qualitative expertise and analysed qualitative data; AIS  
42 led accelerometry work, supported by RP who provided accelerometry analysis; SGD & LP  
43 provided process evaluation expertise, SGD led the process evaluation and supervised LH;  
44 LH led video analysis work; AS provided health economic expertise and led economic work  
45 supported by PL; SS provided patient and public involvement expertise. All authors  
46 commented on the manuscript.  
47  
48  
49  
50

51 **Data sharing statement:** Participants did not consent for datasets to be stored or accessed  
52 outside of the research team. Therefore no datasets have been made publicly available.  
53  
54

55 **Competing Interests:** We declare funding from the Stroke Association.  
56  
57  
58  
59  
60

## References

1. Feigin VL, Barker-Collo S, McNaughton H, et al. Long-term neuropsychological and functional outcomes in stroke survivors: current evidence and perspectives for new research. *Int J Stroke* 2008;3(1):33-40.
2. Townsend N, Wickramasinghe K, Bhatnagar P, et al. Coronary heart disease statistics: 2012 edition. London: British Heart Foundation, 2012.
3. Teasell R, Mehta S, Pereira S, et al. Time to rethink long-term rehabilitation management of stroke patients. *Top Stroke Rehabil* 2012;19(6):457-62.
4. McKeivitt C, Fudge N, Redfern J, et al. Self-reported long-term needs after stroke. *Stroke* 2011;42(5):1398-403.
5. Intercollegiate Stroke Working Party. National Clinical Guideline for Stroke, Fifth Edition. 5 ed. London: *Royal College of Physicians* 2016.
6. Rand D, Eng JJ, Tang PF, et al. How active are people with stroke?: use of accelerometers to assess physical activity. *Stroke* 2009;40(1):163-8.
7. Stroke Association. Stroke Statistics. London: Stroke Association, 2013.
8. Best C, van Wijck F, Dennis J, et al. A survey of community exercise programmes for stroke survivors in Scotland. *Health Soc Care Community* 2012;20(4):400-11.
9. NHS Stroke Improvement Programme. Life after stroke: Participating in community exercise and fitness 2012 [Available from: <http://www.improvement.nhs.uk/stroke/CommunityStrokeResource/CSRLifeafterstroke/CSRLifeafterstrokeexercisepoststroke/tabid/226/Default.aspx> accessed July 2012.
10. Harrington R, Taylor G, Hollinghurst S, et al. A community-based exercise and education scheme for stroke survivors: a randomized controlled trial and economic evaluation. *Clin Rehabil* 2010;24(1):3-15.
11. French B, Thomas LH, Leathley MJ, et al. Repetitive task training for improving functional ability after stroke. *Cochrane Database Syst Rev* 2007(4):Cd006073.
12. Lennon S, McKenna S, Jones F. Self-management programmes for people post stroke: a systematic review. *Clin Rehabil* 2013;27(10):867-78.
13. Brazzelli M, Saunders David H, Greig Carolyn A, et al. Physical fitness training for stroke patients. *Cochrane Database Syst Rev* 2011; (11). <http://www.mrw.interscience.wiley.com/cochrane/clsysrev/articles/CD003316/frame.html>.
14. Balchin T. The Successful Stroke Survivor: A new guide to functional recovery from stroke. Lingfield, UK: ARNI Trust 2011.
15. Poltawski L. Survey of Group ARNI classes in England, 2011, unpublished report.
16. Craig P, Dieppe P, Macintyre S, et al. Developing and evaluating complex interventions: the new Medical Research Council guidance. *BMJ* 2008;337:a1655.
17. Poltawski L, Abraham C, Forster A, et al. Synthesising practice guidelines for the development of community-based exercise programmes after stroke. *Implement Sci* 2013;8:115.
18. Kilbride C, Norris M, Theis N, et al. Action for Rehabilitation from Neurological Injury (ARNI): A pragmatic study of functional training for stroke survivors. *Open J Ther Rehabil* 2013;1:40-51.
19. Poltawski L, Briggs J, Forster A, et al. Informing the design of a randomised controlled trial of an exercise-based programme for long term stroke survivors: lessons from a before-and-after case series study. *BMC Res Notes* 2013;6:324.

- 1
- 2
- 3 20. Norris M, Kilbride C, Mohagheghi A, et al. A Qualitative Exploration of Participation in an
- 4 Exercise Instructor Led Functional Training Programme for Community Dwelling Stroke
- 5 Survivors. *Int J Ther Rehabil* 2013;20(12):597-605.
- 6
- 7 21. Eldridge SM, Chan CL, Campbell MJ, et al. CONSORT 2010 statement: extension to
- 8 randomised pilot and feasibility trials. *BMJ* 2016;355.
- 9
- 10 22. Dean SG, Poltawski L, Forster A, et al. Community-based Rehabilitation Training after
- 11 stroke: protocol of a pilot randomised controlled trial (ReTrain). *BMJ Open* 2016;6(10).
- 12 23. Stroke Association. Exercise and stroke London2013 [Available from:
- 13 [https://www.stroke.org.uk/sites/default/files/exercise\\_and\\_stroke.pdf](https://www.stroke.org.uk/sites/default/files/exercise_and_stroke.pdf) accessed 24 05
- 14 2017 2017.
- 15
- 16 24. ACSM. American College of Sports Medicine Guidelines for Exercise Testing and
- 17 Prescription. Philadelphia: American College of Sports Medicine, 2005.
- 18 25. Carnes D, Mullinger B, Underwood M. Defining adverse events in manual therapies: A
- 19 modified Delphi consensus study. *Man Ther* 2010;15(1);2-6.
- 20 26. Green J, Forster A, Young J. A test-retest reliability study of the Barthel Index, the
- 21 Rivermead Mobility Index, the Nottingham Extended Activities of Daily Living Scale and
- 22 the Frenchay Activities Index in stroke patients. *Disabil Rehabil* 2001;23(15):670-6.
- 23 27. Hsieh CL, Hsueh IP, Mao HF. Validity and responsiveness of the rivermead mobility index
- 24 in stroke patients. *Scand J Rehabil Med* 2000;32(3):140-2.
- 25 28. Ng SS, Hui-Chan CW. The timed up & go test: its reliability and association with lower-
- 26 limb impairments and locomotor capacities in people with chronic stroke. *Arch Phys Med*
- 27 *Rehabil* 2005;86(8):1641-7.
- 28
- 29 29. Stratford P, Gill C, Westaway M, et al. Assessing Disability and Change on Individual
- 30 Patients: A Report of a Patient Specific Measure. *Physiother Can* 1995;47(4):258-63.
- 31 30. Jones F, Partridge C, Reid F. The Stroke Self-Efficacy Questionnaire: measuring individual
- 32 confidence in functional performance after stroke. *J Clin Nurs* 2008;17(7b):244-52.
- 33 31. Michielsen HJ, De Vries J, Van Heck GL. Psychometric qualities of a brief self-rated
- 34 fatigue measure: The Fatigue Assessment Scale. *J Psychosom Res* 2003;54(4):345-52.
- 35 32. Mead G, Lynch J, Greig C, et al. Evaluation of fatigue scales in stroke patients. *Stroke*
- 36 2007;38(7):2090-5.
- 37 33. Shaughnessy M, Resnick BM, Macko RF. Reliability and validity testing of the short self-
- 38 efficacy and outcome expectation for exercise scales in stroke survivors. *J Stroke*
- 39 *Cerebrovasc Dis* 2004;13(5):214-9.
- 40 34. Bohannon RW, Maljanian R, Lee N, et al. Measurement properties of the short form (SF)-
- 41 12 applied to patients with stroke. *Int J Rehabil Res* 2004;27(2):151-4.
- 42 35. Herdman M, Gudex C, Lloyd A, et al. Development and preliminary testing of the new
- 43 five-level version of EQ-5D (EQ-5D-5L). *Qual Life Res* 2011;20(10):1727-36.
- 44 36. Williams LS, Weinberger M, Harris LE, et al. Development of a stroke-specific quality of
- 45 life scale. *Stroke* 1999;30(7):1362-9.
- 46 37. Thornton M, Travis SS. Analysis of the reliability of the modified caregiver strain index. *J*
- 47 *Gerontol B, Psychol Sci Soc Sci* 2003;58(2):S127-32.
- 48 38. Craig LE, Wu O, Bernhardt J, et al. Approaches to economic evaluations of stroke
- 49 rehabilitation. *Int J Stroke* 2014;9(1):88-100.
- 50 39. Browne RH. On the use of a pilot sample for sample size determination. *Stat Med*
- 51 1995;14(17):1933-4.
- 52
- 53
- 54
- 55
- 56
- 57
- 58
- 59
- 60

- 1  
2  
3 40. Bruno A, Akinwuntan AE, Lin C, et al. Simplified Modified Rankin Scale Questionnaire:  
4 Reproducibility Over the Telephone and Validation With Quality of Life. *Stroke* 2011;  
5 42(8)2276-9.  
6  
7 41. Hislop J, Adewuyi TE, Vale LD, et al. Methods for specifying the target difference in a  
8 randomised controlled trial: the Difference ELicitation in TriAls (DELTA) systematic  
9 review. *PLoS Med* 2014;11(5):e1001645.  
10 42. McKenna S, Jones F, Glenfield P, et al. Bridges self-management program for people with  
11 stroke in the community: A feasibility randomized controlled trial. *Int J Stroke*  
12 2015;10(5):697-704.  
13 43. Wade DT. Outcome measures for clinical rehabilitation trials: impairment, function,  
14 quality of life, or value? *Am J Phys Med Rehabil* 2003;82(10 Suppl):S26-31.  
15 44. Rehabilitation Institute of Chicago. Rehabilitation Measures Database - Stroke Impact  
16 Scale [Available from:  
17 <http://www.rehabmeasures.org/Lists/RehabMeasures/DispForm.aspx?ID=934> accessed  
18 21 06 2017.  
19  
20 45. Saywell N, Vandal AC, Brown P, et al. Telerehabilitation to improve outcomes for people with  
21 stroke: study protocol for a randomised controlled trial. *Trials* 2012;13(1):233.  
22  
23  
24  
25  
26  
27  
28  
29  
30  
31  
32  
33  
34  
35  
36  
37  
38  
39  
40  
41  
42  
43  
44  
45  
46  
47  
48  
49  
50  
51  
52  
53  
54  
55  
56  
57  
58  
59  
60



1  
2  
3  
4  
5  
6  
7  
8  
9  
10  
11  
12  
13  
14  
15  
16  
17  
18  
19  
20  
21  
22  
23  
24  
25  
26  
27  
28  
29  
30  
31  
32  
33  
34  
35  
36  
37  
38  
39  
40  
41  
42  
43  
44  
45  
46  
47  
48  
49  
50  
51  
52  
53  
54  
55  
56  
57  
58  
59  
60

Figure 1a – Recruitment and randomisation by cohort

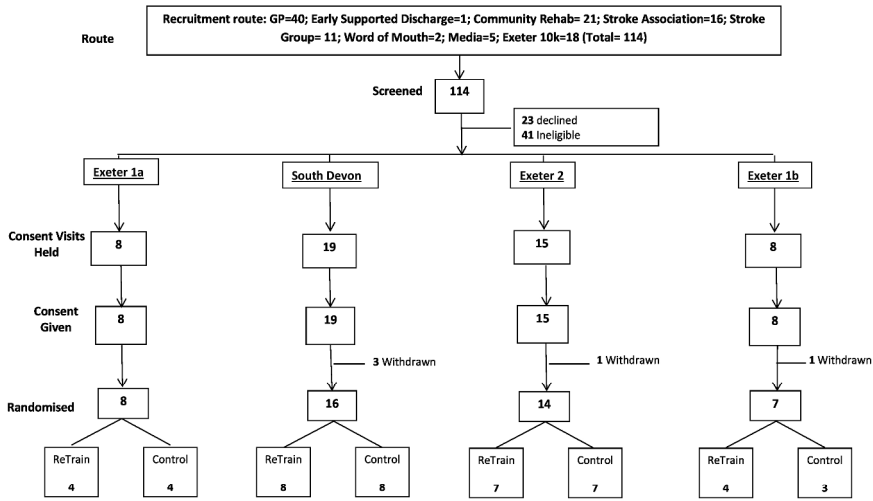

Figure 1a - Recruitment and randomisation by cohort

297x209mm (300 x 300 DPI)

Review only

1  
2  
3  
4  
5  
6  
7  
8  
9  
10  
11  
12  
13  
14  
15  
16  
17  
18  
19  
20  
21  
22  
23  
24  
25  
26  
27  
28  
29  
30  
31  
32  
33  
34  
35  
36  
37  
38  
39  
40  
41  
42  
43  
44  
45  
46  
47  
48  
49  
50  
51  
52  
53  
54  
55  
56  
57  
58  
59  
60

Figure 1b – Participant flow through the trial

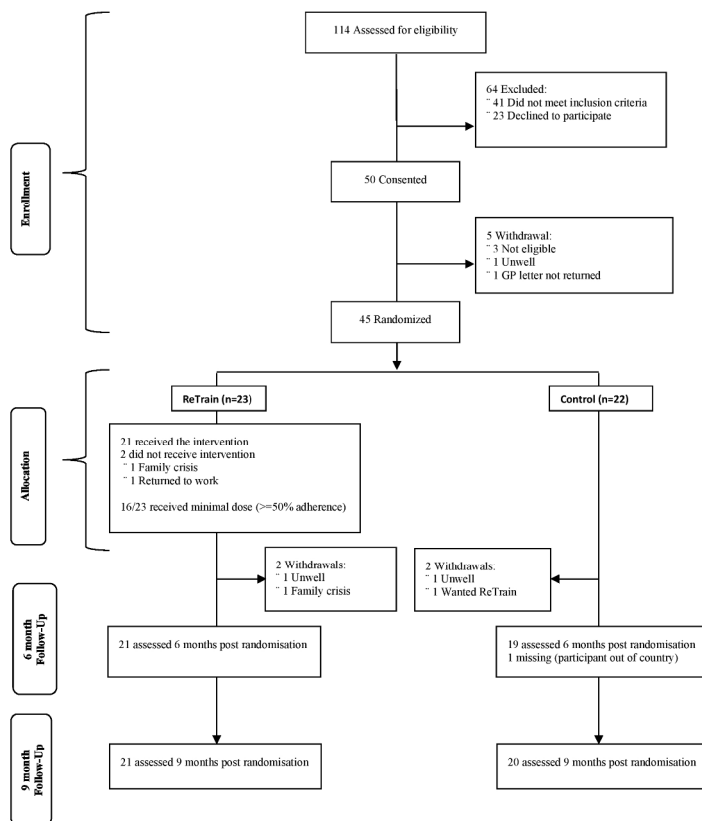

Figure 1b - Participant flow through the trial

209x297mm (300 x 300 DPI)

## RESEARCH METHODS AND REPORTING

Table 2 | CONSORT checklist of information to include when reporting a pilot trial

| Section/topic and Item No         | Standard checklist item                                                                                                                                                                     | Extension for pilot trials                                                                                                                                   | Page No where item is reported |
|-----------------------------------|---------------------------------------------------------------------------------------------------------------------------------------------------------------------------------------------|--------------------------------------------------------------------------------------------------------------------------------------------------------------|--------------------------------|
| <b>Title and abstract</b>         |                                                                                                                                                                                             |                                                                                                                                                              |                                |
| 1a                                | Identification as a randomised trial in the title                                                                                                                                           | Identification as a pilot or feasibility randomised trial in the title                                                                                       | 1                              |
| 1b                                | Structured summary of trial design, methods, results, and conclusions (for specific guidance see CONSORT for abstracts)                                                                     | Structured summary of pilot trial design, methods, results, and conclusions (for specific guidance see CONSORT abstract extension for pilot trials)          | 2                              |
| <b>Introduction</b>               |                                                                                                                                                                                             |                                                                                                                                                              |                                |
| Background and objectives:        |                                                                                                                                                                                             |                                                                                                                                                              |                                |
| 2a                                | Scientific background and explanation of rationale                                                                                                                                          | Scientific background and explanation of rationale for future definitive trial, and reasons for randomised pilot trial                                       | 4                              |
| 2b                                | Specific objectives or hypotheses                                                                                                                                                           | Specific objectives or research questions for pilot trial                                                                                                    | 4-5                            |
| <b>Methods</b>                    |                                                                                                                                                                                             |                                                                                                                                                              |                                |
| Trial design:                     |                                                                                                                                                                                             |                                                                                                                                                              |                                |
| 3a                                | Description of trial design (such as parallel, factorial) including allocation ratio                                                                                                        | Description of pilot trial design (such as parallel, factorial) including allocation ratio                                                                   | 5                              |
| 3b                                | Important changes to methods after trial commencement (such as eligibility criteria), with reasons                                                                                          | Important changes to methods after pilot trial commencement (such as eligibility criteria), with reasons                                                     | N/A                            |
| Participants:                     |                                                                                                                                                                                             |                                                                                                                                                              |                                |
| 4a                                | Eligibility criteria for participants                                                                                                                                                       |                                                                                                                                                              | 5                              |
| 4b                                | Settings and locations where the data were collected                                                                                                                                        |                                                                                                                                                              | 5-6                            |
| 4c                                |                                                                                                                                                                                             | How participants were identified and consented                                                                                                               | 5                              |
| Interventions:                    |                                                                                                                                                                                             |                                                                                                                                                              |                                |
| 5                                 | The interventions for each group with sufficient details to allow replication, including how and when they were actually administered                                                       |                                                                                                                                                              | 5-6                            |
| Outcomes:                         |                                                                                                                                                                                             |                                                                                                                                                              |                                |
| 6a                                | Completely defined prespecified primary and secondary outcome measures, including how and when they were assessed                                                                           | Completely defined prespecified assessments or measurements to address each pilot trial objective specified in 2b, including how and when they were assessed | 6                              |
| 6b                                | Any changes to trial outcomes after the trial commenced, with reasons                                                                                                                       | Any changes to pilot trial assessments or measurements after the pilot trial commenced, with reasons                                                         | N/A                            |
| 6c                                |                                                                                                                                                                                             | If applicable, prespecified criteria used to judge whether, or how, to proceed with future definitive trial                                                  | N/A                            |
| Sample size:                      |                                                                                                                                                                                             |                                                                                                                                                              |                                |
| 7a                                | How sample size was determined                                                                                                                                                              | Rationale for numbers in the pilot trial                                                                                                                     | 6-7                            |
| 7b                                | When applicable, explanation of any interim analyses and stopping guidelines                                                                                                                |                                                                                                                                                              | N/A                            |
| Randomisation:                    |                                                                                                                                                                                             |                                                                                                                                                              |                                |
| Sequence generation:              |                                                                                                                                                                                             |                                                                                                                                                              |                                |
| 8a                                | Method used to generate the random allocation sequence                                                                                                                                      |                                                                                                                                                              | 7                              |
| 8b                                | Type of randomisation; details of any restriction (such as blocking and block size)                                                                                                         | Type of randomisation(s); details of any restriction (such as blocking and block size)                                                                       | 7                              |
| Allocation concealment mechanism: |                                                                                                                                                                                             |                                                                                                                                                              |                                |
| 9                                 | Mechanism used to implement the random allocation sequence (such as sequentially numbered containers), describing any steps taken to conceal the sequence until interventions were assigned |                                                                                                                                                              | 7                              |
| Implementation:                   |                                                                                                                                                                                             |                                                                                                                                                              |                                |
| 10                                | Who generated the random allocation sequence, enrolled participants, and assigned participants to interventions                                                                             |                                                                                                                                                              | 7                              |
| Blinding:                         |                                                                                                                                                                                             |                                                                                                                                                              |                                |
| 11a                               | If done, who was blinded after assignment to interventions (eg, participants, care providers, those assessing outcomes) and how                                                             |                                                                                                                                                              | 7                              |
| 11b                               | If relevant, description of the similarity of interventions                                                                                                                                 |                                                                                                                                                              | N/A                            |
| Analytical methods:               |                                                                                                                                                                                             |                                                                                                                                                              |                                |
| 12a                               | Statistical methods used to compare groups for primary and secondary outcomes                                                                                                               | Methods used to address each pilot trial objective whether qualitative or quantitative                                                                       | 7                              |
| 12b                               | Methods for additional analyses, such as subgroup analyses and adjusted analyses                                                                                                            | Not applicable                                                                                                                                               | N/A                            |

**RESEARCH METHODS AND REPORTING**

**Table 2 | CONSORT checklist of information to include when reporting a pilot trial**

| Section/topic and Item No                             | Standard checklist item                                                                                                                           | Extension for pilot trials                                                                                                                                                            | Page No where item is reported |
|-------------------------------------------------------|---------------------------------------------------------------------------------------------------------------------------------------------------|---------------------------------------------------------------------------------------------------------------------------------------------------------------------------------------|--------------------------------|
| <b>Results</b>                                        |                                                                                                                                                   |                                                                                                                                                                                       |                                |
| Participant flow (a diagram is strongly recommended): |                                                                                                                                                   |                                                                                                                                                                                       |                                |
| 13a                                                   | For each group, the numbers of participants who were randomly assigned, received intended treatment, and were analysed for the primary outcome    | For each group, the numbers of participants who were approached and/or assessed for eligibility, randomly assigned, received intended treatment, and were assessed for each objective | Figure 1a & 1b<br>p. 8         |
| 13b                                                   | For each group, losses and exclusions after randomisation, together with reasons                                                                  |                                                                                                                                                                                       | Figure 1a & 1b<br>p. 10        |
| <b>Recruitment:</b>                                   |                                                                                                                                                   |                                                                                                                                                                                       |                                |
| 14a                                                   | Dates defining the periods of recruitment and follow-up                                                                                           |                                                                                                                                                                                       | 8                              |
| 14b                                                   | Why the trial ended or was stopped                                                                                                                | Why the pilot trial ended or was stopped                                                                                                                                              | N/A                            |
| <b>Baseline data:</b>                                 |                                                                                                                                                   |                                                                                                                                                                                       |                                |
| 15                                                    | A table showing baseline demographic and clinical characteristics for each group                                                                  |                                                                                                                                                                                       | 8-10                           |
| <b>Numbers analysed:</b>                              |                                                                                                                                                   |                                                                                                                                                                                       |                                |
| 16                                                    | For each group, number of participants (denominator) included in each analysis and whether the analysis was by original assigned groups           | For each objective, number of participants (denominator) included in each analysis. If relevant, these numbers should be by randomised group                                          | Figure 1b                      |
| <b>Outcomes and estimation:</b>                       |                                                                                                                                                   |                                                                                                                                                                                       |                                |
| 17a                                                   | For each primary and secondary outcome, results for each group, and the estimated effect size and its precision (such as 95% confidence interval) | For each objective, results including expressions of uncertainty (such as 95% confidence interval) for any estimates. If relevant, these results should be by randomised group        | N/A                            |
| 17b                                                   | For binary outcomes, presentation of both absolute and relative effect sizes is recommended                                                       | Not applicable                                                                                                                                                                        | N/A                            |
| <b>Ancillary analyses:</b>                            |                                                                                                                                                   |                                                                                                                                                                                       |                                |
| 18                                                    | Results of any other analyses performed, including subgroup analyses and adjusted analyses, distinguishing prespecified from exploratory          | Results of any other analyses performed that could be used to inform the future definitive trial                                                                                      | 10-15                          |
| <b>Harms:</b>                                         |                                                                                                                                                   |                                                                                                                                                                                       |                                |
| 19                                                    | All important harms or unintended effects in each group (for specific guidance see CONSORT for harms)                                             |                                                                                                                                                                                       | 16                             |
| 19a                                                   |                                                                                                                                                   | If relevant, other important unintended consequences                                                                                                                                  | N/A                            |
| <b>Discussion</b>                                     |                                                                                                                                                   |                                                                                                                                                                                       |                                |
| <b>Limitations:</b>                                   |                                                                                                                                                   |                                                                                                                                                                                       |                                |
| 20                                                    | Trial limitations, addressing sources of potential bias, imprecision, and, if relevant, multiplicity of analyses                                  | Pilot trial limitations, addressing sources of potential bias and remaining uncertainty about feasibility                                                                             | 17-18                          |
| <b>Generalisability:</b>                              |                                                                                                                                                   |                                                                                                                                                                                       |                                |
| 21                                                    | Generalisability (external validity, applicability) of the trial findings                                                                         | Generalisability (applicability) of pilot trial methods and findings to future definitive trial and other studies                                                                     | 18                             |
| <b>Interpretation:</b>                                |                                                                                                                                                   |                                                                                                                                                                                       |                                |
| 22                                                    | Interpretation consistent with results, balancing benefits and harms, and considering other relevant evidence                                     | Interpretation consistent with pilot trial objectives and findings, balancing potential benefits and harms, and considering other relevant evidence                                   | 18-19                          |
| 22a                                                   |                                                                                                                                                   | Implications for progression from pilot to future definitive trial, including any proposed amendments                                                                                 | 19                             |
| <b>Other information</b>                              |                                                                                                                                                   |                                                                                                                                                                                       |                                |
| <b>Registration:</b>                                  |                                                                                                                                                   |                                                                                                                                                                                       |                                |
| 23                                                    | Registration number and name of trial registry                                                                                                    | Registration number for pilot trial and name of trial registry                                                                                                                        | 2, 19                          |
| <b>Protocol:</b>                                      |                                                                                                                                                   |                                                                                                                                                                                       |                                |
| 24                                                    | Where the full trial protocol can be accessed, if available                                                                                       | Where the pilot trial protocol can be accessed, if available                                                                                                                          | 19                             |
| <b>Funding:</b>                                       |                                                                                                                                                   |                                                                                                                                                                                       |                                |
| 25                                                    | Sources of funding and other support (such as supply of drugs), role of funders                                                                   |                                                                                                                                                                                       | 2, 19                          |
| 26                                                    |                                                                                                                                                   | Ethical approval or approval by research review committee, confirmed with reference number                                                                                            | 19                             |

# BMJ Open

## Community-based Rehabilitation Training after stroke: Results of a pilot randomised controlled trial (ReTrain) investigating acceptability and feasibility

|                                 |                                                                                                                                                                                                                                                                                                                                                                                                                                                                                                                                                                                                                                                                                                                                                                                                                              |
|---------------------------------|------------------------------------------------------------------------------------------------------------------------------------------------------------------------------------------------------------------------------------------------------------------------------------------------------------------------------------------------------------------------------------------------------------------------------------------------------------------------------------------------------------------------------------------------------------------------------------------------------------------------------------------------------------------------------------------------------------------------------------------------------------------------------------------------------------------------------|
| Journal:                        | <i>BMJ Open</i>                                                                                                                                                                                                                                                                                                                                                                                                                                                                                                                                                                                                                                                                                                                                                                                                              |
| Manuscript ID                   | bmjopen-2017-018409.R1                                                                                                                                                                                                                                                                                                                                                                                                                                                                                                                                                                                                                                                                                                                                                                                                       |
| Article Type:                   | Research                                                                                                                                                                                                                                                                                                                                                                                                                                                                                                                                                                                                                                                                                                                                                                                                                     |
| Date Submitted by the Author:   | 24-Aug-2017                                                                                                                                                                                                                                                                                                                                                                                                                                                                                                                                                                                                                                                                                                                                                                                                                  |
| Complete List of Authors:       | Dean, Sarah; PenCLAHRC University of Exeter Medical School, Poltawski, Leon; University of Exeter Medical School<br>Forster, Anne; University of Leeds, Academic Unit of Elderly Care and Rehabilitation<br>Taylor, Rod; University of Exeter, Peninsula Medical School<br>Spencer, Anne<br>James, Martin; South West NHS Trust<br>Allison, Rhoda; Torbay and Southern Devon Health and Care NHS Trust<br>Stevens, Shirley; University of Exeter Medical School<br>Norris, Meriel; Brunel University London<br>Shepherd, Anthony; University of Portsmouth, Sport and Exercise Science<br>Landa, P; University of Exeter, Medical School<br>Pulsford, Richard; University of Exeter, Sports and Health Science<br>Hollands, Laura; University of Exeter Medical School<br>Calitri, Raff; University of Exeter Medical School |
| <b>Primary Subject Heading</b>: | Rehabilitation medicine                                                                                                                                                                                                                                                                                                                                                                                                                                                                                                                                                                                                                                                                                                                                                                                                      |
| Secondary Subject Heading:      | Cardiovascular medicine, Health services research                                                                                                                                                                                                                                                                                                                                                                                                                                                                                                                                                                                                                                                                                                                                                                            |
| Keywords:                       | STROKE MEDICINE, REHABILITATION MEDICINE, Clinical trials < THERAPEUTICS                                                                                                                                                                                                                                                                                                                                                                                                                                                                                                                                                                                                                                                                                                                                                     |
|                                 |                                                                                                                                                                                                                                                                                                                                                                                                                                                                                                                                                                                                                                                                                                                                                                                                                              |

SCHOLARONE™  
Manuscripts

**Title** Community-based Rehabilitation Training after stroke: Results of a pilot randomised controlled trial (ReTrain) investigating acceptability and feasibility

Sarah G Dean<sup>1</sup>, Leon Poltawski<sup>1</sup>, Anne Forster<sup>2</sup>, Rod S Taylor<sup>1</sup>, Anne Spencer<sup>1</sup>, Martin James<sup>1,3</sup>, Rhoda Allison<sup>4</sup>, Shirley Stevens<sup>1</sup>, Meriel Norris<sup>5</sup>, Anthony I Shepherd<sup>6</sup>, Paolo Landa<sup>1</sup>, Richard M Pulsford<sup>7</sup>, Laura Hollands<sup>1</sup>, Raff Calitri<sup>1</sup>.

<sup>1</sup>University of Exeter Medical School, Exeter, EX1 2LU, UK.

<sup>2</sup>Academic Unit of Elderly Care and Rehabilitation, University of Leeds, Bradford, BD9 6RJ, UK.

<sup>3</sup>Royal Devon & Exeter Hospital, Exeter, EX2 5DW, UK.

<sup>4</sup>Torbay and South Devon NHS Foundation Trust, Torquay, TQ2 7TD, UK.

<sup>5</sup>Department of Clinical Sciences, Brunel University London, Middlesex UB8 3PH, UK.

<sup>6</sup> Department of Sport and Exercise Science, University of Portsmouth, Portsmouth, PO1 2ER.

<sup>7</sup>Sports & Health Sciences, University of Exeter, Exeter, EX1 2LU, UK.

**Corresponding author**

Associate Professor Sarah Dean,

Psychology Applied to Rehabilitation and Health,

University of Exeter Medical School,

College House

St Luke's Campus,

Exeter,

EX1 2LU,

Email: [s.dean@exeter.ac.uk](mailto:s.dean@exeter.ac.uk)

01392 722984

**Word count 4484 exc tables**

1  
2  
3  
4  
5  
6  
7  
8 **Key words:** Stroke, Rehabilitation Medicine, Clinical Trials.

9  
10 **Abstract**

11 **Objectives:** To assess acceptability and feasibility of trial processes and the ReTrain  
12 intervention including an assessment of intervention fidelity. **Design:** A two-group, assessor-  
13 blinded, randomised controlled trial with parallel mixed methods process and economic  
14 evaluations. **Setting:** Community settings across two sites in Devon. **Participants:** Eligible  
15 participants were: 18 years old or over, with a diagnosis of stroke and with self-reported  
16 mobility issues, no contraindications to physical activity, discharged from National Health  
17 Service (NHS) or any other formal rehabilitation programme at least 1 month prior, willing  
18 to be randomised to either control or ReTrain and attend the training venue, possessing  
19 cognitive capacity and communication ability sufficient to participate. Participants were  
20 individually randomised (1:1) via a computer generated randomisation sequence minimised  
21 for time since stroke and level of functional disability. Only outcome assessors independent  
22 of the research team were blinded to group allocation. **Interventions:** ReTrain comprised (1)  
23 an introductory one-to-one session; (2) ten, twice weekly group classes with up to two  
24 trainers and eight clients; (3) a closing one-to-one session, followed by three drop-in  
25 sessions over the subsequent three months. Participants received a bespoke home-based  
26 training programme. All participants received treatment as usual. The control group  
27 received an exercise after stroke advice booklet. **Outcome measures:** Candidate primary  
28 outcomes included functional mobility and physical activity. **Results:** Forty-five participants  
29 were randomised (ReTrain=23; Control=22); data were available from 40 participants at six  
30 months follow-up (ReTrain=21; Control=19) and 41 at nine months follow-up (ReTrain=21;  
31 Control=20). We demonstrated ability to recruit and retain participants. Participants were  
32 not burdened by the requirements of the study. We were able to calculate sample estimates  
33 for candidate primary outcomes and test procedures for process and health economic  
34 evaluations. **Conclusions:** All objectives were fulfilled and indicated that a definitive trial of  
35 ReTrain is feasible and acceptable.

36  
37  
38  
39  
40  
41  
42  
43  
44  
45  
46 **Registration:** ClinicalTrials.gov: trial number NCT02429180.

47  
48 **Funding:** The Stroke Association TSA 2014-13

**Strengths and limitations of this study**

- A community-based exercise intervention after stroke developed with service users
- A pilot randomised trial developed following MRC guidelines on complex interventions
- Mixed-method approach for answering feasibility and acceptability objectives
- Objective physical activity capture via accelerometry but subjective self-report outcomes for functional mobility and psycho-social measurements

For peer review only



## Introduction

Five years after initial stroke, one in three individuals have residual physical impairment<sup>1</sup>, equating to over 300,000 individuals in the United Kingdom (UK) living with disability from stroke<sup>2</sup>. Provision of stroke rehabilitation is typically front loaded, with resources focussed on in-patient care and early supported discharge. Support tapers off after a few months<sup>3</sup> with many individuals reporting unmet long-term needs<sup>4</sup>.

The National Clinical Guideline for Stroke advise for secondary prevention that stroke survivors engage in 150 minutes of physical activity a week, in bouts of 10 minutes or more, starting light and developing across time to moderate levels of intensity<sup>5</sup>. However, many stroke survivors do not meet these recommendations<sup>6 7</sup> due to combinations of personal (e.g., physical or psychological impairments) and environmental factors (e.g., lack of programmes and facilities). To address this problem, community-based programmes are promoted<sup>8-10</sup>. These tend to focus on cardiovascular fitness with less emphasis on functional improvements or on promoting on-going exercise self-management. National stroke guidelines<sup>5</sup> identify the importance of interventions for functional improvement<sup>11</sup> and self-management<sup>12</sup> but evidence is lacking regarding these types of intervention<sup>13</sup>.

Action for Rehabilitation following Neurological Injury (ARNI) is an approach aimed at improving function and facilitating self-management<sup>14</sup> and has a detailed self-help book. The ARNI approach embodies a set of principles (e.g. instilling a commitment to regular exercise) and techniques tailored to individual need. The ARNI Institute trains registered exercise professionals to deliver key ARNI techniques. Clinical Commissioning Groups (CCGs), charitable, and local authorities have started to provide community-based ARNI training for stroke survivors, which has been positively received by participants, carers and practitioners<sup>15</sup>, however there is currently no randomised controlled trial (RCT) evidence for evaluating its impact on stroke outcomes or its cost-effectiveness.

## Background and objectives

Using the Medical Research Council's framework for the development and evaluation of complex interventions<sup>16</sup> and considerable Patient and Public Involvement we have designed a testable programme called Rehabilitation Training (ReTrain)<sup>17-20</sup>. ReTrain is a community-based, manualised group programme combining ARNI principles and key techniques with best practice guidelines for stroke<sup>9 17</sup>. The overall aim of our pilot RCT was to inform the design and delivery of a definitive RCT. Our objectives were to: 1) assess feasibility and acceptability of recruitment, randomisation, allocation concealment and outcome assessment blinding; 2) determine retention rates; 3) check ReTrain's acceptability and feasibility for participants, and refine the Trainer Manual; 4) test candidate outcome measures, assess their burden, levels of completion, and estimate outcome variance (to inform definitive trial sample size); 5) perform process evaluation including intervention

1  
2  
3 fidelity assessment; 6) calculate ReTrain costs and assess feasibility of collecting health and  
4 social service resource use.  
5

## 6 **Methods**

7  
8 A brief methods overview is provided in accordance with guidance for reporting pilot  
9 trials<sup>21</sup>; further details are available in the published protocol<sup>22</sup>. Ethics review was  
10 conducted by National Research Ethics Service Committee South West Cornwall & Plymouth  
11 (REC Ref: 15/SW/04).  
12  
13

### 14 **Trial design**

15  
16 ReTrain was a two-group, assessor-blinded, randomised controlled external pilot trial with  
17 parallel mixed methods process and economic evaluations. Eligible participants were  
18 individually randomised 1:1 to intervention (ReTrain) or control (exercise advice booklet<sup>23</sup>).  
19  
20  
21

### 22 **Participants**

23  
24 Inclusion criteria were: i) diagnosis of stroke; ii) any time since stroke but at least 1 month  
25 since discharge from NHS physical rehabilitation services; iii) able to walk independently  
26 indoors with or without mobility aids, but with self-reported difficulty with stairs, slopes or  
27 uneven surfaces; iv) willingness to be randomised and attend the training venue; v)  
28 cognitive capacity and communication ability sufficient to participate.  
29  
30

31  
32 Exclusion criteria were: less than 18 years old, currently (or within one month of) receiving  
33 ARNI training or have contraindications to moderate to vigorous physical activity (adapted  
34 from American College of Sports Medicine guidelines<sup>24</sup>). Participants were recruited from  
35 two CCGs. Participants were identified by: (1) clinicians in NHS primary care, hospital and  
36 community stroke services; (2) contacts in the local Clinical Research Network and Clinical  
37 Research Facility; (3) promotion via local stroke support networks (e.g. Stroke Association);  
38 (4) word of mouth, study flyers and adverts.  
39  
40  
41

### 42 **Intervention**

43  
44 ReTrain aims to: (1) enhance function through task-related practice, teaching compensatory  
45 techniques, and providing targeted strength training (cardiovascular fitness gains also occur  
46 through these activities); (2) develop self-management skills for on-going rehabilitation; (3)  
47 deliver personalised training using negotiated goals and (4) instil a commitment to regular  
48 exercise for health improvement and longer-term maintenance. ReTrain facilitates safe and  
49 efficient practice of walking in varied terrains, kerbs, cambers and in crowds, turning and  
50 moving quickly, climbing steps and stairs without rails, getting to and from the floor without  
51 furniture or other aids, and moving without mobility aids or while carrying loads. Training is  
52 based on a manual and led by personal trainers on the UK Register of Exercise Professionals  
53 (level 3 or above) who are ARNI-trained and accredited and have had additional training in  
54 the delivery of ReTrain. There was a maximum ratio of one trainer to four stroke survivors.  
55  
56  
57  
58  
59  
60

1  
2  
3 ReTrain was delivered in a community setting (one gym, two church halls, one community  
4 centre) with twice weekly two hour sessions over three months, comprising: an introductory  
5 one-to-one session (home visit); ten, twice-weekly group classes with up to two trainers and  
6 eight clients (training venue); a closing one-to-one session (home visit); followed by three  
7 (one per month) drop-in sessions. Participants completed bespoke home-based training  
8 (homework) throughout.  
9  
10

## 11 Control

12 All participants received treatment as usual. This ranged from zero treatment to  
13 engagement with any health service(s). We requested that all trial participants did not  
14 participate in additional physical rehabilitation (either NHS or private) but we could not  
15 prevent them from doing so. We did not monitor control group participation in any  
16 treatments during the trial but did record health service use at the end of the trial for all  
17 participants. The control group also received an advice booklet about exercise after stroke<sup>23</sup>.  
18  
19  
20  
21  
22

## 23 Outcomes

24  
25 **Feasibility, acceptability and process outcomes:** numbers and details of those approached;  
26 recruitment and retention figures. **Acceptability of randomisation, outcome measurement**  
27 **burden, and the intervention:** completion of questionnaires and objective assessments;  
28 interviews with ten intervention and ten control group members, and the trainers. **Safety:**  
29 Adverse events<sup>25</sup> identified via trainer and ReTrain participants (during the programme) and  
30 participant reports (all participants during 6 and 9-month assessments). **Intervention**  
31 **fidelity:** attendance registers, accelerometry, exercise 'homework' diaries, trainer  
32 completed session checklists and video analysis of (early, middle and late programme)  
33 training sessions.  
34  
35  
36  
37

38 We tested a range of candidate primary and secondary outcome measures. **Primary**  
39 **Outcomes:** Rivermead Mobility Index<sup>26 27</sup>; Timed Up and Go Test<sup>28</sup>; modified Patient-Specific  
40 Functional Scale<sup>29</sup>; 7-day objective physical activity levels using wrist-worn accelerometry  
41 (GENEActiv, Activinsights, Kimbolton, Cambridge UK) and a physical activity diary. **Secondary**  
42 **Outcomes:** Stroke Self-efficacy Questionnaire<sup>30</sup>; Fatigue Assessment Scale<sup>31 32</sup>; exercise  
43 beliefs and exercise self-efficacy questionnaires<sup>33</sup>; SF12<sup>34</sup>; EQ-5D-5L<sup>35</sup>; Stroke Quality of Life  
44 (QoL) questionnaires<sup>36</sup>; Carer Burden Index<sup>37</sup>; and Health and Social Service use through a  
45 Service Receipt Inventory<sup>38</sup>.  
46  
47  
48  
49

50 Physical outcome baseline assessments (completed by research team) and follow-up  
51 assessments (at 6 and 9-months, completed by blinded assessor) were conducted in the  
52 participant's home. Researchers visited participants to fit the accelerometer, drop off  
53 questionnaires and diary one week prior to blind assessor visits. Assessors administered  
54 primary outcome physical measures and collected accelerometers, questionnaires and  
55 diaries.  
56  
57  
58  
59  
60

### Sample size

We required 48 participants (24 per group) as (a) 30 complete data sets are recommended for pilot studies to estimate outcome variance<sup>39</sup> and (b) we wanted to investigate variations in context by running the intervention three times (*i.e.* 3 x 8 patients). This number also allowed estimation of a predicted attrition rate of 20% with a precision of  $\pm 5\%$  with 95% certainty.

### Randomisation and blinding

The random sequence was computer generated with minimisation for time since stroke ( $\leq 3$  months versus  $> 3$  months) and level of functional disability (modified Rankin Scale (mRS)<sup>40</sup> score  $\leq 2$  versus  $> 2$ ). Allocation concealment was ensured by using a password protected validated web-based remote randomisation service supported by the Peninsula Clinical Trials Unit (PenCTU). The Trial Manager requested randomisation only after a cohort of participants had been consented.

Participants, trainers providing the intervention, and researchers conducting the process and economic evaluations could not be blinded to allocation. However, outcomes were assessed by independent researchers (not based at research centre) who were blinded to group allocation. Participants were reminded not to reveal their allocation to assessors but any un-blinding was recorded; after assessments assessors were asked to guess participant allocation.

### Data Analysis

Analysis was primarily descriptive with participant flow summarised and estimates of screening, recruitment and attrition reported. Means and standard deviations for all outcomes are reported at baseline, 6 and 9-months follow-up for each group.

Intervention fidelity was assessed using mixed methods: qualitative video analysis comparing the Trainer Manual standard versus observed technique (two researchers independently assessed videos) combined with interview data and summary scores from trainer completed session checklists. Qualitative data were manually analysed descriptively and with content analysis for trial processes; additional thematic analysis was used for interview data. One person (MN) led the qualitative analysis but this was then discussed (MN & SD), checked (RC) and agreed (MN, SD, LP, RC).

We used a micro-costing approach to calculate costs associated with ReTrain: staff time (trainers, administrator, facilitators), venue hire, training equipment (annualised over time), course materials, consumables, travel costs (participants, trainers and facilitators). The costs of the intervention were estimated as a cost per programme and a cost per participant. The estimated costs of the intervention per participant were based on the number of participants enrolled on the programme. The base case scenario assumed the average

number of participants per programme across all cohorts. Sensitivity analyses were conducted using the minimum and maximum number of participants enrolled for the programme and the quantity of programme materials that were wasted. We analysed the relative benefits of calculating health related QoL using SF-6D (developed from the SF-12) over the QALY calculated (using EQ-5D 5L) from the baseline measures.

Sample size estimates for a definitive trial were calculated for candidate primary outcomes using the standard deviation observed in this pilot population and published minimal clinical important difference (MCID) at 90% power and 5% alpha, and assuming 20% attrition. Where no published MCID could be sourced, we assumed a small to moderate effect size of 0.4 of a standard deviation<sup>41</sup>. The trial statistician undertook calculations using the 'samspi' command in STATA v14.2

## Results

Recruitment took place from June 2015 to January 2016. The intervention ran in four cohorts, participant flows are shown for each (Figure 1) and for the trial overall (Figure 2). Initial recruitment was slow so to prevent late running of the trial we split the first cohort. Six-month follow-up outcome assessments took place January to July 2016 and 9-month follow-up April to October 2016.

**Objective 1:** *Assess the feasibility and acceptability of recruitment, randomisation, allocation concealment and processes for outcome assessment and blinding*

We screened 115 individuals to recruit 50 participants (Figure 1) in 8 months (2 months ahead of schedule). Of these, 45 (90%) were randomised (Figure 1 and 2). Five individuals withdrew prior to randomisation due to ill health or the time lag between agreeing to take part and a cohort being ready to randomise. Table 1 shows baseline characteristics of those randomised, indicating a balance of characteristics across trial arms.

**Table 1** Baseline participant demographics

|                                        | ReTrain<br>(N= 23) | Control<br>(N=22) |
|----------------------------------------|--------------------|-------------------|
| <b>Gender, n</b>                       |                    |                   |
| Male (%)                               | 16 (70%)           | 14 (67%)          |
| <b>Age (years): mean (SD)</b>          | 70 (12)            | 71 (10)           |
| <b>Age Category (N=45): n (%)</b>      |                    |                   |
| <45                                    | 1 (4%)             | 0 (%)             |
| 46-50                                  | 0 (0%)             | 1 (5%)            |
| 51-60                                  | 3 (13%)            | 2 (9%)            |
| 61-70                                  | 10 (43%)           | 6 (27%)           |
| 71-80                                  | 5 (22 %)           | 8 (36%)           |
| 81-90                                  | 2 (9%)             | 5 (23%)           |
| 90+                                    | 2 (9%)             | 0 (0%)            |
| <b>Time Since Stroke (no. months):</b> |                    |                   |

|                                                                                    |          |           |
|------------------------------------------------------------------------------------|----------|-----------|
| < 12                                                                               | 3 (13%)  | 3 (14%)   |
| 12-24                                                                              | 4 (17%)  | 4 (18%)   |
| 25-48                                                                              | 5 (22%)  | 5 (23%)   |
| 49-72                                                                              | 2 (9%)   | 5 (23%)   |
| 73-96                                                                              | 4 (17%)  | 2 (9%)    |
| 97+                                                                                | 5 (22%)  | 3 (14%)   |
| <b>Time Since Stroke Minimisation Categories (months):n, (%)</b>                   |          |           |
| <=3 months                                                                         | 1 (4%)   | 0 (0%)    |
| >3 months                                                                          | 22 (96%) | 22 (100%) |
| <b>Type of Stroke, n (%)</b>                                                       |          |           |
| Haemorrhagic                                                                       | 3 (13%)  | 1 (5%)    |
| Ischaemic                                                                          | 15 (65%) | 15 (68%)  |
| Both                                                                               | 0 (0%)   | 1 (5%)    |
| Missing                                                                            | 5 (22%)  | 5 (23%)   |
| <b>Stroke Rehabilitation (weeks):</b>                                              |          |           |
| n,                                                                                 | 21,      | 21,       |
| Average no. weeks (SD)                                                             | 8 (9)    | 14 (19)   |
| Median no. weeks                                                                   | 6        | 12        |
| Range                                                                              | 0-32     | 0-88      |
| Unknown length rehab: n                                                            | 2        | 1         |
| <b>Functional Disability (Simplified Modified Rankin Scale score- sMRS): n (%)</b> |          |           |
| 0                                                                                  | 1 (4%)   | 0 (0%)    |
| 1                                                                                  | 2 (9%)   | 1 (5%)    |
| 2                                                                                  | 4 (17%)  | 9 (41%)   |
| 3                                                                                  | 16 (70%) | 12(55%)   |
| <b>sMRS minimisation categories: n(%)</b>                                          |          |           |
| <=2                                                                                | 7 (30%)  | 10 (45%)  |
| >2                                                                                 | 16 (70%) | 12 (55%)  |
| <b>Co-morbidities<sup>^</sup>, n (%)</b>                                           |          |           |
| Hypertension                                                                       | 18 (78%) | 18 (82%)  |
| Type 2 Diabetes Mellitus                                                           | 4 (17%)  | 4 (18%)   |
| Depression                                                                         | 8 (35%)  | 5 (23%)   |
| Chronic Kidney Disease                                                             | 2 (9%)   | 1 (4%)    |
| Asthma / COPD                                                                      | 4 (17%)  | 3 (14%)   |
| Other                                                                              | 5 (22%)  | 3 (14%)   |
| <b>Medications<sup>^</sup>, n (%)</b>                                              |          |           |
| Diuretics                                                                          | 3 (13%)  | 1 (5%)    |
| Anticoagulants                                                                     | 8 (35%)  | 10 (45%)  |
| Antiplatelet                                                                       | 15 (65%) | 12 (55%)  |
| Antihypertensives                                                                  |          |           |
| Calcium Channel Blockers                                                           | 6 (26%)  | 14 (64%)  |
| ACE inhibitors                                                                     | 13 (57%) | 8 (36%)   |
| Other                                                                              | 9 (39%)  | 7 (32%)   |
| Statins                                                                            | 18 (78%) | 19 (86%)  |
| Anti-depressants                                                                   | 8 (35%)  | 5 (23%)   |
| Diabetes medication                                                                | 4 (17%)  | 4 (18%)   |

|                                       |             |             |
|---------------------------------------|-------------|-------------|
| Chronic pain medication               | 12 (52%)    | 8 (36%)     |
| Other                                 | 5 (22%)     | 3 (14%)     |
| <b>Employment Status, n (%)</b>       |             |             |
| Employed (and working)                | 2 (9%)      | 1 (5%)      |
| Retired                               | 18 (78%)    | 15 (68%)    |
| Semi-retired                          | 1 (4%)      | 0 (0%)      |
| Unemployed                            | 2 (9%)      | 5 (27%)     |
| <b>Pre-stroke Exercise History, n</b> |             |             |
| Exerciser (%)                         | 10 (43%)    | 8 (36%)     |
| <b>Mini Mental State Exam:</b>        |             |             |
| n,                                    | 22*,        | 22,         |
| Mean (SD)                             | 27.5 (2.54) | 27.9 (3.01) |
| Median                                | 28          | 29          |
| Range                                 | 19– 30**    | 19-30**     |

^ Participants may have more than one co-morbidity / medication.

\*1 participant with severe aphasia had difficulties completing the MMSE. The participant could understand and follow instructions and was considered cognitively able to participate in the trial.

\*\*Higher scores indicate better cognitive function. Participants range from no to moderate degree of cognitive impairment.

Blinding of outcome assessors was considered successful as only 2/41 (5%) participants revealed their allocations after completion of outcome measures, both were intervention participants. Different assessors were used for subsequent assessments therefore risk of bias was minimised.

### **Objective 2: Acquire retention rates and outcome variance**

Forty out of 45 (88%, 95% CI: 76% to 96%) completed 6-month and 9-month follow-ups. Despite fewer people being randomised than expected, high retention preserved the number of datasets needed to perform our sample size estimates (Table 2).

**Table 2 Sample estimates for potential candidate primary outcomes from ReTrain pilot RCT**

| Primary Outcome Measure                    | Sample Size Estimates <sup>a</sup> | Minimal Clinically Important Difference (MCID) | Observed SD range | Effect size (MCID/SD) |
|--------------------------------------------|------------------------------------|------------------------------------------------|-------------------|-----------------------|
| Rivermead Mobility Index                   | 36 – 44                            | 3.0 <sup>b</sup>                               | 2.33 – 2.66       | 1.13 – 1.29           |
| Timed Up and Go                            | 1,438 – 2,673                      | 1.2 – 3.4 <sup>c</sup>                         | 15.69 – 21.39     | 0.06 – 0.22           |
| Modified Patient Specific Functional Scale | 16 – 200                           | 1.0 – 3.0 <sup>c</sup>                         | 1.58 – 1.94       | 0.52 – 1.7            |

|                                      |            |               |                |                         |
|--------------------------------------|------------|---------------|----------------|-------------------------|
| Physical Activity<br>(Accelerometer) | 350 - 1458 | Not available | Not applicable | 0.2 – 0.45 <sup>d</sup> |
|--------------------------------------|------------|---------------|----------------|-------------------------|

<sup>a</sup>Figures represent overall (two group) sample size estimates required for a definitive trial. Sample sizes estimated for 1:1 allocation at 90% power and 5% alpha and assuming 20% attrition. Calculations are conservative showing range from best case scenario (largest MCID and smallest SD) to worst case scenario (smallest MCID and largest SD) of SDs observed in this trial and published MCIDs where available.

<sup>b</sup>MCID available from stroke research for the Rivermead Mobility Index ([http://www.stroking.ca/psycho/rmi\\_psycho/](http://www.stroking.ca/psycho/rmi_psycho/)).

<sup>c</sup>MCIDs identified from other disease groups used as proxies as no published stroke MCIDs<sup>42,43</sup>.

<sup>d</sup>There are no MCID data available for PA (accelerometry) in stroke (or any other cardio vascular disease) we therefore applied sample size calculations undertaken for a relevant ongoing HTA NIHR trial which estimated n= 562 (effect size 0.3) or n= 413 (effect size 0.35) (<http://www.isrctn.com/ISRCTN15644451>).

**Objective 3: Acceptability and feasibility for participants and to complete the Trainer manual**

Eleven themes from 20 qualitative interviews summarise participants' views, Table 3 provides illustrative quotes.



Table 3 Participant quotes from qualitative interviews

**Acceptability**

"It is ten weeks, you do it twice a week. Personally for the first say three or four weeks, I'd think well this is getting me nowhere, but then you think that you notice things, things are improving and at the end of ten weeks you want to go for twenty weeks (4:119-125)

"I'd tell them [another stroke survivor] to go ahead and do it and to take it step by step and not to worry about it. Because you are treated with great respect, it was wonderful and they were. I'll never be able to speak highly enough of them." (25:388-390)

**Intervention approach**

"It opened my eyes to what can be done you know. How can I put it? It wasn't as if I believed that I couldn't do something it was being pointed in the right direction...heh I can do it...Great you've done it, you did it and you do it again. Yeah it was great" (4:358-361). "It wasn't easy at first, but I used to manage it" (5:246)

"It was the way they addressed how you do your exercises. What it is doing to you and all the rest of it. Now to me that was absolutely important, because it made sense of why you are doing all this pumping up and down, and if you can't do that, do this." (22:252-255)

"It was you felt as if you were a human being with them. You know and you were treated with respect...and although you couldn't do things and you felt a bit of an idiot, they never let you feel like that" (25:567-572).

"It's a bit like playing scales...it's not creative but as I gradually realise it, it could potentially be creative...doing something that I had been doing without thinking before and now couldn't. ...Now and again I walk without my stick without realising it, that's creative I think." (6:354-392)

**Impact of programme - psychologically**

"I suppose it is attitude of mind as much as anything. I mean I felt I'd gone through that stage of training and that I was going to get better. It built my spirit up...I felt as if it, well it was worth the three months you know and at the end of the day I hope I'm going to get back to something like normal" (16:358-365)

"It really helped me mentally, you know I thought right I can do this because before I was going into my shell, thinking I can't do this and I can't do that. Oh I am not going out. Then I went on that [ReTrain] and it gave me an element of confidence." (43:562-565).

**Impact of programme – physically**

"you started to notice they are actually starting to fall into place. I don't remember doing that last time. But I am doing it now great get on with it I am doing it faster now" (4:189-190)

"I know if I went down which I did one day in the hall in the early stages of coming back home and I did manage to get up and walk upstairs...but I wouldn't have been able to do that had I not had that [training]" (16:475-477)

**Homework adherence**

"trainers were always on about doings exercises at home...I could never pin him down to how long that should be for though" (6; line 624).

**Programme technique adherence**

"I think that was the big thing you saw the benefits after the second, well the first or second session we had. 'Oh we can do

**a) Study Information**

Participants considered information received as adequate. Five noted that information was limited, but most were unconcerned. Two added that too much information may have been detrimental to recruitment. Four others were satisfied with the information they received.

**b) Outcome Measure Burden**

Participants found the assessment process acceptable. Fifteen indicated no burden. Three participants indicated that they needed help from their carers to complete questionnaires,

1  
2  
3 particularly recalling and reporting health resource use, placing a time burden on their  
4 carer.  
5  
6

7  
8 *c) Venue*

9 Half of the ReTrain participants were very positive about the training venues. Important  
10 features were: space, provision of fluids (water, tea), easy availability of parking. For some  
11 the travelling distance was a concern; two noted their venue (a gym) was very noisy,  
12 insufficiently heated and the session time was too early. Some noted the small amount of  
13 equipment as an advantage (it aided transfer of exercises to their home) whereas others felt  
14 the equipment was not sufficiently specialist.  
15  
16

17  
18 *d) Adherence to ReTrain (see also Objective 5)*

19 All ten ReTrain interviewees reported training in the five core (ARNI) techniques. Homework  
20 was discussed by all but lacked specificity, only two had clear homework examples that  
21 were effectively incorporated into their training. Although goal setting was a core element,  
22 only four specifically identified how their goals were linked into their overall programme.  
23 Three participants reported not attending drop-in sessions due to lack of information. Of  
24 three who attended two suggested the drop-ins repeated previous sessions.  
25  
26

27  
28 *e) Group dynamics*

29 Group working was positively regarded and seen as integral to programme effectiveness.  
30 There were exceptions, one participant did not find 'performing' in public a positive  
31 experience. Likewise some suggested that groups reduced training intensity relative to one-  
32 to-one training.  
33  
34

35  
36 *f) Co-morbidities*

37 Participants identified several co-morbidities e.g.: knee replacements, cancer, angina,  
38 diabetes, amputation and depression. These had potential to impact on both the training  
39 and research participation but for most any concerns were accommodated by trainers.  
40 However, in one case some uncomfortable discussions occurred before an appropriate  
41 balance of perceived capability and training challenges was reached. Three participants with  
42 visual deficits, dyslexia and dysgraphia mentioned difficulties completing the research  
43 documents.  
44  
45

46  
47 *g) Carer Health*

48 Two ReTrain participants commented on how commitment to the programme impacted on  
49 their partner's health: one stopped attending sessions because the time away resulted in  
50 excessive strain on his wife; another expressed similar concern but did not stop attending.  
51  
52

53  
54 *h) Trainer Manual*  
55  
56  
57  
58  
59  
60

1  
2  
3 We refined the Trainer Manual throughout the study. Issues raised during interviews guided  
4 revisions including greater emphasis and clarification about use of goal setting, drop-ins,  
5 homework diaries, and managing participants with co-morbidities.  
6

7  
8 **Objective 4:** *Assess outcome completion and burden*

9  
10 We collected baseline (n=41), 6-month (n=40) and 9-month (n=41) follow-up data on the  
11 majority of participants (Figure 2). Accelerometry wear time (24 hours for 7 days) was high,  
12 most having 6 or more valid days ( $\geq 16$ hrs per day, including  $\geq 1$  weekend day). Only two  
13 participants at baseline, one at 6-months and three at 9-months did not achieve 4 valid days  
14 of wear time. There was very little missing data. For three primary outcome measures there  
15 was only one participant with missing data at any given assessment time-point. For  
16 secondary outcomes there was either no missing data or only one to two participants with  
17 missing data at each time-point, apart from the exercise diary (between two and four  
18 participants with missing data at each time-point) and the Service Receipt Inventory  
19 (between three and seven participants with missing data). There were eight participants  
20 without accelerometer data at 9-month assessment owing to hardware (device) and  
21 software (data extraction method) malfunctions.  
22  
23  
24

25  
26 **Objective 5:** *Perform process evaluation with an assessment of intervention fidelity*

27  
28 We implemented a comprehensive video recording schedule (over 200 recordings) to  
29 capture participant and trainer adherence to key ARNI techniques. Both trainers and  
30 participants demonstrated high adherence. Modifications to techniques (to accommodate  
31 participant co-morbidities) were captured and informed Trainer Manual development.  
32

33  
34 We combined metrics from attendance registers and homework records to generate a  
35 'dose'/adherence score, categorising individuals into low (< 50%), medium (50% - 75%) and  
36 high (>75%) adherence categories. Of 23 ReTrain participants two did not receive the  
37 intervention (one returned to work; one withdrew from study), five had low adherence, five  
38 medium adherence, and eleven high adherence. These latter 16 (70%) were considered to  
39 have received sufficient 'dose' of ReTrain.  
40  
41

42  
43 Trainers varied in their completion of session checklists: pre-exercise and end-of-session  
44 components were less consistently reported compared to ARNI techniques but overall there  
45 was good adherence to programme delivery.  
46

47  
48 **Objective 6:** *Calculate the cost of intervention delivery and feasibility of collecting health and  
49 social service resource use.*

50  
51 ReTrain costs were generated for each cohort, accounting for different programme sizes  
52 (four or eight participants) and venues. Costs per participant ranged from £615 to £972. The  
53 total per participant cost for ReTrain (assuming 24 participants) was £777. We conducted  
54 medical notes review on 35/41 participants and compared this 'gold standard' with self-  
55 reported health resource use. Participants reported using fewer resources compared to case  
56  
57  
58  
59  
60

1  
2  
3  
4  
5  
6  
7  
8  
9  
10  
11  
12  
13  
14  
15  
16  
17  
18  
19  
20  
21  
22  
23  
24  
25  
26  
27  
28  
29  
30  
31  
32  
33  
34  
35  
36  
37  
38  
39  
40  
41  
42  
43  
44  
45  
46  
47  
48  
49  
50  
51  
52  
53  
54  
55  
56  
57  
58  
59  
60

notes review. Data from medical notes informed the cost-utility and effectiveness frameworks for use in a definitive trial.

**Descriptive analysis of participant outcomes**

Primary and secondary outcome data are summarised in Table 4a and 4b respectively.

For peer review only

**Table 4a: Number, means and standard deviations as a function of trial arm and measurement time point for candidate primary outcome measures in the ReTrain pilot trial**

| Measures: n, Mean (SD)                                                          | Data collection time point |                        |                        |                        |                        |                        |
|---------------------------------------------------------------------------------|----------------------------|------------------------|------------------------|------------------------|------------------------|------------------------|
|                                                                                 | Baseline                   |                        | 6 month <sup>^</sup>   |                        | 9 month <sup>^</sup>   |                        |
|                                                                                 | ReTrain (N=23)             | Control (N=22)         | ReTrain (N=21)         | Control (N=20)         | ReTrain (N=21)         | Control (N=20)         |
| Rivermead Mobility Index                                                        | 23,<br>11.41 (3.05)        | 22,<br>11.68 (2.23)    | 21,<br>12.14 (2.73)    | 19,<br>12.47 (1.87)    | 21,<br>12.24 (3.27)    | 20,<br>12.65 (1.81)    |
| Modified Patient Specific Functional Scale                                      | 22,<br>2.95 (1.85)         | 22,<br>2.55 (1.23)     | 21,<br>3.47 (2.12)     | 19,<br>3.56 (1.69)     | 21,<br>3.25 (2.03)     | 20,<br>3.74 (1.86)     |
| Timed Up and Go (secs) <sup>a</sup>                                             | 23,<br>27.57 (27.57)       | 21,<br>21.24 (11.18)   | 21,<br>20.76 (19.64)   | 19,<br>16.37 (9.69)    | 21,<br>20.76 (19.25)   | 20,<br>15.95 (12.00)   |
| Physical Activity: <b>Diary</b> *                                               | 21,<br>6.67 (19.20)        | 20,<br>10.69 (17.39)   | 21,<br>17.39 (24.28)   | 19,<br>25.60 (34.98)   | 19,<br>13.92 (22.25)   | 20,<br>35.11 (49.70)   |
| Physical Activity (Accelerometer):<br><b>Total PA minutes</b> * <sup>b</sup>    | 21,<br>145.10 (118.27)     | 20,<br>165.56 (139.09) | 19,<br>134.88 (129.77) | 18,<br>178.15 (155.07) | 16,<br>152.08 (118.52) | 17,<br>197.42 (144.31) |
| Physical Activity (Accelerometer):<br><b>Light PA minutes</b> * <sup>b</sup>    | 21,<br>92.78 (93.15)       | 20,<br>110.18 (115.65) | 19,<br>95.67 (105.50)  | 18,<br>121.80 (122.46) | 16,<br>99.33 (99.54)   | 17,<br>134.54 (126.36) |
| Physical Activity (Accelerometer):<br><b>MVPA PA minutes</b> * <sup>b</sup>     | 21,<br>52.32 (68.94)       | 20,<br>55.38 (39.66)   | 19,<br>39.21 (39.33)   | 18,<br>56.35 (51.26)   | 16,<br>52.75 (60.03)   | 17,<br>62.88 (41.73)   |
| Physical Activity (Accelerometer):<br><b>Moderate PA minutes</b> * <sup>b</sup> | 21,<br>50.53 (66.77)       | 20,<br>53.38 (37.04)   | 19,<br>37.73 (37.40)   | 18,<br>53.07 (43.99)   | 16,<br>51.11 (58.54)   | 17,<br>60.93 (40.84)   |
| Physical Activity (Accelerometer):<br><b>Vigorous PA minutes</b> * <sup>b</sup> | 21,<br>1.79 (3.85)         | 20,<br>2.00 (3.96)     | 19,<br>1.48 (2.39)     | 18,<br>3.28 (8.14)     | 16,<br>1.64 (2.38)     | 17,<br>1.94 (2.33)     |

Note: <sup>^</sup> post randomisation; \*Average minutes of physical activity per day; <sup>a</sup>Precision to 10 ms; <sup>b</sup>Measurement recorded 100 times a second (accelerometer set to a sampling frequency of 100 Hz).

**Table 4b: Number, means and standard deviations as a function of trial arm and measurement time point for candidate secondary outcome measures in the ReTrain pilot trial**

| Measures: n, Mean (SD)                                          | Data collection time point |                      |                      |                     |                      |                      |
|-----------------------------------------------------------------|----------------------------|----------------------|----------------------|---------------------|----------------------|----------------------|
|                                                                 | Baseline                   |                      | 6 month <sup>^</sup> |                     | 9 month <sup>^</sup> |                      |
|                                                                 | ReTrain (N=23)             | Control (N=22)       | ReTrain (N=21)       | Control (N=20)      | ReTrain (N=21)       | Control (N=20)       |
| Fatigue Assessment Scale                                        | 23,<br>27.17 (7.14)        | 22,<br>25.49 (7.44)  | 21,<br>24.05 (6.26)  | 19,<br>24.05 (8.86) | 20,<br>27.45 (5.95)  | 20,<br>25.83 (9.14)  |
| Stroke Self-efficacy Questionnaire                              | 22,<br>72.41 (22.00)       | 22,<br>73.46 (17.87) |                      |                     | 20,<br>73.73 (19.63) | 20,<br>74.40 (16.94) |
| Outcome expectations for exercise Scale (Exercise Beliefs)      | 23,<br>3.66 (0.70)         | 22,<br>3.78 (0.52)   |                      |                     | 19,<br>4.03 (0.59)   | 19,<br>3.73 (0.52)   |
| Short self-efficacy for Exercise Scale (Exercise self-efficacy) | 23,<br>3.26 (0.92)         | 22,<br>3.32 (0.89)   |                      |                     | 19,<br>3.32 (0.89)   | 18,<br>3.22 (1.06)   |
| Stroke Quality of Life Scale(Total)                             | 22,<br>3.31 (0.68)         | 22,<br>3.45 (0.69)   |                      |                     | 20,<br>3.38 (0.70)   | 20,<br>3.63 (0.82)   |
| EQ-5D-5L                                                        | 22,<br>0.51 (0.25)         | 20,<br>0.55 (0.24)   |                      |                     | 19,<br>0.52 (0.24)   | 20,<br>0.62 (0.25)   |
| SF-12: Physical Component                                       | 21,<br>33.12 (7.22)        | 20,<br>31.83 (6.69)  |                      |                     | 19,<br>33.74 (6.44)  | 19,<br>33.25 (6.91)  |
| SF-12: Mental Component                                         | 21,<br>50.10 (7.11)        | 20,<br>50.68 (7.98)  |                      |                     | 19,<br>50.47 (6.51)  | 19,<br>48.05 (8.45)  |
| Modified Caregiver Strain Index (Carer Burden)                  | 8,<br>11.39 (8.03)         | 10,<br>7.40 (7.83)   |                      |                     | 9,<br>9.89 (7.22)    | 6,<br>9.50 (8.92)    |

Note: <sup>^</sup> post randomisation; grey cells indicate measurement not taken at this time point

Table 4a and 4b report mean scores across, respectively, candidate primary and secondary outcome measures at each time point of the pilot trial. The trial was not powered to detect differences in outcome between trial arms or over time and so we do not interpret the patterns of means. However, the results clearly demonstrate that we were able to collect the necessary data and retained acceptable completion rates on all measures across all time points of the study. Attrition was lower than the 20% expected. For each outcome measure (except carer burden as not everyone had a carer) we achieved in excess of the 30 cases (i.e. 15 completed measurements per arm) recommended for pilot studies to estimate outcome variance.

### Safety

During assessment periods there was one serious but unrelated event in the intervention group (none in the control group) and slightly fewer overall adverse events in the intervention group (Table 5a).

**Table 5a: Adverse Events (AE) and Serious Adverse Events (SAE) reported during 6 and 9-month outcome assessment periods for both ReTrain and Control group**

|                | Event Type | Total Events     | Attribution |                  |                  |           | N People Reporting Event |
|----------------|------------|------------------|-------------|------------------|------------------|-----------|--------------------------|
|                |            |                  | Related     | Probably Related | Possible Related | Unrelated |                          |
| ReTrain (N=21) |            |                  |             |                  |                  |           |                          |
|                | <b>AE</b>  | 125 <sup>a</sup> | 6           | 5                | 73               | 41        | 19                       |
|                | <b>SAE</b> | 1 <sup>b</sup>   | 0           | 0                | 0                | 1         | 1                        |
| Control (N=20) | Event Type | Total Events     | Related     | Probably Related | Possible Related | Unrelated | N People Reporting Event |
|                | <b>AE</b>  | 150 <sup>c</sup> | 0           | 0                | 0                | 150       | 19                       |
|                | <b>SAE</b> | 0                | 0           | 0                | 0                | 0         | 0                        |

<sup>a</sup>: Muscle soreness (n=26); fatigue (n=58); falls (n=12); trips (n=10); other (n=19; including but not limited to: low mood, itchiness, colds, issues with eyesight, cystitis).

<sup>b</sup>: Ambulance conveyance to A&E due to reaction to antibiotics being taken for chest infection.

<sup>c</sup>: Muscle soreness (n=39); fatigue (n=50); falls (n=19); trips (n=12); other (n=30; including but not limited to: low mood, depression, dizzy spells, sore toes, poor memory, colds, poor sleep, loss of sense of smell, issues with eyesight).

**Table 5b: Adverse Events (AE) and Serious Adverse Events (SAE) reported during ReTrain programme**

|                | Event Type | Total Events   | Attribution |                  |                  |           | N People Reporting Event |
|----------------|------------|----------------|-------------|------------------|------------------|-----------|--------------------------|
|                |            |                | Related     | Probably Related | Possible Related | Unrelated |                          |
| ReTrain (N=21) |            |                |             |                  |                  |           |                          |
|                | <b>AE</b>  | 2 <sup>a</sup> | 7           | 0                | 12               | 3         | 11                       |
|                | <b>SAE</b> | 6 <sup>b</sup> | 0           | 1                | 1                | 4         | 5                        |

<sup>a</sup>: Muscle soreness (n=0); fatigue (n=2); falls (n=10); trips (n=1); other (n=9; including but not limited to: fainting; twisted or swollen ankle, suspected TIA (non-confirmed)).

<sup>b</sup>: Urine retention (n=3); black-out/fainted (n=1); renal & heart failure (n=1); TIA (n=1).

For ReTrain only (Table 5b) there were six serious adverse events during the intervention period: four were unrelated, one possibly related (fainted) and one probably related (TIA) to the intervention. Of the 22 adverse events reported, three of them occurred at the venue (1 x fall; 1 x trip; 1 x ankle strain).

## Discussion

The ReTrain pilot trial met all its pre-stated feasibility objectives: the intervention, trial design and research processes were acceptable to participants as well as feasible and safe to deliver; we demonstrated feasibility of recruitment (recruiting above our target of 48), and retention (less than 20% attrition). At the point of randomisation we were slightly under target (45/48). However due to high retention we preserved the number of datasets required (30) to calculate sample size estimates. Furthermore, participants were not unduly burdened by study requirements and there were high completion rates for most outcome measures. We also successfully rehearsed procedures for process and health economic evaluations as well as trial governance processes (trial management and independent trial steering meetings) and maintained our strong Patient and Public Involvement. Participant interviews, outcome measurement results and fidelity assessments highlighted refinements that we have already, or can, put in place for a future definitive RCT of ReTrain. For example, we have some new insights into how to enhance delivery by trainers and engagement by participants (e.g. by placing more focus on individually tailored goal setting; stressing goal and homework reviews; better explanation and promotion of the drop-in sessions). These are all relatively small amendments that are likely to enhance the impact of the training programme. Our trial compares favourably with another feasibility RCT assessing the delivery of the Bridges stroke self-management programme<sup>44</sup> which had relatively low recruitment, questions regarding programme delivery in addition to usual



1  
2  
3 rehabilitation, and recommendations for further assessment of intervention fidelity. Some  
4 of their findings were similar to ReTrain: participants were broadly positive about their  
5 programme; health professionals found it acceptable to use and researchers noted the lack  
6 of outcome measure sensitivity for detecting change<sup>44</sup>.  
7  
8

### 9 **Limitations and lessons for planning design of a future trial**

10  
11 When planning this study we selected our candidate primary outcome measures on the  
12 basis that they were likely to measure improvements that could be attributed to our  
13 intervention; our pilot work was therefore to determine acceptability and feasibility  
14 (including their psychometric utility) of these measures. However we were not able to  
15 identify a clear candidate primary outcome for a definitive RCT from this pilot work. It is  
16 possible that an 'activities of daily living' measure (as typically used in rehabilitation studies)  
17 may be more useful in a future definitive trial. Identifying robust outcome measures in  
18 rehabilitation trials is a common problem<sup>45</sup> compounded by variability in stroke related  
19 disability and participants' comorbidities. This pilot trial was not designed (statistically  
20 powered) to test for differences between treatment arms, so no inferential analyses were  
21 performed. Any perceived trend (or absence of a trend) should not be interpreted as an  
22 indication of an effect (or its absence) and outcomes should not be selected based upon any  
23 assumed trend. Acceptability outcomes coupled with a pragmatic and efficient (cost-  
24 effective) trial design better inform choice of outcome. From our sample the Timed Up and  
25 Go task would be unsuitable due to potentially large sample size requirements (~2000  
26 participants) and the baseline high levels of mobility meant the Rivermead Mobility Index  
27 demonstrated a ceiling effect, so could only be used if we altered inclusion criteria. Physical  
28 activity was measured robustly via accelerometry and may be the best candidate. We had  
29 some software and hardware malfunctions but important lessons have been learned to  
30 mitigate these problems in future. Capture of frequency and intensity of activity would  
31 allow comparison with stroke guidelines. Although there is a cost implication, accelerometry  
32 provides a more objective measurement of daily activity and may also be an adequate proxy  
33 of functional mobility, however we will also investigate the benefits of using other PA  
34 measures such as questionnaires (instead of our diaries) or using multiple measures such as  
35 accelerometry and heart rate monitors whilst being aware of problems with compliance and  
36 participant burden<sup>46</sup>.  
37  
38  
39  
40  
41  
42  
43  
44  
45  
46

47 Further limitations relate to the lack of validation of our adherence measure and the local  
48 demographics: our sample did not have a wide age range or ethnic diversity. Whilst we did  
49 demonstrate delivery in different locations in the South West our plans for a larger  
50 definitive trial would include a wider demographic from more centres across the UK.  
51  
52

53 For a future trial we plan to implement more readable, higher quality written (and pictorial)  
54 information and questionnaires although the amount of information provided was  
55 appropriate. We will mitigate recruitment loss prior to randomisation by establishing  
56 expression of interest and eligibility to take part but delaying taking consent until we are  
57  
58  
59  
60

1  
2  
3 confident of sufficient numbers to create a cohort for randomisation; this has resource  
4 implications that will need to be built into future funding. We will run ReTrain in community  
5 centres or halls as these were more acceptable and much cheaper than gyms; we will  
6 provide a more detailed ReTrain induction to ensure trainers understand and communicate  
7 all components of the programme. For the QALY comparisons recent policy changes mean  
8 the conversion from SF-12 to SF-6D has been phased out, and so less justification for using  
9 the SF-12 in a future study. Instead we will consider using the Stroke Impact Scale (SIS) as  
10 this is a valid health-related QoL measure. This may also be a better candidate self-report  
11 primary outcome measure for a definitive trial as it has shown sensitivity in long-term stroke  
12 survivors who have mild to moderate stroke<sup>47</sup>. The SIS assesses multiple facets of physical  
13 and emotional issues and so would align with perceived physical and psychological benefits  
14 participants attribute to ReTrain. Our sample size estimates for candidate objective primary  
15 outcomes (Table 2) indicate we will need a moderately sized trial (n=562, effect size 0.3 or  
16 n=413, effect size 0.35) for PA assessed by accelerometry or a smaller trial (n=96) if we use  
17 the physical component domain of the SIS (based on 80% power, 5% alpha and assuming  
18 20% attrition<sup>48</sup>). We have established appropriate process evaluation methods to capture  
19 multiple facets of intervention fidelity.  
20  
21

### 22 23 24 25 26 27 **Generalisability**

28  
29 This pilot study was not designed to demonstrate generalisability however our participant  
30 population represent the sub-set of community-dwelling stroke survivors who have some  
31 independent mobility but remain with stroke-related disability that affects their QoL. Our  
32 participants also represent the growing proportion of people who have more than one long-  
33 term condition. ReTrain techniques target the effects of stroke but can accommodate other  
34 conditions which trainers take into account when preparing the participant's individually  
35 tailored programme. Some of the key ReTrain (ARNI based) techniques are designed for  
36 people with unilateral impairment, such as hemiparesis; however one of our participant's  
37 main unilateral impairment was due to diabetes related lower limb amputation, illustrating  
38 how ReTrain can accommodate people with multiple co-morbidities.  
39  
40  
41  
42

### 43 44 45 46 47 48 49 50 51 52 53 54 55 56 57 58 59 60 **Conclusion**

Our pilot trial has demonstrated that ReTrain is feasible, acceptable, and safe. We met our  
recruitment and retention targets and demonstrated our ability to run our intervention in  
different locations. Participants were not unduly burdened by study requirements and most  
outcome measures had high levels of completion. We successfully tested procedures for  
process and health economic evaluations. Participant interviews, outcome measurement  
results and fidelity assessments highlighted some issues needing refinement prior to a  
future definitive RCT of ReTrain. Many of these have already been addressed and we intend  
to seek funding for a definitive trial.

## Other information

**Protocol** Version: 5 Date: 20/04/2016. Published version available here:

<http://bmjopen.bmj.com/content/6/10/e012375.full>

## Acknowledgements

We thank our funders, the Stroke Association and the Peninsula Patient Involvement Group with the ReTrain Stroke Service User Group for their help. The National Institute for Health Research (NIHR) Collaboration for Leadership in Applied Health Research and Care South West Peninsula at the Royal Devon and Exeter NHS Foundation Trust also supported this work but views expressed are those of the author(s) and not necessarily those of the NHS, the NIHR or the Department of Health. We also thank our Trial Steering Committee: Ailie Turton (University of the West of England) Siobhan Creanor (Plymouth University), Debbie Neal (Bournemouth University), Justin Smallwood (Patient and Public representative), and Gail Seymour (University of Exeter - Sponsor).

Ethical review by NRES Committee South West – Cornwall & Plymouth (REC ref: 15/SW/04).

## Author's Contributions

SGD led the team and drafted this article, RC prepared protocol, ethical submission and amendments, managed the project, contributed to analysis; LP drafted protocol prior to funding application, conducted interviews, contributed to analysis, AF, MJ, RA, MN, SGD & LP provided stroke rehabilitation expertise; RST provided statistical and trial methodological expertise, led analysis; MN provided qualitative expertise and analysed qualitative data; AIS led accelerometry work, supported by RP who provided accelerometry analysis; SGD & LP provided process evaluation expertise, SGD led the process evaluation and supervised LH; LH led video analysis work; AS provided health economic expertise and led economic work supported by PL; SS provided patient and public involvement expertise. All authors commented on the manuscript.

**Data sharing statement:** Participants did not consent for datasets to be stored or accessed outside of the research team. Therefore no datasets have been made publicly available.

**Competing Interests:** We declare funding from the Stroke Association.

## References

1. Feigin VL, Barker-Collo S, McNaughton H, et al. Long-term neuropsychological and functional outcomes in stroke survivors: current evidence and perspectives for new research. *Int J Stroke* 2008;3(1):33-40.
2. Townsend N, Wickramasinghe K, Bhatnagar P, et al. Coronary heart disease statistics: 2012 edition. London: British Heart Foundation, 2012.
3. Teasell R, Mehta S, Pereira S, et al. Time to rethink long-term rehabilitation management of stroke patients. *Top Stroke Rehabil* 2012;19(6):457-62.
4. McKeivitt C, Fudge N, Redfern J, et al. Self-reported long-term needs after stroke. *Stroke* 2011;42(5):1398-403.
5. Intercollegiate Stroke Working Party. National Clinical Guideline for Stroke, Fifth Edition. 5 ed. London: *Royal College of Physicians* 2016.
6. Rand D, Eng JJ, Tang PF, et al. How active are people with stroke?: use of accelerometers to assess physical activity. *Stroke* 2009;40(1):163-8.
7. Stroke Association. Stroke Statistics. London: Stroke Association, 2013.
8. Best C, van Wijck F, Dennis J, et al. A survey of community exercise programmes for stroke survivors in Scotland. *Health Soc Care Community* 2012;20(4):400-11.
9. NHS Stroke Improvement Programme. Life after stroke: Participating in community exercise and fitness 2012 [Available from: <http://www.improvement.nhs.uk/stroke/CommunityStrokeResource/CSRLifeafterstroke/CSRLifeafterstrokeexercisepoststroke/tabid/226/Default.aspx> accessed July 2012.
10. Harrington R, Taylor G, Hollinghurst S, et al. A community-based exercise and education scheme for stroke survivors: a randomized controlled trial and economic evaluation. *Clin Rehabil* 2010;24(1):3-15.
11. French B, Thomas LH, Leathley MJ, et al. Repetitive task training for improving functional ability after stroke. *Cochrane Database Syst Rev* 2007(4):Cd006073.
12. Lennon S, McKenna S, Jones F. Self-management programmes for people post stroke: a systematic review. *Clin Rehabil* 2013;27(10):867-78.
13. Brazzelli M, Saunders David H, Greig Carolyn A, et al. Physical fitness training for stroke patients. *Cochrane Database Syst Rev* 2011; (11). <http://www.mrw.interscience.wiley.com/cochrane/clsystrev/articles/CD003316/frame.html>.
14. Balchin T. The Successful Stroke Survivor: A new guide to functional recovery from stroke. Lingfield, UK: ARNI Trust 2011.
15. Poltawski L. Survey of Group ARNI classes in England, 2011, unpublished report.
16. Craig P, Dieppe P, Macintyre S, et al. Developing and evaluating complex interventions: the new Medical Research Council guidance. *BMJ* 2008;337:a1655.
17. Poltawski L, Abraham C, Forster A, et al. Synthesising practice guidelines for the development of community-based exercise programmes after stroke. *Implement Sci* 2013;8:115.
18. Kilbride C, Norris M, Theis N, et al. Action for Rehabilitation from Neurological Injury (ARNI): A pragmatic study of functional training for stroke survivors. *Open J Ther Rehabil* 2013;1:40-51.
19. Poltawski L, Briggs J, Forster A, et al. Informing the design of a randomised controlled trial of an exercise-based programme for long term stroke survivors: lessons from a before-and-after case series study. *BMC Res Notes* 2013;6:324.

20. Norris M, Kilbride C, Mohagheghi A, et al. A Qualitative Exploration of Participation in an Exercise Instructor Led Functional Training Programme for Community Dwelling Stroke Survivors. *Int J Ther Rehabil* 2013;20(12):597-605.
21. Eldridge SM, Chan CL, Campbell MJ, et al. CONSORT 2010 statement: extension to randomised pilot and feasibility trials. *BMJ* 2016;355.
22. Dean SG, Poltawski L, Forster A, et al. Community-based Rehabilitation Training after stroke: protocol of a pilot randomised controlled trial (ReTrain). *BMJ Open* 2016;6(10).
23. Stroke Association. Exercise and stroke London2013 [Available from: [https://www.stroke.org.uk/sites/default/files/exercise\\_and\\_stroke.pdf](https://www.stroke.org.uk/sites/default/files/exercise_and_stroke.pdf) accessed 24 05 2017 2017].
24. ACSM. American College of Sports Medicine Guidelines for Exercise Testing and Prescription. Philadelphia: American College of Sports Medicine, 2005.
25. Carnes D, Mullinger B, Underwood M. Defining adverse events in manual therapies: A modified Delphi consensus study. *Man Ther* 2010;15(1);2-6.
26. Green J, Forster A, Young J. A test-retest reliability study of the Barthel Index, the Rivermead Mobility Index, the Nottingham Extended Activities of Daily Living Scale and the Frenchay Activities Index in stroke patients. *Disabil Rehabil* 2001;23(15):670-6.
27. Hsieh CL, Hsueh IP, Mao HF. Validity and responsiveness of the rivermead mobility index in stroke patients. *Scand J Rehabil Med* 2000;32(3):140-2.
28. Ng SS, Hui-Chan CW. The timed up & go test: its reliability and association with lower-limb impairments and locomotor capacities in people with chronic stroke. *Arch Phys Med Rehabil* 2005;86(8):1641-7.
29. Stratford P, Gill C, Westaway M, et al. Assessing Disability and Change on Individual Patients: A Report of a Patient Specific Measure. *Physiother Can* 1995;47(4):258-63.
30. Jones F, Partridge C, Reid F. The Stroke Self-Efficacy Questionnaire: measuring individual confidence in functional performance after stroke. *J Clin Nurs* 2008;17(7b):244-52.
31. Michielsen HJ, De Vries J, Van Heck GL. Psychometric qualities of a brief self-rated fatigue measure: The Fatigue Assessment Scale. *J Psychosom Res* 2003;54(4):345-52.
32. Mead G, Lynch J, Greig C, et al. Evaluation of fatigue scales in stroke patients. *Stroke* 2007;38(7):2090-5.
33. Shaughnessy M, Resnick BM, Macko RF. Reliability and validity testing of the short self-efficacy and outcome expectation for exercise scales in stroke survivors. *J Stroke Cerebrovasc Dis* 2004;13(5):214-9.
34. Bohannon RW, Maljanian R, Lee N, et al. Measurement properties of the short form (SF)-12 applied to patients with stroke. *Int J Rehabil Res* 2004;27(2):151-4.
35. Herdman M, Gudex C, Lloyd A, et al. Development and preliminary testing of the new five-level version of EQ-5D (EQ-5D-5L). *Qual Life Res* 2011;20(10):1727-36.
36. Williams LS, Weinberger M, Harris LE, et al. Development of a stroke-specific quality of life scale. *Stroke* 1999;30(7):1362-9.
37. Thornton M, Travis SS. Analysis of the reliability of the modified caregiver strain index. *J Gerontol B, Psychol Sci Soc Sci* 2003;58(2):S127-32.
38. Craig LE, Wu O, Bernhardt J, et al. Approaches to economic evaluations of stroke rehabilitation. *Int J Stroke* 2014;9(1):88-100.
39. Browne RH. On the use of a pilot sample for sample size determination. *Stat Med* 1995;14(17):1933-4.

- 1  
2  
3 40. Bruno A, Akinwuntan AE, Lin C, et al. Simplified Modified Rankin Scale Questionnaire:  
4 Reproducibility Over the Telephone and Validation With Quality of Life. *Stroke* 2011;  
5 42(8)2276-9.  
6  
7 41. Hislop J, Adewuyi TE, Vale LD, et al. Methods for specifying the target difference in a  
8 randomised controlled trial: the Difference ELicitation in TriAls (DELTA) systematic  
9 review. *PLoS Med* 2014;11(5):e1001645.  
10  
11 42. Gautschi OP, Stienen MN, Corniola et al. Assessment of the Minimum Clinically  
12 Important Difference in the Timed Up and Go Test After Surgery for Lumbar Degenerative  
13 Disc Disease. *Neurosurgery* 2017; 80 (3):380-385.  
14  
15 43. Horn KK, Jennings S, Richardson G, et al. The patient-specific functional scale:  
16 psychometrics, clinimetrics, and application as a clinical outcome measure. *J Orthop*  
17 *Sports Phys Ther* 2012; 42 (1):30-42.  
18  
19 44. McKenna S, Jones F, Glenfield P, et al. Bridges self-management program for people with  
20 stroke in the community: A feasibility randomized controlled trial. *Int J Stroke*  
21 2015;10(5):697-704.  
22  
23 45. Wade DT. Outcome measures for clinical rehabilitation trials: impairment, function,  
24 quality of life, or value? *Am J Phys Med Rehabil* 2003;82(10 Suppl):S26-31.  
25  
26 48. Mansfield A, Knorr S, Poon V, et al. Promoting Optimal Physical Exercise for Life: An  
27 Exercise and Self-Management Program to Encourage Participation in Physical Activity  
28 after Discharge from Stroke Rehabilitation – A Feasibility Study. *Stroke Research and*  
29 *Treatment* 2016; [Available from <http://dx.doi.org/10.1155/2016/9476541>].  
30  
31 47. Rehabilitation Institute of Chicago. Rehabilitation Measures Database - Stroke Impact  
32 Scale [Available from:  
33 <http://www.rehabmeasures.org/Lists/RehabMeasures/DispForm.aspx?ID=934> accessed  
34 21 06 2017].  
35  
36 48. Saywell N, Vandal AC, Brown P, et al. Telerehabilitation to improve outcomes for people  
37 with stroke: study protocol for a randomised controlled trial. *Trials* 2012;13(1):233.  
38  
39  
40  
41  
42  
43  
44  
45  
46  
47  
48  
49  
50  
51  
52  
53  
54  
55  
56  
57  
58  
59  
60

Figure 1 – Recruitment and randomisation by cohort

For peer review only

1  
2  
3  
4  
5  
6  
7  
8  
9  
10  
11  
12  
13  
14  
15  
16  
17  
18  
19  
20  
21  
22  
23  
24  
25  
26  
27  
28  
29  
30  
31  
32  
33  
34  
35  
36  
37  
38  
39  
40  
41  
42  
43  
44  
45  
46  
47  
48  
49  
50  
51  
52  
53  
54  
55  
56  
57  
58  
59  
60

1  
2  
3  
4  
5  
6  
7  
8  
9  
10  
11  
12  
13  
14  
15  
16  
17  
18  
19  
20  
21  
22  
23  
24  
25  
26  
27  
28  
29  
30  
31  
32  
33  
34  
35  
36  
37  
38  
39  
40  
41  
42  
43  
44  
45  
46  
47  
48  
49  
50  
51  
52  
53  
54  
55  
56  
57  
58  
59  
60

Figure 2 – Participant flow through the trial

For peer review only



1  
2  
3  
4  
5  
6  
7  
8  
9  
10  
11  
12  
13  
14  
15  
16  
17  
18  
19  
20  
21  
22  
23  
24  
25  
26  
27  
28  
29  
30  
31  
32  
33  
34  
35  
36  
37  
38  
39  
40  
41  
42  
43  
44  
45  
46  
47  
48  
49  
50  
51  
52  
53  
54  
55  
56  
57  
58  
59  
60

Figure 1 – Recruitment and randomisation by cohort

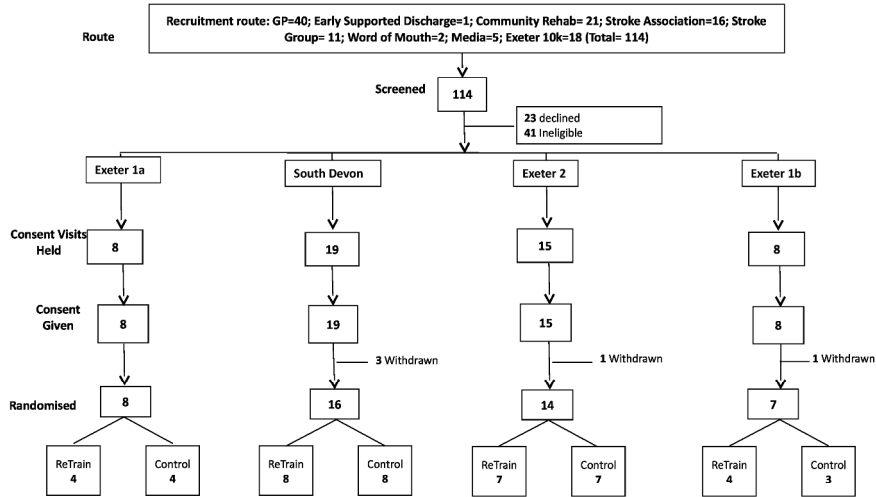

Figure 1 – Recruitment and randomisation by cohort

297x209mm (300 x 300 DPI)

ew only

1  
2  
3  
4  
5  
6  
7  
8  
9  
10  
11  
12  
13  
14  
15  
16  
17  
18  
19  
20  
21  
22  
23  
24  
25  
26  
27  
28  
29  
30  
31  
32  
33  
34  
35  
36  
37  
38  
39  
40  
41  
42  
43  
44  
45  
46  
47  
48  
49  
50  
51  
52  
53  
54  
55  
56  
57  
58  
59  
60

Figure 2 – Participant flow through the trial

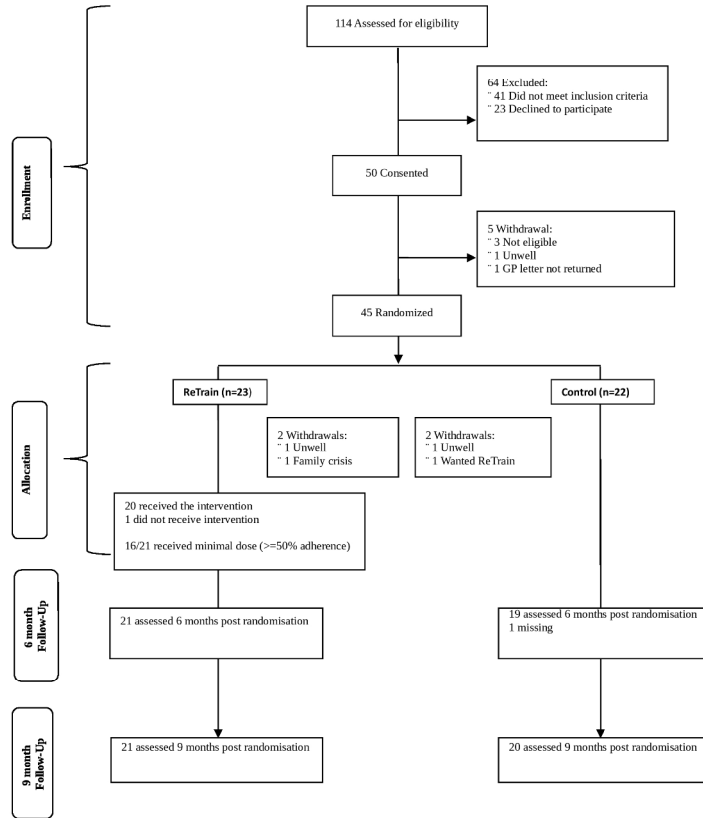

Figure 2 – Participant flow through the trial

209x297mm (300 x 300 DPI)

RESEARCH METHODS AND REPORTING

Table 2 | CONSORT checklist of information to include when reporting a pilot trial

| Section/topic and Item No         | Standard checklist item                                                                                                                                                                     | Extension for pilot trials                                                                                                                                   | Page No where item is reported |
|-----------------------------------|---------------------------------------------------------------------------------------------------------------------------------------------------------------------------------------------|--------------------------------------------------------------------------------------------------------------------------------------------------------------|--------------------------------|
| <b>Title and abstract</b>         |                                                                                                                                                                                             |                                                                                                                                                              |                                |
| 1a                                | Identification as a randomised trial in the title                                                                                                                                           | Identification as a pilot or feasibility randomised trial in the title                                                                                       | 1                              |
| 1b                                | Structured summary of trial design, methods, results, and conclusions (for specific guidance see CONSORT for abstracts)                                                                     | Structured summary of pilot trial design, methods, results, and conclusions (for specific guidance see CONSORT abstract extension for pilot trials)          | 2                              |
| <b>Introduction</b>               |                                                                                                                                                                                             |                                                                                                                                                              |                                |
| Background and objectives:        |                                                                                                                                                                                             |                                                                                                                                                              |                                |
| 2a                                | Scientific background and explanation of rationale                                                                                                                                          | Scientific background and explanation of rationale for future definitive trial, and reasons for randomised pilot trial                                       | 4                              |
| 2b                                | Specific objectives or hypotheses                                                                                                                                                           | Specific objectives or research questions for pilot trial                                                                                                    | 4-5                            |
| <b>Methods</b>                    |                                                                                                                                                                                             |                                                                                                                                                              |                                |
| Trial design:                     |                                                                                                                                                                                             |                                                                                                                                                              |                                |
| 3a                                | Description of trial design (such as parallel, factorial) including allocation ratio                                                                                                        | Description of pilot trial design (such as parallel, factorial) including allocation ratio                                                                   | 5                              |
| 3b                                | Important changes to methods after trial commencement (such as eligibility criteria), with reasons                                                                                          | Important changes to methods after pilot trial commencement (such as eligibility criteria), with reasons                                                     | N/A                            |
| Participants:                     |                                                                                                                                                                                             |                                                                                                                                                              |                                |
| 4a                                | Eligibility criteria for participants                                                                                                                                                       |                                                                                                                                                              | 5                              |
| 4b                                | Settings and locations where the data were collected                                                                                                                                        |                                                                                                                                                              | 5-6                            |
| 4c                                |                                                                                                                                                                                             | How participants were identified and consented                                                                                                               | 5                              |
| Interventions:                    |                                                                                                                                                                                             |                                                                                                                                                              |                                |
| 5                                 | The interventions for each group with sufficient details to allow replication, including how and when they were actually administered                                                       |                                                                                                                                                              | 5-6                            |
| Outcomes:                         |                                                                                                                                                                                             |                                                                                                                                                              |                                |
| 6a                                | Completely defined prespecified primary and secondary outcome measures, including how and when they were assessed                                                                           | Completely defined prespecified assessments or measurements to address each pilot trial objective specified in 2b, including how and when they were assessed | 6                              |
| 6b                                | Any changes to trial outcomes after the trial commenced, with reasons                                                                                                                       | Any changes to pilot trial assessments or measurements after the pilot trial commenced, with reasons                                                         | N/A                            |
| 6c                                |                                                                                                                                                                                             | If applicable, prespecified criteria used to judge whether, or how, to proceed with future definitive trial                                                  | N/A                            |
| Sample size:                      |                                                                                                                                                                                             |                                                                                                                                                              |                                |
| 7a                                | How sample size was determined                                                                                                                                                              | Rationale for numbers in the pilot trial                                                                                                                     | 6-7                            |
| 7b                                | When applicable, explanation of any interim analyses and stopping guidelines                                                                                                                |                                                                                                                                                              | N/A                            |
| Randomisation:                    |                                                                                                                                                                                             |                                                                                                                                                              |                                |
| Sequence generation:              |                                                                                                                                                                                             |                                                                                                                                                              |                                |
| 8a                                | Method used to generate the random allocation sequence                                                                                                                                      |                                                                                                                                                              | 7                              |
| 8b                                | Type of randomisation; details of any restriction (such as blocking and block size)                                                                                                         | Type of randomisation(s); details of any restriction (such as blocking and block size)                                                                       | 7                              |
| Allocation concealment mechanism: |                                                                                                                                                                                             |                                                                                                                                                              |                                |
| 9                                 | Mechanism used to implement the random allocation sequence (such as sequentially numbered containers), describing any steps taken to conceal the sequence until interventions were assigned |                                                                                                                                                              | 7                              |
| Implementation:                   |                                                                                                                                                                                             |                                                                                                                                                              |                                |
| 10                                | Who generated the random allocation sequence, enrolled participants, and assigned participants to interventions                                                                             |                                                                                                                                                              | 7                              |
| Blinding:                         |                                                                                                                                                                                             |                                                                                                                                                              |                                |
| 11a                               | If done, who was blinded after assignment to interventions (eg, participants, care providers, those assessing outcomes) and how                                                             |                                                                                                                                                              | 7                              |
| 11b                               | If relevant, description of the similarity of interventions                                                                                                                                 |                                                                                                                                                              | N/A                            |
| Analytical methods:               |                                                                                                                                                                                             |                                                                                                                                                              |                                |
| 12a                               | Statistical methods used to compare groups for primary and secondary outcomes                                                                                                               | Methods used to address each pilot trial objective whether qualitative or quantitative                                                                       | 7                              |
| 12b                               | Methods for additional analyses, such as subgroup analyses and adjusted analyses                                                                                                            | Not applicable                                                                                                                                               | N/A                            |

## RESEARCH METHODS AND REPORTING

Table 2 | CONSORT checklist of information to include when reporting a pilot trial

| Section/topic and Item No                             | Standard checklist item                                                                                                                           | Extension for pilot trials                                                                                                                                                            | Page No where item is reported |
|-------------------------------------------------------|---------------------------------------------------------------------------------------------------------------------------------------------------|---------------------------------------------------------------------------------------------------------------------------------------------------------------------------------------|--------------------------------|
| <b>Results</b>                                        |                                                                                                                                                   |                                                                                                                                                                                       |                                |
| Participant flow (a diagram is strongly recommended): |                                                                                                                                                   |                                                                                                                                                                                       |                                |
| 13a                                                   | For each group, the numbers of participants who were randomly assigned, received intended treatment, and were analysed for the primary outcome    | For each group, the numbers of participants who were approached and/or assessed for eligibility, randomly assigned, received intended treatment, and were assessed for each objective | Figure 1a & 1b<br>p. 8         |
| 13b                                                   | For each group, losses and exclusions after randomisation, together with reasons                                                                  |                                                                                                                                                                                       | Figure 1a & 1b<br>p. 10        |
| Recruitment:                                          |                                                                                                                                                   |                                                                                                                                                                                       |                                |
| 14a                                                   | Dates defining the periods of recruitment and follow-up                                                                                           |                                                                                                                                                                                       | 8                              |
| 14b                                                   | Why the trial ended or was stopped                                                                                                                | Why the pilot trial ended or was stopped                                                                                                                                              | N/A                            |
| Baseline data:                                        |                                                                                                                                                   |                                                                                                                                                                                       |                                |
| 15                                                    | A table showing baseline demographic and clinical characteristics for each group                                                                  |                                                                                                                                                                                       | 8-10                           |
| Numbers analysed:                                     |                                                                                                                                                   |                                                                                                                                                                                       |                                |
| 16                                                    | For each group, number of participants (denominator) included in each analysis and whether the analysis was by original assigned groups           | For each objective, number of participants (denominator) included in each analysis. If relevant, these numbers should be by randomised group                                          | Figure 1b                      |
| Outcomes and estimation:                              |                                                                                                                                                   |                                                                                                                                                                                       |                                |
| 17a                                                   | For each primary and secondary outcome, results for each group, and the estimated effect size and its precision (such as 95% confidence interval) | For each objective, results including expressions of uncertainty (such as 95% confidence interval) for any estimates. If relevant, these results should be by randomised group        | N/A                            |
| 17b                                                   | For binary outcomes, presentation of both absolute and relative effect sizes is recommended                                                       | Not applicable                                                                                                                                                                        | N/A                            |
| Ancillary analyses:                                   |                                                                                                                                                   |                                                                                                                                                                                       |                                |
| 18                                                    | Results of any other analyses performed, including subgroup analyses and adjusted analyses, distinguishing prespecified from exploratory          | Results of any other analyses performed that could be used to inform the future definitive trial                                                                                      | 10-15                          |
| Harms:                                                |                                                                                                                                                   |                                                                                                                                                                                       |                                |
| 19                                                    | All important harms or unintended effects in each group (for specific guidance see CONSORT for harms)                                             |                                                                                                                                                                                       | 16                             |
| 19a                                                   |                                                                                                                                                   | If relevant, other important unintended consequences                                                                                                                                  | N/A                            |
| <b>Discussion</b>                                     |                                                                                                                                                   |                                                                                                                                                                                       |                                |
| Limitations:                                          |                                                                                                                                                   |                                                                                                                                                                                       |                                |
| 20                                                    | Trial limitations, addressing sources of potential bias, imprecision, and, if relevant, multiplicity of analyses                                  | Pilot trial limitations, addressing sources of potential bias and remaining uncertainty about feasibility                                                                             | 17-18                          |
| Generalisability:                                     |                                                                                                                                                   |                                                                                                                                                                                       |                                |
| 21                                                    | Generalisability (external validity, applicability) of the trial findings                                                                         | Generalisability (applicability) of pilot trial methods and findings to future definitive trial and other studies                                                                     | 18                             |
| Interpretation:                                       |                                                                                                                                                   |                                                                                                                                                                                       |                                |
| 22                                                    | Interpretation consistent with results, balancing benefits and harms, and considering other relevant evidence                                     | Interpretation consistent with pilot trial objectives and findings, balancing potential benefits and harms, and considering other relevant evidence                                   | 18-19                          |
| 22a                                                   |                                                                                                                                                   | Implications for progression from pilot to future definitive trial, including any proposed amendments                                                                                 | 19                             |
| <b>Other information</b>                              |                                                                                                                                                   |                                                                                                                                                                                       |                                |
| Registration:                                         |                                                                                                                                                   |                                                                                                                                                                                       |                                |
| 23                                                    | Registration number and name of trial registry                                                                                                    | Registration number for pilot trial and name of trial registry                                                                                                                        | 2, 19                          |
| Protocol:                                             |                                                                                                                                                   |                                                                                                                                                                                       |                                |
| 24                                                    | Where the full trial protocol can be accessed, if available                                                                                       | Where the pilot trial protocol can be accessed, if available                                                                                                                          | 19                             |
| Funding:                                              |                                                                                                                                                   |                                                                                                                                                                                       |                                |
| 25                                                    | Sources of funding and other support (such as supply of drugs), role of funders                                                                   |                                                                                                                                                                                       | 2, 19                          |
| 26                                                    |                                                                                                                                                   | Ethical approval or approval by research review committee, confirmed with reference number                                                                                            | 19                             |

# BMJ Open

## Community-based Rehabilitation Training after stroke: Results of a pilot randomised controlled trial (ReTrain) investigating acceptability and feasibility

|                                 |                                                                                                                                                                                                                                                                                                                                                                                                                                                                                                                                                                                                                                                                                                                                                                                                                              |
|---------------------------------|------------------------------------------------------------------------------------------------------------------------------------------------------------------------------------------------------------------------------------------------------------------------------------------------------------------------------------------------------------------------------------------------------------------------------------------------------------------------------------------------------------------------------------------------------------------------------------------------------------------------------------------------------------------------------------------------------------------------------------------------------------------------------------------------------------------------------|
| Journal:                        | <i>BMJ Open</i>                                                                                                                                                                                                                                                                                                                                                                                                                                                                                                                                                                                                                                                                                                                                                                                                              |
| Manuscript ID                   | bmjopen-2017-018409.R2                                                                                                                                                                                                                                                                                                                                                                                                                                                                                                                                                                                                                                                                                                                                                                                                       |
| Article Type:                   | Research                                                                                                                                                                                                                                                                                                                                                                                                                                                                                                                                                                                                                                                                                                                                                                                                                     |
| Date Submitted by the Author:   | 20-Sep-2017                                                                                                                                                                                                                                                                                                                                                                                                                                                                                                                                                                                                                                                                                                                                                                                                                  |
| Complete List of Authors:       | Dean, Sarah; PenCLAHRC University of Exeter Medical School, Poltawski, Leon; University of Exeter Medical School<br>Forster, Anne; University of Leeds, Academic Unit of Elderly Care and Rehabilitation<br>Taylor, Rod; University of Exeter, Peninsula Medical School<br>Spencer, Anne<br>James, Martin; South West NHS Trust<br>Allison, Rhoda; Torbay and Southern Devon Health and Care NHS Trust<br>Stevens, Shirley; University of Exeter Medical School<br>Norris, Meriel; Brunel University London<br>Shepherd, Anthony; University of Portsmouth, Sport and Exercise Science<br>Landa, P; University of Exeter, Medical School<br>Pulsford, Richard; University of Exeter, Sports and Health Science<br>Hollands, Laura; University of Exeter Medical School<br>Calitri, Raff; University of Exeter Medical School |
| <b>Primary Subject Heading</b>: | Rehabilitation medicine                                                                                                                                                                                                                                                                                                                                                                                                                                                                                                                                                                                                                                                                                                                                                                                                      |
| Secondary Subject Heading:      | Cardiovascular medicine, Health services research                                                                                                                                                                                                                                                                                                                                                                                                                                                                                                                                                                                                                                                                                                                                                                            |
| Keywords:                       | STROKE MEDICINE, REHABILITATION MEDICINE, Clinical trials < THERAPEUTICS                                                                                                                                                                                                                                                                                                                                                                                                                                                                                                                                                                                                                                                                                                                                                     |
|                                 |                                                                                                                                                                                                                                                                                                                                                                                                                                                                                                                                                                                                                                                                                                                                                                                                                              |

SCHOLARONE™  
Manuscripts

**Title** Community-based Rehabilitation Training after stroke: Results of a pilot randomised controlled trial (ReTrain) investigating acceptability and feasibility

Sarah G Dean<sup>1</sup>, Leon Poltawski<sup>1</sup>, Anne Forster<sup>2</sup>, Rod S Taylor<sup>1</sup>, Anne Spencer<sup>1</sup>, Martin James<sup>1,3</sup>, Rhoda Allison<sup>4</sup>, Shirley Stevens<sup>1</sup>, Meriel Norris<sup>5</sup>, Anthony I Shepherd<sup>6</sup>, Paolo Landa<sup>1</sup>, Richard M Pulsford<sup>7</sup>, Laura Hollands<sup>1</sup>, Raff Calitri<sup>1</sup>.

<sup>1</sup>University of Exeter Medical School, Exeter, EX1 2LU, UK.

<sup>2</sup>Academic Unit of Elderly Care and Rehabilitation, University of Leeds, Bradford, BD9 6RJ, UK.

<sup>3</sup>Royal Devon & Exeter Hospital, Exeter, EX2 5DW, UK.

<sup>4</sup>Torbay and South Devon NHS Foundation Trust, Torquay, TQ2 7TD, UK.

<sup>5</sup>Department of Clinical Sciences, Brunel University London, Middlesex UB8 3PH, UK.

<sup>6</sup> Department of Sport and Exercise Science, University of Portsmouth, Portsmouth, PO1 2ER.

<sup>7</sup>Sports & Health Sciences, University of Exeter, Exeter, EX1 2LU, UK.

**Corresponding author**

Associate Professor Sarah Dean,

Psychology Applied to Rehabilitation and Health,

University of Exeter Medical School,

College House

St Luke's Campus,

Exeter,

EX1 2LU,

Email: [s.dean@exeter.ac.uk](mailto:s.dean@exeter.ac.uk)

01392 722984

**Word count 4493 exc tables**

1  
2  
3  
4  
5  
6  
7  
8 **Key words:** Stroke, Rehabilitation Medicine, Clinical Trials.

9  
10 **Abstract**

11 **Objectives:** To assess acceptability and feasibility of trial processes and the ReTrain  
12 intervention including an assessment of intervention fidelity. **Design:** A two-group, assessor-  
13 blinded, randomised controlled trial with parallel mixed methods process and economic  
14 evaluations. **Setting:** Community settings across two sites in Devon. **Participants:** Eligible  
15 participants were: 18 years old or over, with a diagnosis of stroke and with self-reported  
16 mobility issues, no contraindications to physical activity, discharged from National Health  
17 Service (NHS) or any other formal rehabilitation programme at least 1 month prior, willing  
18 to be randomised to either control or ReTrain and attend the training venue, possessing  
19 cognitive capacity and communication ability sufficient to participate. Participants were  
20 individually randomised (1:1) via a computer generated randomisation sequence minimised  
21 for time since stroke and level of functional disability. Only outcome assessors independent  
22 of the research team were blinded to group allocation. **Interventions:** ReTrain comprised (1)  
23 an introductory one-to-one session; (2) ten, twice weekly group classes with up to two  
24 trainers and eight clients; (3) a closing one-to-one session, followed by three drop-in  
25 sessions over the subsequent three months. Participants received a bespoke home-based  
26 training programme. All participants received treatment as usual. The control group  
27 received an exercise after stroke advice booklet. **Outcome measures:** Candidate primary  
28 outcomes included functional mobility and physical activity. **Results:** Forty-five participants  
29 were randomised (ReTrain=23; Control=22); data were available from 40 participants at six  
30 months follow-up (ReTrain=21; Control=19) and 41 at nine months follow-up (ReTrain=21;  
31 Control=20). We demonstrated ability to recruit and retain participants. Participants were  
32 not burdened by the requirements of the study. We were able to calculate sample estimates  
33 for candidate primary outcomes and test procedures for process and health economic  
34 evaluations. **Conclusions:** All objectives were fulfilled and indicated that a definitive trial of  
35 ReTrain is feasible and acceptable.

36  
37  
38  
39  
40  
41  
42  
43  
44  
45  
46 **Registration:** ClinicalTrials.gov: trial number NCT02429180.

47  
48 **Funding:** The Stroke Association TSA 2014-13

**Strengths and limitations of this study**

- A community-based exercise intervention after stroke developed with service users
- A pilot randomised trial developed following MRC guidelines on complex interventions
- Mixed-method approach for answering feasibility and acceptability objectives
- Objective physical activity capture via accelerometry but subjective self-report outcomes for functional mobility and psycho-social measurements

For peer review only



## Introduction

Five years after initial stroke, one in three individuals have residual physical impairment<sup>1</sup>, equating to over 300,000 individuals in the United Kingdom (UK) living with disability from stroke<sup>2</sup>. Provision of stroke rehabilitation is typically front loaded, with resources focussed on in-patient care and early supported discharge. Support tapers off after a few months<sup>3</sup> with many individuals reporting unmet long-term needs<sup>4</sup>.

The National Clinical Guideline for Stroke advise for secondary prevention that stroke survivors engage in 150 minutes of physical activity a week, in bouts of 10 minutes or more, starting light and developing across time to moderate levels of intensity<sup>5</sup>. However, many stroke survivors do not meet these recommendations<sup>6 7</sup> due to combinations of personal (e.g., physical or psychological impairments) and environmental factors (e.g., lack of programmes and facilities). To address this problem, community-based programmes are promoted<sup>8-10</sup>. These tend to focus on cardiovascular fitness with less emphasis on functional improvements or on promoting on-going exercise self-management. National stroke guidelines<sup>5</sup> identify the importance of interventions for functional improvement<sup>11</sup> and self-management<sup>12</sup> but evidence is lacking regarding these types of intervention<sup>13</sup>.

Action for Rehabilitation following Neurological Injury (ARNI) is an approach aimed at improving function and facilitating self-management<sup>14</sup> and has a detailed self-help book. The ARNI approach embodies a set of principles (e.g. instilling a commitment to regular exercise) and techniques tailored to individual need. The ARNI Institute trains registered exercise professionals to deliver key ARNI techniques. Clinical Commissioning Groups (CCGs), charitable, and local authorities have started to provide community-based ARNI training for stroke survivors, which has been positively received by participants, carers and practitioners<sup>15</sup>, however there is currently no randomised controlled trial (RCT) evidence for evaluating its impact on stroke outcomes or its cost-effectiveness.

## Background and objectives

Using the Medical Research Council's framework for the development and evaluation of complex interventions<sup>16</sup> and considerable Patient and Public Involvement we have designed a testable programme called Rehabilitation Training (ReTrain)<sup>17-20</sup>. ReTrain is a community-based, manualised group programme combining ARNI principles and key techniques with best practice guidelines for stroke<sup>9 17</sup>. The overall aim of our pilot RCT was to inform the design and delivery of a definitive RCT. Our objectives were to: 1) assess feasibility and acceptability of recruitment (target n=48), randomisation, allocation concealment and outcome assessment blinding; 2) determine retention rates (target of less than 20% attrition); 3) check ReTrain's acceptability and feasibility for participants, and refine the Trainer Manual; 4) test candidate outcome measures, assess their burden, levels of completion, and estimate outcome variance (to inform definitive trial sample size); 5)

perform process evaluation including intervention fidelity assessment; 6) calculate ReTrain costs and assess feasibility of collecting health and social service resource use.

## Methods

A brief methods overview is provided in accordance with guidance for reporting pilot trials<sup>21</sup>; further details are available in the published protocol<sup>22</sup>. Ethics review was conducted by National Research Ethics Service Committee South West Cornwall & Plymouth (REC Ref: 15/SW/04).

### Trial design

ReTrain was a two-group, assessor-blinded, randomised controlled external pilot trial with parallel mixed methods process and economic evaluations. Eligible participants were individually randomised 1:1 to intervention (ReTrain) or control (exercise advice booklet<sup>23</sup>).

### Participants

Inclusion criteria were: i) diagnosis of stroke; ii) any time since stroke but at least 1 month since discharge from NHS physical rehabilitation services; iii) able to walk independently indoors with or without mobility aids, but with self-reported difficulty with stairs, slopes or uneven surfaces; iv) willingness to be randomised and attend the training venue; v) cognitive capacity and communication ability sufficient to participate.

Exclusion criteria were: less than 18 years old, currently (or within one month of) receiving ARNI training or have contraindications to moderate to vigorous physical activity (adapted from American College of Sports Medicine guidelines<sup>24</sup>). Participants were recruited from two CCGs. Participants were identified by: (1) clinicians in NHS primary care, hospital and community stroke services; (2) contacts in the local Clinical Research Network and Clinical Research Facility; (3) promotion via local stroke support networks (e.g. Stroke Association); (4) word of mouth, study flyers and adverts.

### Intervention

ReTrain aims to: (1) enhance function through task-related practice, teaching compensatory techniques, and providing targeted strength training (cardiovascular fitness gains also occur through these activities); (2) develop self-management skills for on-going rehabilitation; (3) deliver personalised training using negotiated goals and (4) instil a commitment to regular exercise for health improvement and longer-term maintenance. ReTrain facilitates safe and efficient practice of walking in varied terrains, kerbs, cambers and in crowds, turning and moving quickly, climbing steps and stairs without rails, getting to and from the floor without furniture or other aids, and moving without mobility aids or while carrying loads. Training is based on a manual and led by personal trainers on the UK Register of Exercise Professionals (level 3 or above) who are ARNI-trained and accredited and have had additional training in the delivery of ReTrain. There was a maximum ratio of one trainer to four stroke survivors.

1  
2  
3 ReTrain was delivered in a community setting (one gym, two church halls, one community  
4 centre) with twice weekly two hour sessions over three months, comprising: an introductory  
5 one-to-one session (home visit); ten, twice-weekly group classes with up to two trainers and  
6 eight clients (training venue); a closing one-to-one session (home visit); followed by three  
7 (one per month) drop-in sessions. Participants completed bespoke home-based training  
8 (homework) throughout.  
9  
10

## 11 Control

12 All participants received treatment as usual. This ranged from zero treatment to  
13 engagement with any health service(s). We requested that all trial participants did not  
14 participate in additional physical rehabilitation (either NHS or private) but we could not  
15 prevent them from doing so. We did not monitor control group participation in any  
16 treatments during the trial but did record health service use at the end of the trial for all  
17 participants. The control group also received an advice booklet about exercise after stroke<sup>23</sup>.  
18  
19  
20  
21  
22

## 23 Outcomes

24  
25 **Feasibility, acceptability and process outcomes:** numbers and details of those approached;  
26 recruitment and retention figures. **Acceptability of randomisation, outcome measurement**  
27 **burden, and the intervention:** completion of questionnaires and objective assessments;  
28 interviews with ten intervention and ten control group members, and the trainers. **Safety:**  
29 Adverse events<sup>25</sup> identified via trainer and ReTrain participants (during the programme) and  
30 participant reports (all participants during 6 and 9-month assessments). **Intervention**  
31 **fidelity:** attendance registers, accelerometry, exercise 'homework' diaries, trainer  
32 completed session checklists and video analysis of (early, middle and late programme)  
33 training sessions.  
34  
35  
36  
37

38 We tested a range of candidate primary and secondary outcome measures. **Primary**  
39 **Outcomes:** Rivermead Mobility Index<sup>26 27</sup>; Timed Up and Go Test<sup>28</sup>; modified Patient-Specific  
40 Functional Scale<sup>29</sup>; 7-day objective physical activity levels using wrist-worn accelerometry  
41 (GENEActiv, Activinsights, Kimbolton, Cambridge UK) and a physical activity diary. **Secondary**  
42 **Outcomes:** Stroke Self-efficacy Questionnaire<sup>30</sup>; Fatigue Assessment Scale<sup>31 32</sup>; exercise  
43 beliefs and exercise self-efficacy questionnaires<sup>33</sup>; SF12<sup>34</sup>; EQ-5D-5L<sup>35</sup>; Stroke Quality of Life  
44 (QoL) questionnaires<sup>36</sup>; Carer Burden Index<sup>37</sup>; and Health and Social Service use through a  
45 Service Receipt Inventory<sup>38</sup>.  
46  
47  
48  
49

50 Physical outcome baseline assessments (completed by research team) and follow-up  
51 assessments (at 6 and 9-months, completed by blinded assessor) were conducted in the  
52 participant's home. Researchers visited participants to fit the accelerometer, drop off  
53 questionnaires and diary one week prior to blind assessor visits. Assessors administered  
54 primary outcome physical measures and collected accelerometers, questionnaires and  
55 diaries.  
56  
57  
58  
59  
60

### Sample size

We required 48 participants (24 per group) as (a) 30 complete data sets are recommended for pilot studies to estimate outcome variance<sup>39</sup> and (b) we wanted to investigate variations in context by running the intervention three times (*i.e.* 3 x 8 patients). This number also allowed estimation of a predicted attrition rate of 20% with a precision of  $\pm 5\%$  with 95% certainty.

### Randomisation and blinding

The random sequence was computer generated with minimisation for time since stroke ( $\leq 3$  months versus  $> 3$  months) and level of functional disability (modified Rankin Scale (mRS)<sup>40</sup> score  $\leq 2$  versus  $> 2$ ). Allocation concealment was ensured by using a password protected validated web-based remote randomisation service supported by the Peninsula Clinical Trials Unit (PenCTU). The Trial Manager requested randomisation only after a cohort of participants had been consented.

Participants, trainers providing the intervention, and researchers conducting the process and economic evaluations could not be blinded to allocation. However, outcomes were assessed by independent researchers (not based at research centre) who were blinded to group allocation. Participants were reminded not to reveal their allocation to assessors but any un-blinding was recorded; after assessments assessors were asked to guess participant allocation.

### Data Analysis

Analysis was primarily descriptive with participant flow summarised and estimates of screening, recruitment and attrition reported. Means and standard deviations for all outcomes are reported at baseline, 6 and 9-months follow-up for each group.

Intervention fidelity was assessed using mixed methods: qualitative video analysis comparing the Trainer Manual standard versus observed technique (two researchers independently assessed videos) combined with interview data and summary scores from trainer completed session checklists. Qualitative data were manually analysed descriptively and with content analysis for trial processes; additional thematic analysis was used for interview data. One person (MN) led the qualitative analysis but this was then discussed (MN & SD), checked (RC) and agreed (MN, SD, LP, RC).

We used a micro-costing approach to calculate costs associated with ReTrain: staff time (trainers, administrator, facilitators), venue hire, training equipment (annualised over time), course materials, consumables, travel costs (participants, trainers and facilitators). The costs of the intervention were estimated as a cost per programme and a cost per participant. The estimated costs of the intervention per participant were based on the number of participants enrolled on the programme. The base case scenario assumed the average

number of participants per programme across all cohorts. Sensitivity analyses were conducted using the minimum and maximum number of participants enrolled for the programme and the quantity of programme materials that were wasted. We analysed the relative benefits of calculating health related QoL using SF-6D (developed from the SF-12) over the QALY calculated (using EQ-5D 5L) from the baseline measures.

Sample size estimates for a definitive trial were calculated for candidate primary outcomes using the standard deviation observed in this pilot population and published minimal clinical important difference (MCID) at 90% power and 5% alpha, and assuming 20% attrition. Where no published MCID could be sourced, we assumed a small to moderate effect size of 0.4 of a standard deviation<sup>41</sup>. The trial statistician undertook calculations using the 'samspi' command in STATA v14.2

## Results

Recruitment took place from June 2015 to January 2016. The intervention ran in four cohorts, participant flows are shown for each (Figure 1) and for the trial overall (Figure 2). Initial recruitment was slow so to prevent late running of the trial we split the first cohort. Six-month follow-up outcome assessments took place January to July 2016 and 9-month follow-up April to October 2016.

**Objective 1:** *Assess the feasibility and acceptability of recruitment, randomisation, allocation concealment and processes for outcome assessment and blinding*

We screened 115 individuals to recruit 50 participants (Figure 1) in 8 months (2 months ahead of schedule). Of these, 45 (90%) were randomised (Figure 1 and 2). Five individuals withdrew prior to randomisation due to ill health or the time lag between agreeing to take part and a cohort being ready to randomise. Table 1 shows baseline characteristics of those randomised, indicating a balance of characteristics across trial arms.

**Table 1** Baseline participant demographics

|                                        | ReTrain<br>(N= 23) | Control<br>(N=22) |
|----------------------------------------|--------------------|-------------------|
| <b>Gender, n</b>                       |                    |                   |
| Male (%)                               | 16 (70%)           | 14 (67%)          |
| <b>Age (years): mean (SD)</b>          | 70 (12)            | 71 (10)           |
| <b>Age Category (N=45): n (%)</b>      |                    |                   |
| <45                                    | 1 (4%)             | 0 (%)             |
| 46-50                                  | 0 (0%)             | 1 (5%)            |
| 51-60                                  | 3 (13%)            | 2 (9%)            |
| 61-70                                  | 10 (43%)           | 6 (27%)           |
| 71-80                                  | 5 (22 %)           | 8 (36%)           |
| 81-90                                  | 2 (9%)             | 5 (23%)           |
| 90+                                    | 2 (9%)             | 0 (0%)            |
| <b>Time Since Stroke (no. months):</b> |                    |                   |

|                                                                                    |          |           |
|------------------------------------------------------------------------------------|----------|-----------|
| < 12                                                                               | 3 (13%)  | 3 (14%)   |
| 12-24                                                                              | 4 (17%)  | 4 (18%)   |
| 25-48                                                                              | 5 (22%)  | 5 (23%)   |
| 49-72                                                                              | 2 (9%)   | 5 (23%)   |
| 73-96                                                                              | 4 (17%)  | 2 (9%)    |
| 97+                                                                                | 5 (22%)  | 3 (14%)   |
| <b>Time Since Stroke Minimisation Categories (months):n, (%)</b>                   |          |           |
| <=3 months                                                                         | 1 (4%)   | 0 (0%)    |
| >3 months                                                                          | 22 (96%) | 22 (100%) |
| <b>Type of Stroke, n (%)</b>                                                       |          |           |
| Haemorrhagic                                                                       | 3 (13%)  | 1 (5%)    |
| Ischaemic                                                                          | 15 (65%) | 15 (68%)  |
| Both                                                                               | 0 (0%)   | 1 (5%)    |
| Missing                                                                            | 5 (22%)  | 5 (23%)   |
| <b>Stroke Rehabilitation (weeks):</b>                                              |          |           |
| n,                                                                                 | 21,      | 21,       |
| Average no. weeks (SD)                                                             | 8 (9)    | 14 (19)   |
| Median no. weeks                                                                   | 6        | 12        |
| Range                                                                              | 0-32     | 0-88      |
| Unknown length rehab: n                                                            | 2        | 1         |
| <b>Functional Disability (Simplified Modified Rankin Scale score- sMRS): n (%)</b> |          |           |
| 0                                                                                  | 1 (4%)   | 0 (0%)    |
| 1                                                                                  | 2 (9%)   | 1 (5%)    |
| 2                                                                                  | 4 (17%)  | 9 (41%)   |
| 3                                                                                  | 16 (70%) | 12(55%)   |
| <b>sMRS minimisation categories: n(%)</b>                                          |          |           |
| <=2                                                                                | 7 (30%)  | 10 (45%)  |
| >2                                                                                 | 16 (70%) | 12 (55%)  |
| <b>Co-morbidities<sup>^</sup>, n (%)</b>                                           |          |           |
| Hypertension                                                                       | 18 (78%) | 18 (82%)  |
| Type 2 Diabetes Mellitus                                                           | 4 (17%)  | 4 (18%)   |
| Depression                                                                         | 8 (35%)  | 5 (23%)   |
| Chronic Kidney Disease                                                             | 2 (9%)   | 1 (4%)    |
| Asthma / COPD                                                                      | 4 (17%)  | 3 (14%)   |
| Other                                                                              | 5 (22%)  | 3 (14%)   |
| <b>Medications<sup>^</sup>, n (%)</b>                                              |          |           |
| Diuretics                                                                          | 3 (13%)  | 1 (5%)    |
| Anticoagulants                                                                     | 8 (35%)  | 10 (45%)  |
| Antiplatelet                                                                       | 15 (65%) | 12 (55%)  |
| Antihypertensives                                                                  |          |           |
| Calcium Channel Blockers                                                           | 6 (26%)  | 14 (64%)  |
| ACE inhibitors                                                                     | 13 (57%) | 8 (36%)   |
| Other                                                                              | 9 (39%)  | 7 (32%)   |
| Statins                                                                            | 18 (78%) | 19 (86%)  |
| Anti-depressants                                                                   | 8 (35%)  | 5 (23%)   |
| Diabetes medication                                                                | 4 (17%)  | 4 (18%)   |

|                                       |             |             |
|---------------------------------------|-------------|-------------|
| Chronic pain medication               | 12 (52%)    | 8 (36%)     |
| Other                                 | 5 (22%)     | 3 (14%)     |
| <b>Employment Status, n (%)</b>       |             |             |
| Employed (and working)                | 2 (9%)      | 1 (5%)      |
| Retired                               | 18 (78%)    | 15 (68%)    |
| Semi-retired                          | 1 (4%)      | 0 (0%)      |
| Unemployed                            | 2 (9%)      | 5 (27%)     |
| <b>Pre-stroke Exercise History, n</b> |             |             |
| Exerciser (%)                         | 10 (43%)    | 8 (36%)     |
| <b>Mini Mental State Exam:</b>        |             |             |
| n,                                    | 22*,        | 22,         |
| Mean (SD)                             | 27.5 (2.54) | 27.9 (3.01) |
| Median                                | 28          | 29          |
| Range                                 | 19– 30**    | 19-30**     |

^ Participants may have more than one co-morbidity / medication.

\*1 participant with severe aphasia had difficulties completing the MMSE. The participant could understand and follow instructions and was considered cognitively able to participate in the trial.

\*\*Higher scores indicate better cognitive function. Participants range from no to moderate degree of cognitive impairment.

Blinding of outcome assessors was considered successful as only 2/41 (5%) participants revealed their allocations after completion of outcome measures, both were intervention participants. Different assessors were used for subsequent assessments therefore risk of bias was minimised.

### **Objective 2: Acquire retention rates and outcome variance**

Forty out of 45 (88%, 95% CI: 76% to 96%) completed 6-month and 9-month follow-ups. Despite fewer people being randomised than expected, high retention preserved the number of datasets needed to perform our sample size estimates (Table 2).

**Table 2 Sample estimates for potential candidate primary outcomes from ReTrain pilot RCT**

| Primary Outcome Measure                    | Sample Size Estimates <sup>a</sup> | Minimal Clinically Important Difference (MCID) | Observed SD range | Effect size (MCID/SD) |
|--------------------------------------------|------------------------------------|------------------------------------------------|-------------------|-----------------------|
| Rivermead Mobility Index                   | 36 – 44                            | 3.0 <sup>b</sup>                               | 2.33 – 2.66       | 1.13 – 1.29           |
| Timed Up and Go                            | 1,438 – 2,673                      | 1.2 – 3.4 <sup>c</sup>                         | 15.69 – 21.39     | 0.06 – 0.22           |
| Modified Patient Specific Functional Scale | 16 – 200                           | 1.0 – 3.0 <sup>c</sup>                         | 1.58 – 1.94       | 0.52 – 1.7            |

|                                      |            |               |                |                         |
|--------------------------------------|------------|---------------|----------------|-------------------------|
| Physical Activity<br>(Accelerometer) | 350 - 1458 | Not available | Not applicable | 0.2 – 0.45 <sup>d</sup> |
|--------------------------------------|------------|---------------|----------------|-------------------------|

<sup>a</sup>Figures represent overall (two group) sample size estimates required for a definitive trial. Sample sizes estimated for 1:1 allocation at 90% power and 5% alpha and assuming 20% attrition. Calculations are conservative showing range from best case scenario (largest MCID and smallest SD) to worst case scenario (smallest MCID and largest SD) of SDs observed in this trial and published MCIDs where available.

<sup>b</sup>MCID available from stroke research for the Rivermead Mobility Index ([http://www.stroking.ca/psycho/rmi\\_psycho/](http://www.stroking.ca/psycho/rmi_psycho/)).

<sup>c</sup>MCIDs identified from other disease groups used as proxies as no published stroke MCIDs<sup>42,43</sup>.

<sup>d</sup>There are no MCID data available for PA (accelerometry) in stroke (or any other cardio vascular disease) we therefore applied sample size calculations undertaken for a relevant ongoing HTA NIHR trial which estimated n= 562 (effect size 0.3) or n= 413 (effect size 0.35) (<http://www.isrctn.com/ISRCTN15644451>).

**Objective 3:** Check ReTrain's acceptability and feasibility for participants, and refine the Trainer manual

Eleven themes from 20 qualitative interviews summarise participants' views, Table 3 provides illustrative quotes.



**Table 3 Participant quotes from qualitative interviews****Acceptability**

"It is ten weeks, you do it twice a week. Personally for the first say three or four weeks, I'd think well this is getting me nowhere, but then you think that you notice things, things are improving and at the end of ten weeks you want to go for twenty weeks (4:119-125)

"I'd tell them [another stroke survivor] to go ahead and do it and to take it step by step and not to worry about it. Because you are treated with great respect, it was wonderful and they were. I'll never be able to speak highly enough of them." (25:388-390)

**Intervention approach**

"It opened my eyes to what can be done you know. How can I put it? It wasn't as if I believed that I couldn't do something it was being pointed in the right direction...heh I can do it...Great you've done it, you did it and you do it again. Yeah it was great" (4:358-361). "It wasn't easy at first, but I used to manage it" (5:246)

"It was the way they addressed how you do your exercises. What it is doing to you and all the rest of it. Now to me that was absolutely important, because it made sense of why you are doing all this pumping up and down, and if you can't do that, do this." (22:252-255)

"It was you felt as if you were a human being with them. You know and you were treated with respect...and although you couldn't do things and you felt a bit of an idiot, they never let you feel like that" (25:567-572).

"It's a bit like playing scales...it's not creative but as I gradually realise it, it could potentially be creative...doing something that I had been doing without thinking before and now couldn't. ...Now and again I walk without my stick without realising it, that's creative I think." (6:354-392)

**Impact of programme - psychologically**

"I suppose it is attitude of mind as much as anything. I mean I felt I'd gone through that stage of training and that I was going to get better. It built my spirit up...I felt as if it, well it was worth the three months you know and at the end of the day I hope I'm going to get back to something like normal" (16:358-365)

"It really helped me mentally, you know I thought right I can do this because before I was going into my shell, thinking I can't do this and I can't do that. Oh I am not going out. Then I went on that [ReTrain] and it gave me an element of confidence." (43:562-565).

**Impact of programme – physically**

"you started to notice they are actually starting to fall into place. I don't remember doing that last time. But I am doing it now great get on with it I am doing it faster now" (4:189-190)

"I know if I went down which I did one day in the hall in the early stages of coming back home and I did manage to get up and walk upstairs...but I wouldn't have been able to do that had I not had that [training]" (16:475-477)

**Homework adherence**

"trainers were always on about doings exercises at home...I could never pin him down to how long that should be for though" (6; line 624).

**Programme technique adherence**

"I think that was the big thing you saw the benefits after the second, well the first or second session we had. 'Oh we can do

**a) Study Information**

Participants considered information received as adequate. Five noted that information was limited, but most were unconcerned. Two added that too much information may have been detrimental to recruitment. Four others were satisfied with the information they received.

**b) Outcome Measure Burden**

Participants found the assessment process acceptable. Fifteen indicated no burden. Three participants indicated that they needed help from their carers to complete questionnaires,

1  
2  
3 particularly recalling and reporting health resource use, placing a time burden on their  
4 carer.  
5  
6

7  
8 *c) Venue*

9 Half of the ReTrain participants were very positive about the training venues. Important  
10 features were: space, provision of fluids (water, tea), easy availability of parking. For some  
11 the travelling distance was a concern; two noted their venue (a gym) was very noisy,  
12 insufficiently heated and the session time was too early. Some noted the small amount of  
13 equipment as an advantage (it aided transfer of exercises to their home) whereas others felt  
14 the equipment was not sufficiently specialist.  
15  
16

17  
18 *d) Adherence to ReTrain (see also Objective 5)*

19 All ten ReTrain interviewees reported training in the five core (ARNI) techniques. Homework  
20 was discussed by all but lacked specificity, only two had clear homework examples that  
21 were effectively incorporated into their training. Although goal setting was a core element,  
22 only four specifically identified how their goals were linked into their overall programme.  
23 Three participants reported not attending drop-in sessions due to lack of information. Of  
24 three who attended two suggested the drop-ins repeated previous sessions.  
25  
26  
27

28  
29 *e) Group dynamics*

30 Group working was positively regarded and seen as integral to programme effectiveness.  
31 There were exceptions, one participant did not find 'performing' in public a positive  
32 experience. Likewise some suggested that groups reduced training intensity relative to one-  
33 to-one training.  
34  
35

36  
37 *f) Co-morbidities*

38 Participants identified several co-morbidities e.g.: knee replacements, cancer, angina,  
39 diabetes, amputation and depression. These had potential to impact on both the training  
40 and research participation but for most any concerns were accommodated by trainers.  
41 However, in one case some uncomfortable discussions occurred before an appropriate  
42 balance of perceived capability and training challenges was reached. Three participants with  
43 visual deficits, dyslexia and dysgraphia mentioned difficulties completing the research  
44 documents.  
45  
46  
47

48  
49 *g) Carer Health*

50 Two ReTrain participants commented on how commitment to the programme impacted on  
51 their partner's health: one stopped attending sessions because the time away resulted in  
52 excessive strain on his wife; another expressed similar concern but did not stop attending.  
53  
54

55  
56  
57  
58  
59  
60 *h) Trainer Manual*

1  
2  
3 We refined the Trainer Manual throughout the study. Issues raised during interviews guided  
4 revisions including greater emphasis and clarification about use of goal setting, drop-ins,  
5 homework diaries, and managing participants with co-morbidities.  
6

7  
8 **Objective 4:** *Assess outcome completion and burden*

9  
10 We collected baseline (n=41), 6-month (n=40) and 9-month (n=41) follow-up data on the  
11 majority of participants (Figure 2). Accelerometry wear time (24 hours for 7 days) was high,  
12 most having 6 or more valid days ( $\geq 16$ hrs per day, including  $\geq 1$  weekend day). Only two  
13 participants at baseline, one at 6-months and three at 9-months did not achieve 4 valid days  
14 of wear time. There was very little missing data. For three primary outcome measures there  
15 was only one participant with missing data at any given assessment time-point. For  
16 secondary outcomes there was either no missing data or only one to two participants with  
17 missing data at each time-point, apart from the exercise diary (between two and four  
18 participants with missing data at each time-point) and the Service Receipt Inventory  
19 (between three and seven participants with missing data). There were eight participants  
20 without accelerometer data at 9-month assessment owing to hardware (device) and  
21 software (data extraction method) malfunctions.  
22  
23  
24

25  
26 **Objective 5:** *Perform process evaluation with an assessment of intervention fidelity*

27  
28 We implemented a comprehensive video recording schedule (over 200 recordings) to  
29 capture participant and trainer adherence to key ARNI techniques. Both trainers and  
30 participants demonstrated high adherence. Modifications to techniques (to accommodate  
31 participant co-morbidities) were captured and informed Trainer Manual development.  
32

33  
34 We combined metrics from attendance registers and homework records to generate a  
35 'dose'/adherence score, categorising individuals into low (< 50%), medium (50% - 75%) and  
36 high (>75%) adherence categories. Of 23 ReTrain participants two did not receive the  
37 intervention (one returned to work; one withdrew from study), five had low adherence, five  
38 medium adherence, and eleven high adherence. These latter 16 (70%) were considered to  
39 have received sufficient 'dose' of ReTrain.  
40  
41

42  
43 Trainers varied in their completion of session checklists: pre-exercise and end-of-session  
44 components were less consistently reported compared to ARNI techniques but overall there  
45 was good adherence to programme delivery.  
46

47  
48 **Objective 6:** *Calculate the cost of intervention delivery and feasibility of collecting health and  
49 social service resource use.*

50  
51 ReTrain costs were generated for each cohort, accounting for different programme sizes  
52 (four or eight participants) and venues. Costs per participant ranged from £615 to £972. The  
53 total per participant cost for ReTrain (assuming 24 participants) was £777. We conducted  
54 medical notes review on 35/41 participants and compared this 'gold standard' with self-  
55 reported health resource use. Participants reported using fewer resources compared to case  
56  
57  
58  
59  
60

1  
2  
3  
4  
5  
6  
7  
8  
9  
10  
11  
12  
13  
14  
15  
16  
17  
18  
19  
20  
21  
22  
23  
24  
25  
26  
27  
28  
29  
30  
31  
32  
33  
34  
35  
36  
37  
38  
39  
40  
41  
42  
43  
44  
45  
46  
47  
48  
49  
50  
51  
52  
53  
54  
55  
56  
57  
58  
59  
60

notes review. Data from medical notes informed the cost-utility and effectiveness frameworks for use in a definitive trial.

**Descriptive analysis of participant outcomes**

Primary and secondary outcome data are summarised in Table 4a and 4b respectively.

For peer review only

**Table 4a: Number, means and standard deviations as a function of trial arm and measurement time point for candidate primary outcome measures in the ReTrain pilot trial**

| Measures: n, Mean (SD)                                                          | Data collection time point |                        |                        |                        |                        |                        |
|---------------------------------------------------------------------------------|----------------------------|------------------------|------------------------|------------------------|------------------------|------------------------|
|                                                                                 | Baseline                   |                        | 6 month <sup>^</sup>   |                        | 9 month <sup>^</sup>   |                        |
|                                                                                 | ReTrain (N=23)             | Control (N=22)         | ReTrain (N=21)         | Control (N=20)         | ReTrain (N=21)         | Control (N=20)         |
| Rivermead Mobility Index                                                        | 23,<br>11.41 (3.05)        | 22,<br>11.68 (2.23)    | 21,<br>12.14 (2.73)    | 19,<br>12.47 (1.87)    | 21,<br>12.24 (3.27)    | 20,<br>12.65 (1.81)    |
| Modified Patient Specific Functional Scale                                      | 22,<br>2.95 (1.85)         | 22,<br>2.55 (1.23)     | 21,<br>3.47 (2.12)     | 19,<br>3.56 (1.69)     | 21,<br>3.25 (2.03)     | 20,<br>3.74 (1.86)     |
| Timed Up and Go (secs) <sup>a</sup>                                             | 23,<br>27.57 (27.57)       | 21,<br>21.24 (11.18)   | 21,<br>20.76 (19.64)   | 19,<br>16.37 (9.69)    | 21,<br>20.76 (19.25)   | 20,<br>15.95 (12.00)   |
| Physical Activity: <b>Diary</b> *                                               | 21,<br>6.67 (19.20)        | 20,<br>10.69 (17.39)   | 21,<br>17.39 (24.28)   | 19,<br>25.60 (34.98)   | 19,<br>13.92 (22.25)   | 20,<br>35.11 (49.70)   |
| Physical Activity (Accelerometer):<br><b>Total PA minutes</b> * <sup>b</sup>    | 21,<br>145.10 (118.27)     | 20,<br>165.56 (139.09) | 19,<br>134.88 (129.77) | 18,<br>178.15 (155.07) | 16,<br>152.08 (118.52) | 17,<br>197.42 (144.31) |
| Physical Activity (Accelerometer):<br><b>Light PA minutes</b> * <sup>b</sup>    | 21,<br>92.78 (93.15)       | 20,<br>110.18 (115.65) | 19,<br>95.67 (105.50)  | 18,<br>121.80 (122.46) | 16,<br>99.33 (99.54)   | 17,<br>134.54 (126.36) |
| Physical Activity (Accelerometer):<br><b>MVPA PA minutes</b> * <sup>b</sup>     | 21,<br>52.32 (68.94)       | 20,<br>55.38 (39.66)   | 19,<br>39.21 (39.33)   | 18,<br>56.35 (51.26)   | 16,<br>52.75 (60.03)   | 17,<br>62.88 (41.73)   |
| Physical Activity (Accelerometer):<br><b>Moderate PA minutes</b> * <sup>b</sup> | 21,<br>50.53 (66.77)       | 20,<br>53.38 (37.04)   | 19,<br>37.73 (37.40)   | 18,<br>53.07 (43.99)   | 16,<br>51.11 (58.54)   | 17,<br>60.93 (40.84)   |
| Physical Activity (Accelerometer):<br><b>Vigorous PA minutes</b> * <sup>b</sup> | 21,<br>1.79 (3.85)         | 20,<br>2.00 (3.96)     | 19,<br>1.48 (2.39)     | 18,<br>3.28 (8.14)     | 16,<br>1.64 (2.38)     | 17,<br>1.94 (2.33)     |

Note: <sup>^</sup> post randomisation; \*Average minutes of physical activity per day; <sup>a</sup>Precision to 10 ms; <sup>b</sup>Measurement recorded 100 times a second (accelerometer set to a sampling frequency of 100 Hz).

**Table 4b: Number, means and standard deviations as a function of trial arm and measurement time point for candidate secondary outcome measures in the ReTrain pilot trial**

| Measures: n, Mean (SD)                                          | Data collection time point |                      |                      |                     |                      |                      |
|-----------------------------------------------------------------|----------------------------|----------------------|----------------------|---------------------|----------------------|----------------------|
|                                                                 | Baseline                   |                      | 6 month <sup>^</sup> |                     | 9 month <sup>^</sup> |                      |
|                                                                 | ReTrain<br>(N=23)          | Control<br>(N=22)    | ReTrain<br>(N=21)    | Control<br>(N=20)   | ReTrain<br>(N=21)    | Control<br>(N=20)    |
| Fatigue Assessment Scale                                        | 23,<br>27.17 (7.14)        | 22,<br>25.49 (7.44)  | 21,<br>24.05 (6.26)  | 19,<br>24.05 (8.86) | 20,<br>27.45 (5.95)  | 20,<br>25.83 (9.14)  |
| Stroke Self-efficacy Questionnaire                              | 22,<br>72.41 (22.00)       | 22,<br>73.46 (17.87) |                      |                     | 20,<br>73.73 (19.63) | 20,<br>74.40 (16.94) |
| Outcome expectations for exercise Scale (Exercise Beliefs)      | 23,<br>3.66 (0.70)         | 22,<br>3.78 (0.52)   |                      |                     | 19,<br>4.03 (0.59)   | 19,<br>3.73 (0.52)   |
| Short self-efficacy for Exercise Scale (Exercise self-efficacy) | 23,<br>3.26 (0.92)         | 22,<br>3.32 (0.89)   |                      |                     | 19,<br>3.32 (0.89)   | 18,<br>3.22 (1.06)   |
| Stroke Quality of Life Scale(Total)                             | 22,<br>3.31 (0.68)         | 22,<br>3.45 (0.69)   |                      |                     | 20,<br>3.38 (0.70)   | 20,<br>3.63 (0.82)   |
| EQ-5D-5L                                                        | 22,<br>0.51 (0.25)         | 20,<br>0.55 (0.24)   |                      |                     | 19,<br>0.52 (0.24)   | 20,<br>0.62 (0.25)   |
| SF-12: Physical Component                                       | 21,<br>33.12 (7.22)        | 20,<br>31.83 (6.69)  |                      |                     | 19,<br>33.74 (6.44)  | 19,<br>33.25 (6.91)  |
| SF-12: Mental Component                                         | 21,<br>50.10 (7.11)        | 20,<br>50.68 (7.98)  |                      |                     | 19,<br>50.47 (6.51)  | 19,<br>48.05 (8.45)  |
| Modified Caregiver Strain Index (Carer Burden)                  | 8,<br>11.39 (8.03)         | 10,<br>7.40 (7.83)   |                      |                     | 9,<br>9.89 (7.22)    | 6,<br>9.50 (8.92)    |

Note: <sup>^</sup> post randomisation; grey cells indicate measurement not taken at this time point

Table 4a and 4b report mean scores across, respectively, candidate primary and secondary outcome measures at each time point of the pilot trial. The trial was not powered to detect differences in outcome between trial arms or over time and so we do not interpret the patterns of means. However, the results clearly demonstrate that we were able to collect the necessary data and retained acceptable completion rates on all measures across all time points of the study. Attrition was lower than the 20% expected. For each outcome measure (except carer burden as not everyone had a carer) we achieved in excess of the 30 cases (i.e. 15 completed measurements per arm) recommended for pilot studies to estimate outcome variance.

### Safety

During assessment periods there was one serious but unrelated event in the intervention group (none in the control group) and slightly fewer overall adverse events in the intervention group (Table 5a).

**Table 5a: Adverse Events (AE) and Serious Adverse Events (SAE) reported during 6 and 9-month outcome assessment periods for both ReTrain and Control group**

|                | Event Type | Total Events     | Attribution |                  |                  |           | N People Reporting Event |
|----------------|------------|------------------|-------------|------------------|------------------|-----------|--------------------------|
|                |            |                  | Related     | Probably Related | Possible Related | Unrelated |                          |
| ReTrain (N=21) |            |                  |             |                  |                  |           |                          |
|                | <b>AE</b>  | 125 <sup>a</sup> | 6           | 5                | 73               | 41        | 19                       |
|                | <b>SAE</b> | 1 <sup>b</sup>   | 0           | 0                | 0                | 1         | 1                        |
| Control (N=20) | Event Type | Total Events     | Related     | Probably Related | Possible Related | Unrelated | N People Reporting Event |
|                | <b>AE</b>  | 150 <sup>c</sup> | 0           | 0                | 0                | 150       | 19                       |
|                | <b>SAE</b> | 0                | 0           | 0                | 0                | 0         | 0                        |

<sup>a</sup>: Muscle soreness (n=26); fatigue (n=58); falls (n=12); trips (n=10); other (n=19; including but not limited to: low mood, itchiness, colds, issues with eyesight, cystitis).

<sup>b</sup>: Ambulance conveyance to A&E due to reaction to antibiotics being taken for chest infection.

<sup>c</sup>: Muscle soreness (n=39); fatigue (n=50); falls (n=19); trips (n=12); other (n=30; including but not limited to: low mood, depression, dizzy spells, sore toes, poor memory, colds, poor sleep, loss of sense of smell, issues with eyesight).

**Table 5b: Adverse Events (AE) and Serious Adverse Events (SAE) reported during ReTrain programme**

|                | Event Type | Total Events   | Attribution |                  |                  |           | N People Reporting Event |
|----------------|------------|----------------|-------------|------------------|------------------|-----------|--------------------------|
|                |            |                | Related     | Probably Related | Possible Related | Unrelated |                          |
| ReTrain (N=21) |            |                |             |                  |                  |           |                          |
|                | <b>AE</b>  | 2 <sup>a</sup> | 7           | 0                | 12               | 3         | 11                       |
|                | <b>SAE</b> | 6 <sup>b</sup> | 0           | 1                | 1                | 4         | 5                        |

<sup>a</sup>: Muscle soreness (n=0); fatigue (n=2); falls (n=10); trips (n=1); other (n=9; including but not limited to: fainting; twisted or swollen ankle, suspected TIA (non-confirmed)).

<sup>b</sup>: Urine retention (n=3); black-out/fainted (n=1); renal & heart failure (n=1); TIA (n=1).

For ReTrain only (Table 5b) there were six serious adverse events during the intervention period: four were unrelated, one possibly related (fainted) and one probably related (TIA) to the intervention. Of the 22 adverse events reported, three of them occurred at the venue (1 x fall; 1 x trip; 1 x ankle strain).

## Discussion

The ReTrain pilot trial met all its pre-stated feasibility objectives: the intervention, trial design and research processes were acceptable to participants as well as feasible and safe to deliver; we demonstrated feasibility of recruitment (recruiting above our target of 48), and retention (less than 20% attrition). At the point of randomisation we were slightly under target (45/48). However due to high retention we preserved the number of datasets required (30) to calculate sample size estimates. Furthermore, participants were not unduly burdened by study requirements and there were high completion rates for most outcome measures. We also successfully rehearsed procedures for process and health economic evaluations as well as trial governance processes (trial management and independent trial steering meetings) and maintained our strong Patient and Public Involvement. Participant interviews, outcome measurement results and fidelity assessments highlighted refinements that we have already, or can, put in place for a future definitive RCT of ReTrain. For example, we have some new insights into how to enhance delivery by trainers and engagement by participants (e.g. by placing more focus on individually tailored goal setting; stressing goal and homework reviews; better explanation and promotion of the drop-in sessions). These are all relatively small amendments that are likely to enhance the impact of the training programme. Our trial compares favourably with another feasibility RCT assessing the delivery of the Bridges stroke self-management programme<sup>44</sup> which had relatively low recruitment, questions regarding programme delivery in addition to usual



1  
2  
3 rehabilitation, and recommendations for further assessment of intervention fidelity. Some  
4 of their findings were similar to ReTrain: participants were broadly positive about their  
5 programme; health professionals found it acceptable to use and researchers noted the lack  
6 of outcome measure sensitivity for detecting change<sup>44</sup>.  
7  
8

### 9 **Limitations and lessons for planning design of a future trial**

10  
11 When planning this study we selected our candidate primary outcome measures on the  
12 basis that they were likely to measure improvements that could be attributed to our  
13 intervention; our pilot work was therefore to determine acceptability and feasibility  
14 (including their psychometric utility) of these measures. However we were not able to  
15 identify a clear candidate primary outcome for a definitive RCT from this pilot work. It is  
16 possible that an 'activities of daily living' measure (as typically used in rehabilitation studies)  
17 may be more useful in a future definitive trial. Identifying robust outcome measures in  
18 rehabilitation trials is a common problem<sup>45</sup> compounded by variability in stroke related  
19 disability and participants' comorbidities. This pilot trial was not designed (statistically  
20 powered) to test for differences between treatment arms, so no inferential analyses were  
21 performed. Any perceived trend (or absence of a trend) should not be interpreted as an  
22 indication of an effect (or its absence) and outcomes should not be selected based upon any  
23 assumed trend. Acceptability outcomes coupled with a pragmatic and efficient (cost-  
24 effective) trial design better inform choice of outcome. From our sample the Timed Up and  
25 Go task would be unsuitable due to potentially large sample size requirements (~2000  
26 participants) and the baseline high levels of mobility meant the Rivermead Mobility Index  
27 demonstrated a ceiling effect, so could only be used if we altered inclusion criteria. Physical  
28 activity was measured robustly via accelerometry and may be the best candidate. We had  
29 some software and hardware malfunctions but important lessons have been learned to  
30 mitigate these problems in future. Capture of frequency and intensity of activity would  
31 allow comparison with stroke guidelines. Although there is a cost implication, accelerometry  
32 provides a more objective measurement of daily activity and may also be an adequate proxy  
33 of functional mobility, however we will also investigate the benefits of using other PA  
34 measures such as questionnaires (instead of our diaries) or using multiple measures such as  
35 accelerometry and heart rate monitors whilst being aware of problems with compliance and  
36 participant burden<sup>46</sup>.  
37  
38  
39  
40  
41  
42  
43  
44  
45  
46

47 Further limitations relate to the lack of validation of our adherence measure and the local  
48 demographics: our sample did not have a wide age range or ethnic diversity. Whilst we did  
49 demonstrate delivery in different locations in the South West our plans for a larger  
50 definitive trial would include a wider demographic from more centres across the UK.  
51  
52

53 For a future trial we plan to implement more readable, higher quality written (and pictorial)  
54 information and questionnaires although the amount of information provided was  
55 appropriate. We will mitigate recruitment loss prior to randomisation by establishing  
56 expression of interest and eligibility to take part but delaying taking consent until we are  
57  
58  
59  
60

1  
2  
3 confident of sufficient numbers to create a cohort for randomisation; this has resource  
4 implications that will need to be built into future funding. We will run ReTrain in community  
5 centres or halls as these were more acceptable and much cheaper than gyms; we will  
6 provide a more detailed ReTrain induction to ensure trainers understand and communicate  
7 all components of the programme. For the QALY comparisons recent policy changes mean  
8 the conversion from SF-12 to SF-6D has been phased out, and so less justification for using  
9 the SF-12 in a future study. Instead we will consider using the Stroke Impact Scale (SIS) as  
10 this is a valid health-related QoL measure. This may also be a better candidate self-report  
11 primary outcome measure for a definitive trial as it has shown sensitivity in long-term stroke  
12 survivors who have mild to moderate stroke<sup>47</sup>. The SIS assesses multiple facets of physical  
13 and emotional issues and so would align with perceived physical and psychological benefits  
14 participants attribute to ReTrain. Our sample size estimates for candidate objective primary  
15 outcomes (Table 2) indicate we will need a moderately sized trial (n=562, effect size 0.3 or  
16 n=413, effect size 0.35) for PA assessed by accelerometry or a smaller trial (n=96) if we use  
17 the physical component domain of the SIS (based on 80% power, 5% alpha and assuming  
18 20% attrition<sup>48</sup>). We have established appropriate process evaluation methods to capture  
19 multiple facets of intervention fidelity.  
20  
21

### 22 **Generalisability**

23  
24 This pilot study was not designed to demonstrate generalisability however our participant  
25 population represent the sub-set of community-dwelling stroke survivors who have some  
26 independent mobility but remain with stroke-related disability that affects their QoL. Our  
27 participants also represent the growing proportion of people who have more than one long-  
28 term condition. ReTrain techniques target the effects of stroke but can accommodate other  
29 conditions which trainers take into account when preparing the participant's individually  
30 tailored programme. Some of the key ReTrain (ARNI based) techniques are designed for  
31 people with unilateral impairment, such as hemiparesis; however one of our participant's  
32 main unilateral impairment was due to diabetes related lower limb amputation, illustrating  
33 how ReTrain can accommodate people with multiple co-morbidities.  
34  
35

### 36 **Conclusion**

37  
38 Our pilot trial has demonstrated that ReTrain is feasible, acceptable, and safe. We met our  
39 recruitment and retention targets and demonstrated our ability to run our intervention in  
40 different locations. Participants were not unduly burdened by study requirements and most  
41 outcome measures had high levels of completion. We successfully tested procedures for  
42 process and health economic evaluations. Participant interviews, outcome measurement  
43 results and fidelity assessments highlighted some issues needing refinement prior to a  
44 future definitive RCT of ReTrain. Many of these have already been addressed and we intend  
45 to seek funding for a definitive trial.  
46  
47  
48  
49  
50  
51  
52  
53  
54  
55  
56  
57  
58  
59  
60

## Other information

**Protocol** Version: 5 Date: 20/04/2016. Published version available here:

<http://bmjopen.bmj.com/content/6/10/e012375.full>

## Acknowledgements

We thank our funders, the Stroke Association and the Peninsula Patient Involvement Group with the ReTrain Stroke Service User Group for their help. The National Institute for Health Research (NIHR) Collaboration for Leadership in Applied Health Research and Care South West Peninsula at the Royal Devon and Exeter NHS Foundation Trust also supported this work but views expressed are those of the author(s) and not necessarily those of the NHS, the NIHR or the Department of Health. We also thank our Trial Steering Committee: Ailie Turton (University of the West of England) Siobhan Creanor (Plymouth University), Debbie Neal (Bournemouth University), Justin Smallwood (Patient and Public representative), and Gail Seymour (University of Exeter - Sponsor).

Ethical review by NRES Committee South West – Cornwall & Plymouth (REC ref: 15/SW/04).

## Author's Contributions

SGD led the team and drafted this article, RC prepared protocol, ethical submission and amendments, managed the project, contributed to analysis; LP drafted protocol prior to funding application, conducted interviews, contributed to analysis, AF, MJ, RA, MN, SGD & LP provided stroke rehabilitation expertise; RST provided statistical and trial methodological expertise, led analysis; MN provided qualitative expertise and analysed qualitative data; AIS led accelerometry work, supported by RP who provided accelerometry analysis; SGD & LP provided process evaluation expertise, SGD led the process evaluation and supervised LH; LH led video analysis work; AS provided health economic expertise and led economic work supported by PL; SS provided patient and public involvement expertise. All authors commented on the manuscript.

**Data sharing statement:** Participants did not consent for datasets to be stored or accessed outside of the research team. Therefore no datasets have been made publicly available.

**Competing Interests:** We declare funding from the Stroke Association.

## References

1. Feigin VL, Barker-Collo S, McNaughton H, et al. Long-term neuropsychological and functional outcomes in stroke survivors: current evidence and perspectives for new research. *Int J Stroke* 2008;3(1):33-40.
2. Townsend N, Wickramasinghe K, Bhatnagar P, et al. Coronary heart disease statistics: 2012 edition. London: British Heart Foundation, 2012.
3. Teasell R, Mehta S, Pereira S, et al. Time to rethink long-term rehabilitation management of stroke patients. *Top Stroke Rehabil* 2012;19(6):457-62.
4. McKeivitt C, Fudge N, Redfern J, et al. Self-reported long-term needs after stroke. *Stroke* 2011;42(5):1398-403.
5. Intercollegiate Stroke Working Party. National Clinical Guideline for Stroke, Fifth Edition. 5 ed. London: *Royal College of Physicians* 2016.
6. Rand D, Eng JJ, Tang PF, et al. How active are people with stroke?: use of accelerometers to assess physical activity. *Stroke* 2009;40(1):163-8.
7. Stroke Association. Stroke Statistics. London: Stroke Association, 2013.
8. Best C, van Wijck F, Dennis J, et al. A survey of community exercise programmes for stroke survivors in Scotland. *Health Soc Care Community* 2012;20(4):400-11.
9. NHS Stroke Improvement Programme. Life after stroke: Participating in community exercise and fitness 2012 [Available from: <http://www.improvement.nhs.uk/stroke/CommunityStrokeResource/CSRLifeafterstroke/CSRLifeafterstrokeexercisepoststroke/tabid/226/Default.aspx> accessed July 2012.
10. Harrington R, Taylor G, Hollinghurst S, et al. A community-based exercise and education scheme for stroke survivors: a randomized controlled trial and economic evaluation. *Clin Rehabil* 2010;24(1):3-15.
11. French B, Thomas LH, Leathley MJ, et al. Repetitive task training for improving functional ability after stroke. *Cochrane Database Syst Rev* 2007(4):Cd006073.
12. Lennon S, McKenna S, Jones F. Self-management programmes for people post stroke: a systematic review. *Clin Rehabil* 2013;27(10):867-78.
13. Brazzelli M, Saunders David H, Greig Carolyn A, et al. Physical fitness training for stroke patients. *Cochrane Database Syst Rev* 2011; (11). <http://www.mrw.interscience.wiley.com/cochrane/clsystrev/articles/CD003316/frame.html>.
14. Balchin T. The Successful Stroke Survivor: A new guide to functional recovery from stroke. Lingfield, UK: ARNI Trust 2011.
15. Poltawski L. Survey of Group ARNI classes in England, 2011, unpublished report.
16. Craig P, Dieppe P, Macintyre S, et al. Developing and evaluating complex interventions: the new Medical Research Council guidance. *BMJ* 2008;337:a1655.
17. Poltawski L, Abraham C, Forster A, et al. Synthesising practice guidelines for the development of community-based exercise programmes after stroke. *Implement Sci* 2013;8:115.
18. Kilbride C, Norris M, Theis N, et al. Action for Rehabilitation from Neurological Injury (ARNI): A pragmatic study of functional training for stroke survivors. *Open J Ther Rehabil* 2013;1:40-51.
19. Poltawski L, Briggs J, Forster A, et al. Informing the design of a randomised controlled trial of an exercise-based programme for long term stroke survivors: lessons from a before-and-after case series study. *BMC Res Notes* 2013;6:324.

20. Norris M, Kilbride C, Mohagheghi A, et al. A Qualitative Exploration of Participation in an Exercise Instructor Led Functional Training Programme for Community Dwelling Stroke Survivors. *Int J Ther Rehabil* 2013;20(12):597-605.
21. Eldridge SM, Chan CL, Campbell MJ, et al. CONSORT 2010 statement: extension to randomised pilot and feasibility trials. *BMJ* 2016;355.
22. Dean SG, Poltawski L, Forster A, et al. Community-based Rehabilitation Training after stroke: protocol of a pilot randomised controlled trial (ReTrain). *BMJ Open* 2016;6(10).
23. Stroke Association. Exercise and stroke London2013 [Available from: [https://www.stroke.org.uk/sites/default/files/exercise\\_and\\_stroke.pdf](https://www.stroke.org.uk/sites/default/files/exercise_and_stroke.pdf) accessed 24 05 2017 2017].
24. ACSM. American College of Sports Medicine Guidelines for Exercise Testing and Prescription. Philadelphia: American College of Sports Medicine, 2005.
25. Carnes D, Mullinger B, Underwood M. Defining adverse events in manual therapies: A modified Delphi consensus study. *Man Ther* 2010;15(1);2-6.
26. Green J, Forster A, Young J. A test-retest reliability study of the Barthel Index, the Rivermead Mobility Index, the Nottingham Extended Activities of Daily Living Scale and the Frenchay Activities Index in stroke patients. *Disabil Rehabil* 2001;23(15):670-6.
27. Hsieh CL, Hsueh IP, Mao HF. Validity and responsiveness of the rivermead mobility index in stroke patients. *Scand J Rehabil Med* 2000;32(3):140-2.
28. Ng SS, Hui-Chan CW. The timed up & go test: its reliability and association with lower-limb impairments and locomotor capacities in people with chronic stroke. *Arch Phys Med Rehabil* 2005;86(8):1641-7.
29. Stratford P, Gill C, Westaway M, et al. Assessing Disability and Change on Individual Patients: A Report of a Patient Specific Measure. *Physiother Can* 1995;47(4):258-63.
30. Jones F, Partridge C, Reid F. The Stroke Self-Efficacy Questionnaire: measuring individual confidence in functional performance after stroke. *J Clin Nurs* 2008;17(7b):244-52.
31. Michielsen HJ, De Vries J, Van Heck GL. Psychometric qualities of a brief self-rated fatigue measure: The Fatigue Assessment Scale. *J Psychosom Res* 2003;54(4):345-52.
32. Mead G, Lynch J, Greig C, et al. Evaluation of fatigue scales in stroke patients. *Stroke* 2007;38(7):2090-5.
33. Shaughnessy M, Resnick BM, Macko RF. Reliability and validity testing of the short self-efficacy and outcome expectation for exercise scales in stroke survivors. *J Stroke Cerebrovasc Dis* 2004;13(5):214-9.
34. Bohannon RW, Maljanian R, Lee N, et al. Measurement properties of the short form (SF)-12 applied to patients with stroke. *Int J Rehabil Res* 2004;27(2):151-4.
35. Herdman M, Gudex C, Lloyd A, et al. Development and preliminary testing of the new five-level version of EQ-5D (EQ-5D-5L). *Qual Life Res* 2011;20(10):1727-36.
36. Williams LS, Weinberger M, Harris LE, et al. Development of a stroke-specific quality of life scale. *Stroke* 1999;30(7):1362-9.
37. Thornton M, Travis SS. Analysis of the reliability of the modified caregiver strain index. *J Gerontol B, Psychol Sci Soc Sci* 2003;58(2):S127-32.
38. Craig LE, Wu O, Bernhardt J, et al. Approaches to economic evaluations of stroke rehabilitation. *Int J Stroke* 2014;9(1):88-100.
39. Browne RH. On the use of a pilot sample for sample size determination. *Stat Med* 1995;14(17):1933-4.

- 1  
2  
3 40. Bruno A, Akinwuntan AE, Lin C, et al. Simplified Modified Rankin Scale Questionnaire:  
4 Reproducibility Over the Telephone and Validation With Quality of Life. *Stroke* 2011;  
5 42(8)2276-9.  
6  
7 41. Hislop J, Adewuyi TE, Vale LD, et al. Methods for specifying the target difference in a  
8 randomised controlled trial: the Difference ELicitation in TriAls (DELTA) systematic  
9 review. *PLoS Med* 2014;11(5):e1001645.  
10  
11 42. Gautschi OP, Stienen MN, Corniola et al. Assessment of the Minimum Clinically  
12 Important Difference in the Timed Up and Go Test After Surgery for Lumbar Degenerative  
13 Disc Disease. *Neurosurgery* 2017; 80 (3):380-385.  
14  
15 43. Horn KK, Jennings S, Richardson G, et al. The patient-specific functional scale:  
16 psychometrics, clinimetrics, and application as a clinical outcome measure. *J Orthop*  
17 *Sports Phys Ther* 2012; 42 (1):30-42.  
18  
19 44. McKenna S, Jones F, Glenfield P, et al. Bridges self-management program for people with  
20 stroke in the community: A feasibility randomized controlled trial. *Int J Stroke*  
21 2015;10(5):697-704.  
22  
23 45. Wade DT. Outcome measures for clinical rehabilitation trials: impairment, function,  
24 quality of life, or value? *Am J Phys Med Rehabil* 2003;82(10 Suppl):S26-31.  
25  
26 48. Mansfield A, Knorr S, Poon V, et al. Promoting Optimal Physical Exercise for Life: An  
27 Exercise and Self-Management Program to Encourage Participation in Physical Activity  
28 after Discharge from Stroke Rehabilitation – A Feasibility Study. *Stroke Research and*  
29 *Treatment* 2016; [Available from <http://dx.doi.org/10.1155/2016/9476541>].  
30  
31 47. Rehabilitation Institute of Chicago. Rehabilitation Measures Database - Stroke Impact  
32 Scale [Available from:  
33 <http://www.rehabmeasures.org/Lists/RehabMeasures/DispForm.aspx?ID=934> accessed  
34 21 06 2017].  
35  
36 48. Saywell N, Vandal AC, Brown P, et al. Telerehabilitation to improve outcomes for people  
37 with stroke: study protocol for a randomised controlled trial. *Trials* 2012;13(1):233.  
38  
39  
40  
41  
42  
43  
44  
45  
46  
47  
48  
49  
50  
51  
52  
53  
54  
55  
56  
57  
58  
59  
60

Figure 1 – Recruitment and randomisation by cohort

For peer review only

1  
2  
3  
4  
5  
6  
7  
8  
9  
10  
11  
12  
13  
14  
15  
16  
17  
18  
19  
20  
21  
22  
23  
24  
25  
26  
27  
28  
29  
30  
31  
32  
33  
34  
35  
36  
37  
38  
39  
40  
41  
42  
43  
44  
45  
46  
47  
48  
49  
50  
51  
52  
53  
54  
55  
56  
57  
58  
59  
60

1  
2  
3  
4  
5  
6  
7  
8  
9  
10  
11  
12  
13  
14  
15  
16  
17  
18  
19  
20  
21  
22  
23  
24  
25  
26  
27  
28  
29  
30  
31  
32  
33  
34  
35  
36  
37  
38  
39  
40  
41  
42  
43  
44  
45  
46  
47  
48  
49  
50  
51  
52  
53  
54  
55  
56  
57  
58  
59  
60

Figure 2 – Participant flow through the trial

For peer review only



1  
2  
3  
4  
5  
6  
7  
8  
9  
10  
11  
12  
13  
14  
15  
16  
17  
18  
19  
20  
21  
22  
23  
24  
25  
26  
27  
28  
29  
30  
31  
32  
33  
34  
35  
36  
37  
38  
39  
40  
41  
42  
43  
44  
45  
46  
47  
48  
49  
50  
51  
52  
53  
54  
55  
56  
57  
58  
59  
60

Figure 1 – Recruitment and randomisation by cohort

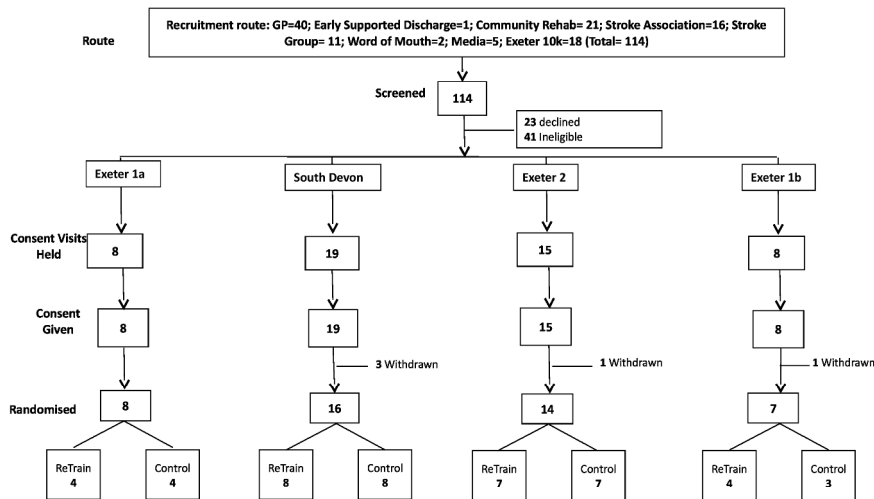

Figure 1 – Recruitment and randomisation by cohort

297x209mm (300 x 300 DPI)

ew only

1  
2  
3  
4  
5  
6  
7  
8  
9  
10  
11  
12  
13  
14  
15  
16  
17  
18  
19  
20  
21  
22  
23  
24  
25  
26  
27  
28  
29  
30  
31  
32  
33  
34  
35  
36  
37  
38  
39  
40  
41  
42  
43  
44  
45  
46  
47  
48  
49  
50  
51  
52  
53  
54  
55  
56  
57  
58  
59  
60

Figure 2 – Participant flow through the trial



Figure 2 – Participant flow through the trial

209x297mm (300 x 300 DPI)

## RESEARCH METHODS AND REPORTING

Table 2 | CONSORT checklist of information to include when reporting a pilot trial

| Section/topic and Item No         | Standard checklist item                                                                                                                                                                     | Extension for pilot trials                                                                                                                                   | Page No where item is reported |
|-----------------------------------|---------------------------------------------------------------------------------------------------------------------------------------------------------------------------------------------|--------------------------------------------------------------------------------------------------------------------------------------------------------------|--------------------------------|
| <b>Title and abstract</b>         |                                                                                                                                                                                             |                                                                                                                                                              |                                |
| 1a                                | Identification as a randomised trial in the title                                                                                                                                           | Identification as a pilot or feasibility randomised trial in the title                                                                                       | 1                              |
| 1b                                | Structured summary of trial design, methods, results, and conclusions (for specific guidance see CONSORT for abstracts)                                                                     | Structured summary of pilot trial design, methods, results, and conclusions (for specific guidance see CONSORT abstract extension for pilot trials)          | 2                              |
| <b>Introduction</b>               |                                                                                                                                                                                             |                                                                                                                                                              |                                |
| Background and objectives:        |                                                                                                                                                                                             |                                                                                                                                                              |                                |
| 2a                                | Scientific background and explanation of rationale                                                                                                                                          | Scientific background and explanation of rationale for future definitive trial, and reasons for randomised pilot trial                                       | 4                              |
| 2b                                | Specific objectives or hypotheses                                                                                                                                                           | Specific objectives or research questions for pilot trial                                                                                                    | 4-5                            |
| <b>Methods</b>                    |                                                                                                                                                                                             |                                                                                                                                                              |                                |
| Trial design:                     |                                                                                                                                                                                             |                                                                                                                                                              |                                |
| 3a                                | Description of trial design (such as parallel, factorial) including allocation ratio                                                                                                        | Description of pilot trial design (such as parallel, factorial) including allocation ratio                                                                   | 5                              |
| 3b                                | Important changes to methods after trial commencement (such as eligibility criteria), with reasons                                                                                          | Important changes to methods after pilot trial commencement (such as eligibility criteria), with reasons                                                     | N/A                            |
| Participants:                     |                                                                                                                                                                                             |                                                                                                                                                              |                                |
| 4a                                | Eligibility criteria for participants                                                                                                                                                       |                                                                                                                                                              | 5                              |
| 4b                                | Settings and locations where the data were collected                                                                                                                                        |                                                                                                                                                              | 5-6                            |
| 4c                                |                                                                                                                                                                                             | How participants were identified and consented                                                                                                               | 5                              |
| Interventions:                    |                                                                                                                                                                                             |                                                                                                                                                              |                                |
| 5                                 | The interventions for each group with sufficient details to allow replication, including how and when they were actually administered                                                       |                                                                                                                                                              | 5-6                            |
| Outcomes:                         |                                                                                                                                                                                             |                                                                                                                                                              |                                |
| 6a                                | Completely defined prespecified primary and secondary outcome measures, including how and when they were assessed                                                                           | Completely defined prespecified assessments or measurements to address each pilot trial objective specified in 2b, including how and when they were assessed | 6                              |
| 6b                                | Any changes to trial outcomes after the trial commenced, with reasons                                                                                                                       | Any changes to pilot trial assessments or measurements after the pilot trial commenced, with reasons                                                         | N/A                            |
| 6c                                |                                                                                                                                                                                             | If applicable, prespecified criteria used to judge whether, or how, to proceed with future definitive trial                                                  | N/A                            |
| Sample size:                      |                                                                                                                                                                                             |                                                                                                                                                              |                                |
| 7a                                | How sample size was determined                                                                                                                                                              | Rationale for numbers in the pilot trial                                                                                                                     | 6-7                            |
| 7b                                | When applicable, explanation of any interim analyses and stopping guidelines                                                                                                                |                                                                                                                                                              | N/A                            |
| Randomisation:                    |                                                                                                                                                                                             |                                                                                                                                                              |                                |
| Sequence generation:              |                                                                                                                                                                                             |                                                                                                                                                              |                                |
| 8a                                | Method used to generate the random allocation sequence                                                                                                                                      |                                                                                                                                                              | 7                              |
| 8b                                | Type of randomisation; details of any restriction (such as blocking and block size)                                                                                                         | Type of randomisation(s); details of any restriction (such as blocking and block size)                                                                       | 7                              |
| Allocation concealment mechanism: |                                                                                                                                                                                             |                                                                                                                                                              |                                |
| 9                                 | Mechanism used to implement the random allocation sequence (such as sequentially numbered containers), describing any steps taken to conceal the sequence until interventions were assigned |                                                                                                                                                              | 7                              |
| Implementation:                   |                                                                                                                                                                                             |                                                                                                                                                              |                                |
| 10                                | Who generated the random allocation sequence, enrolled participants, and assigned participants to interventions                                                                             |                                                                                                                                                              | 7                              |
| Blinding:                         |                                                                                                                                                                                             |                                                                                                                                                              |                                |
| 11a                               | If done, who was blinded after assignment to interventions (eg, participants, care providers, those assessing outcomes) and how                                                             |                                                                                                                                                              | 7                              |
| 11b                               | If relevant, description of the similarity of interventions                                                                                                                                 |                                                                                                                                                              | N/A                            |
| Analytical methods:               |                                                                                                                                                                                             |                                                                                                                                                              |                                |
| 12a                               | Statistical methods used to compare groups for primary and secondary outcomes                                                                                                               | Methods used to address each pilot trial objective whether qualitative or quantitative                                                                       | 7                              |
| 12b                               | Methods for additional analyses, such as subgroup analyses and adjusted analyses                                                                                                            | Not applicable                                                                                                                                               | N/A                            |

## RESEARCH METHODS AND REPORTING

Table 2 | CONSORT checklist of information to include when reporting a pilot trial

| Section/topic and Item No                             | Standard checklist item                                                                                                                           | Extension for pilot trials                                                                                                                                                            | Page No where item is reported |
|-------------------------------------------------------|---------------------------------------------------------------------------------------------------------------------------------------------------|---------------------------------------------------------------------------------------------------------------------------------------------------------------------------------------|--------------------------------|
| <b>Results</b>                                        |                                                                                                                                                   |                                                                                                                                                                                       |                                |
| Participant flow (a diagram is strongly recommended): |                                                                                                                                                   |                                                                                                                                                                                       |                                |
| 13a                                                   | For each group, the numbers of participants who were randomly assigned, received intended treatment, and were analysed for the primary outcome    | For each group, the numbers of participants who were approached and/or assessed for eligibility, randomly assigned, received intended treatment, and were assessed for each objective | Figure 1a & 1b<br>p. 8         |
| 13b                                                   | For each group, losses and exclusions after randomisation, together with reasons                                                                  |                                                                                                                                                                                       | Figure 1a & 1b<br>p. 10        |
| <b>Recruitment:</b>                                   |                                                                                                                                                   |                                                                                                                                                                                       |                                |
| 14a                                                   | Dates defining the periods of recruitment and follow-up                                                                                           |                                                                                                                                                                                       | 8                              |
| 14b                                                   | Why the trial ended or was stopped                                                                                                                | Why the pilot trial ended or was stopped                                                                                                                                              | N/A                            |
| <b>Baseline data:</b>                                 |                                                                                                                                                   |                                                                                                                                                                                       |                                |
| 15                                                    | A table showing baseline demographic and clinical characteristics for each group                                                                  |                                                                                                                                                                                       | 8-10                           |
| <b>Numbers analysed:</b>                              |                                                                                                                                                   |                                                                                                                                                                                       |                                |
| 16                                                    | For each group, number of participants (denominator) included in each analysis and whether the analysis was by original assigned groups           | For each objective, number of participants (denominator) included in each analysis. If relevant, these numbers should be by randomised group                                          | Figure 1b                      |
| <b>Outcomes and estimation:</b>                       |                                                                                                                                                   |                                                                                                                                                                                       |                                |
| 17a                                                   | For each primary and secondary outcome, results for each group, and the estimated effect size and its precision (such as 95% confidence interval) | For each objective, results including expressions of uncertainty (such as 95% confidence interval) for any estimates. If relevant, these results should be by randomised group        | N/A                            |
| 17b                                                   | For binary outcomes, presentation of both absolute and relative effect sizes is recommended                                                       | Not applicable                                                                                                                                                                        | N/A                            |
| <b>Ancillary analyses:</b>                            |                                                                                                                                                   |                                                                                                                                                                                       |                                |
| 18                                                    | Results of any other analyses performed, including subgroup analyses and adjusted analyses, distinguishing prespecified from exploratory          | Results of any other analyses performed that could be used to inform the future definitive trial                                                                                      | 10-15                          |
| <b>Harms:</b>                                         |                                                                                                                                                   |                                                                                                                                                                                       |                                |
| 19                                                    | All important harms or unintended effects in each group (for specific guidance see CONSORT for harms)                                             |                                                                                                                                                                                       | 16                             |
| 19a                                                   |                                                                                                                                                   | If relevant, other important unintended consequences                                                                                                                                  | N/A                            |
| <b>Discussion</b>                                     |                                                                                                                                                   |                                                                                                                                                                                       |                                |
| <b>Limitations:</b>                                   |                                                                                                                                                   |                                                                                                                                                                                       |                                |
| 20                                                    | Trial limitations, addressing sources of potential bias, imprecision, and, if relevant, multiplicity of analyses                                  | Pilot trial limitations, addressing sources of potential bias and remaining uncertainty about feasibility                                                                             | 17-18                          |
| <b>Generalisability:</b>                              |                                                                                                                                                   |                                                                                                                                                                                       |                                |
| 21                                                    | Generalisability (external validity, applicability) of the trial findings                                                                         | Generalisability (applicability) of pilot trial methods and findings to future definitive trial and other studies                                                                     | 18                             |
| <b>Interpretation:</b>                                |                                                                                                                                                   |                                                                                                                                                                                       |                                |
| 22                                                    | Interpretation consistent with results, balancing benefits and harms, and considering other relevant evidence                                     | Interpretation consistent with pilot trial objectives and findings, balancing potential benefits and harms, and considering other relevant evidence                                   | 18-19                          |
| 22a                                                   |                                                                                                                                                   | Implications for progression from pilot to future definitive trial, including any proposed amendments                                                                                 | 19                             |
| <b>Other information</b>                              |                                                                                                                                                   |                                                                                                                                                                                       |                                |
| <b>Registration:</b>                                  |                                                                                                                                                   |                                                                                                                                                                                       |                                |
| 23                                                    | Registration number and name of trial registry                                                                                                    | Registration number for pilot trial and name of trial registry                                                                                                                        | 2, 19                          |
| <b>Protocol:</b>                                      |                                                                                                                                                   |                                                                                                                                                                                       |                                |
| 24                                                    | Where the full trial protocol can be accessed, if available                                                                                       | Where the pilot trial protocol can be accessed, if available                                                                                                                          | 19                             |
| <b>Funding:</b>                                       |                                                                                                                                                   |                                                                                                                                                                                       |                                |
| 25                                                    | Sources of funding and other support (such as supply of drugs), role of funders                                                                   |                                                                                                                                                                                       | 2, 19                          |
| 26                                                    |                                                                                                                                                   | Ethical approval or approval by research review committee, confirmed with reference number                                                                                            | 19                             |
